# Supplementary material
Source: PubMed Central journal article supplement (PMC3965257)
Supplement: NIHMS552310-supplement-supplemental_figures_552310.pdf [file NIHMS552310-supplement-supplemental_figures_552310.pdf]

**e2**

**All Slices Acquired for All Participants**

**(N=143, 83 HR, 60 LR)**

**Risk, Resilience, and Illness Effects**

**Covarying for Age, Sex, and Interference Scores**

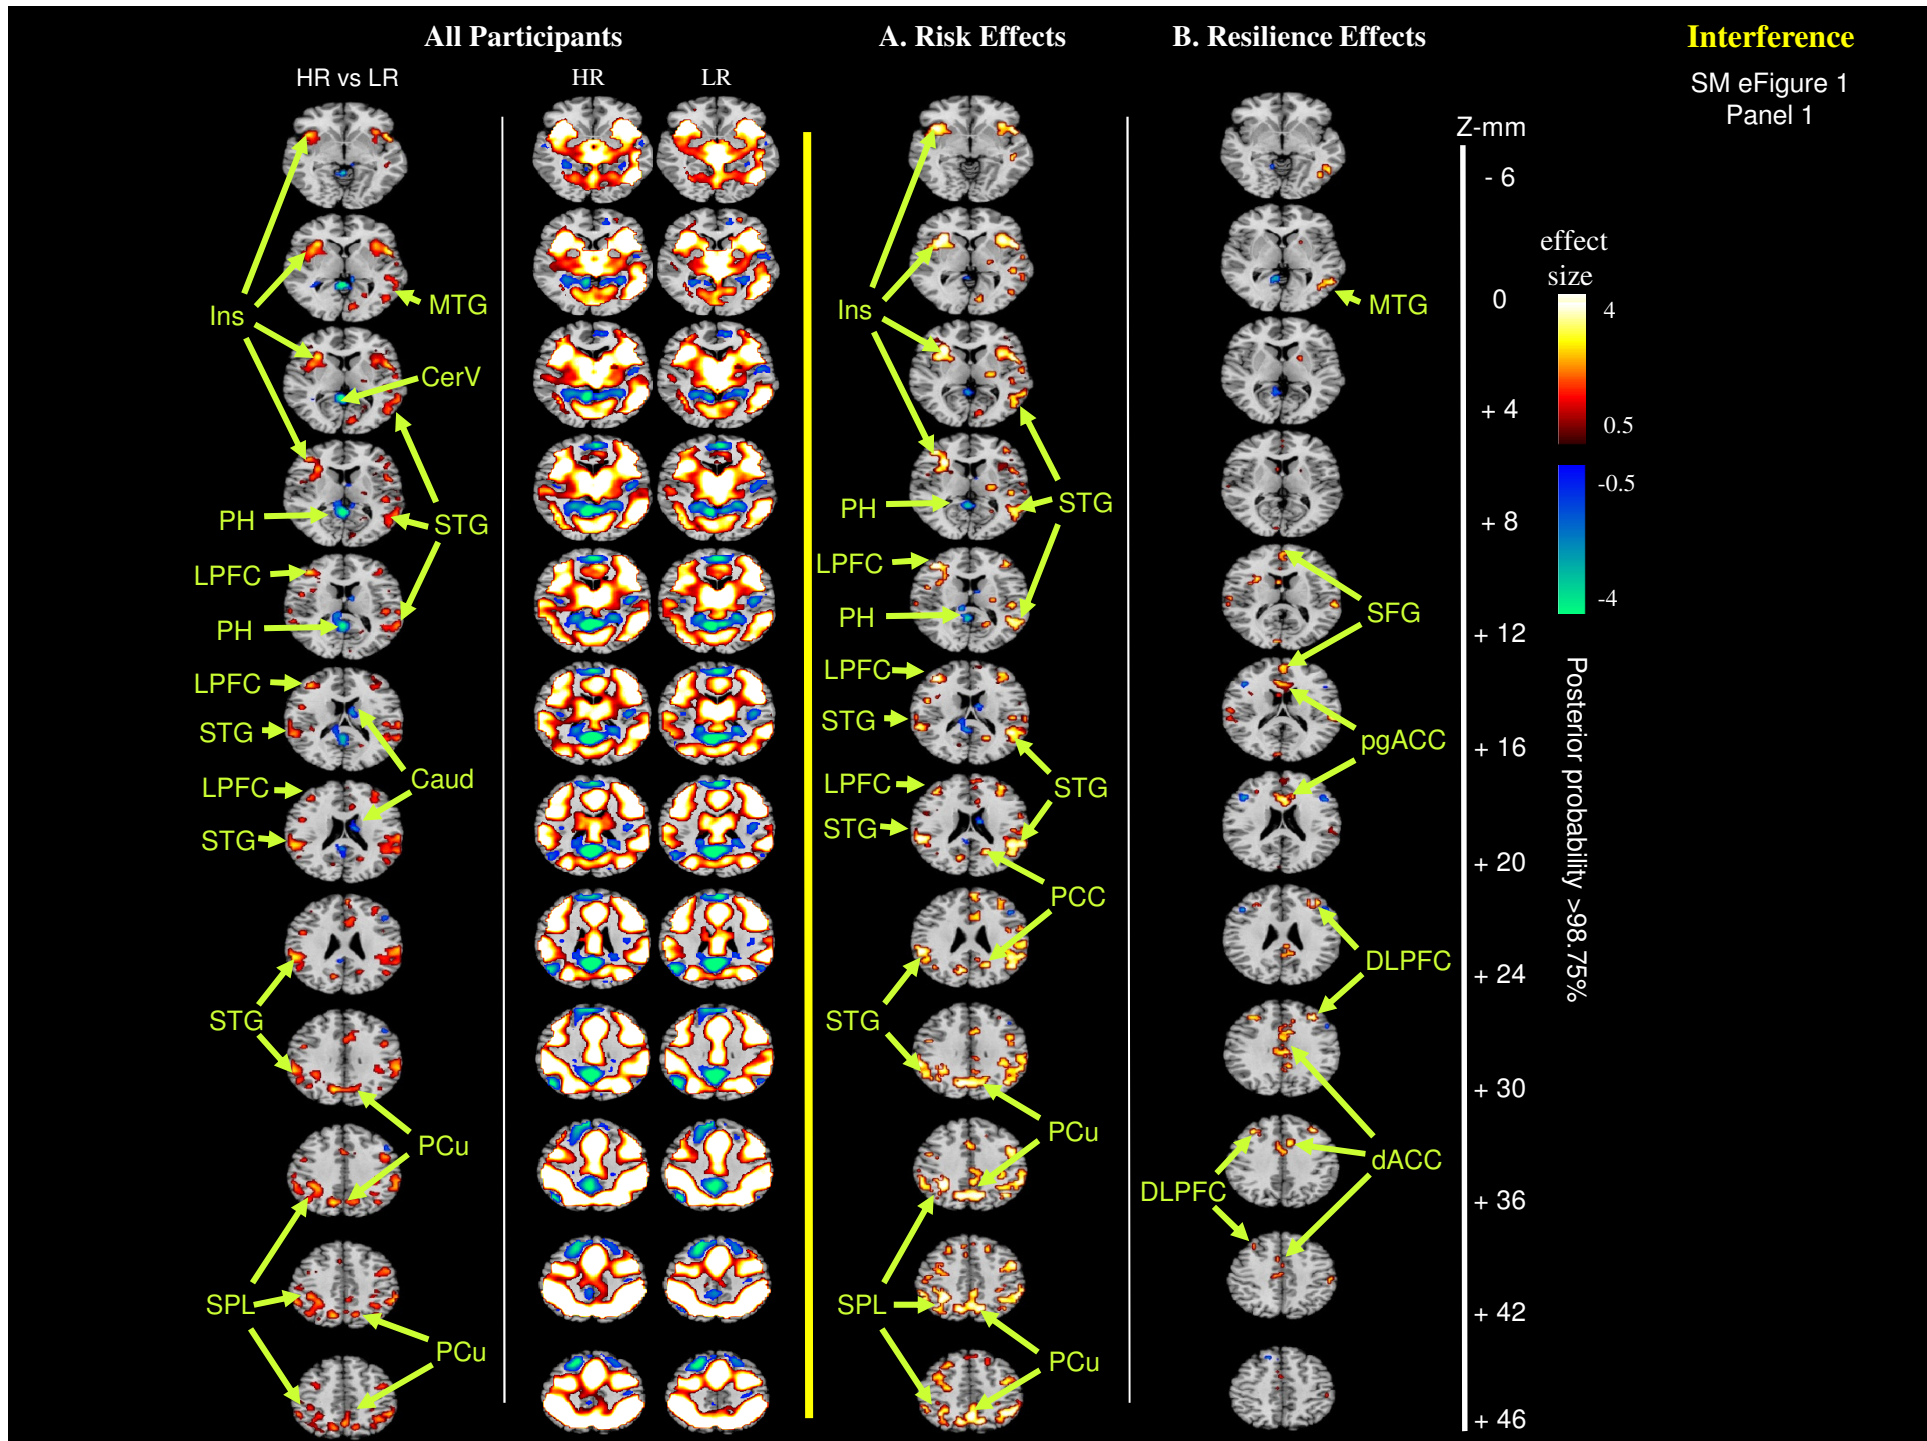

### C. Lifetime Illness Effects

Interference

eFigure 1  
Panel 2

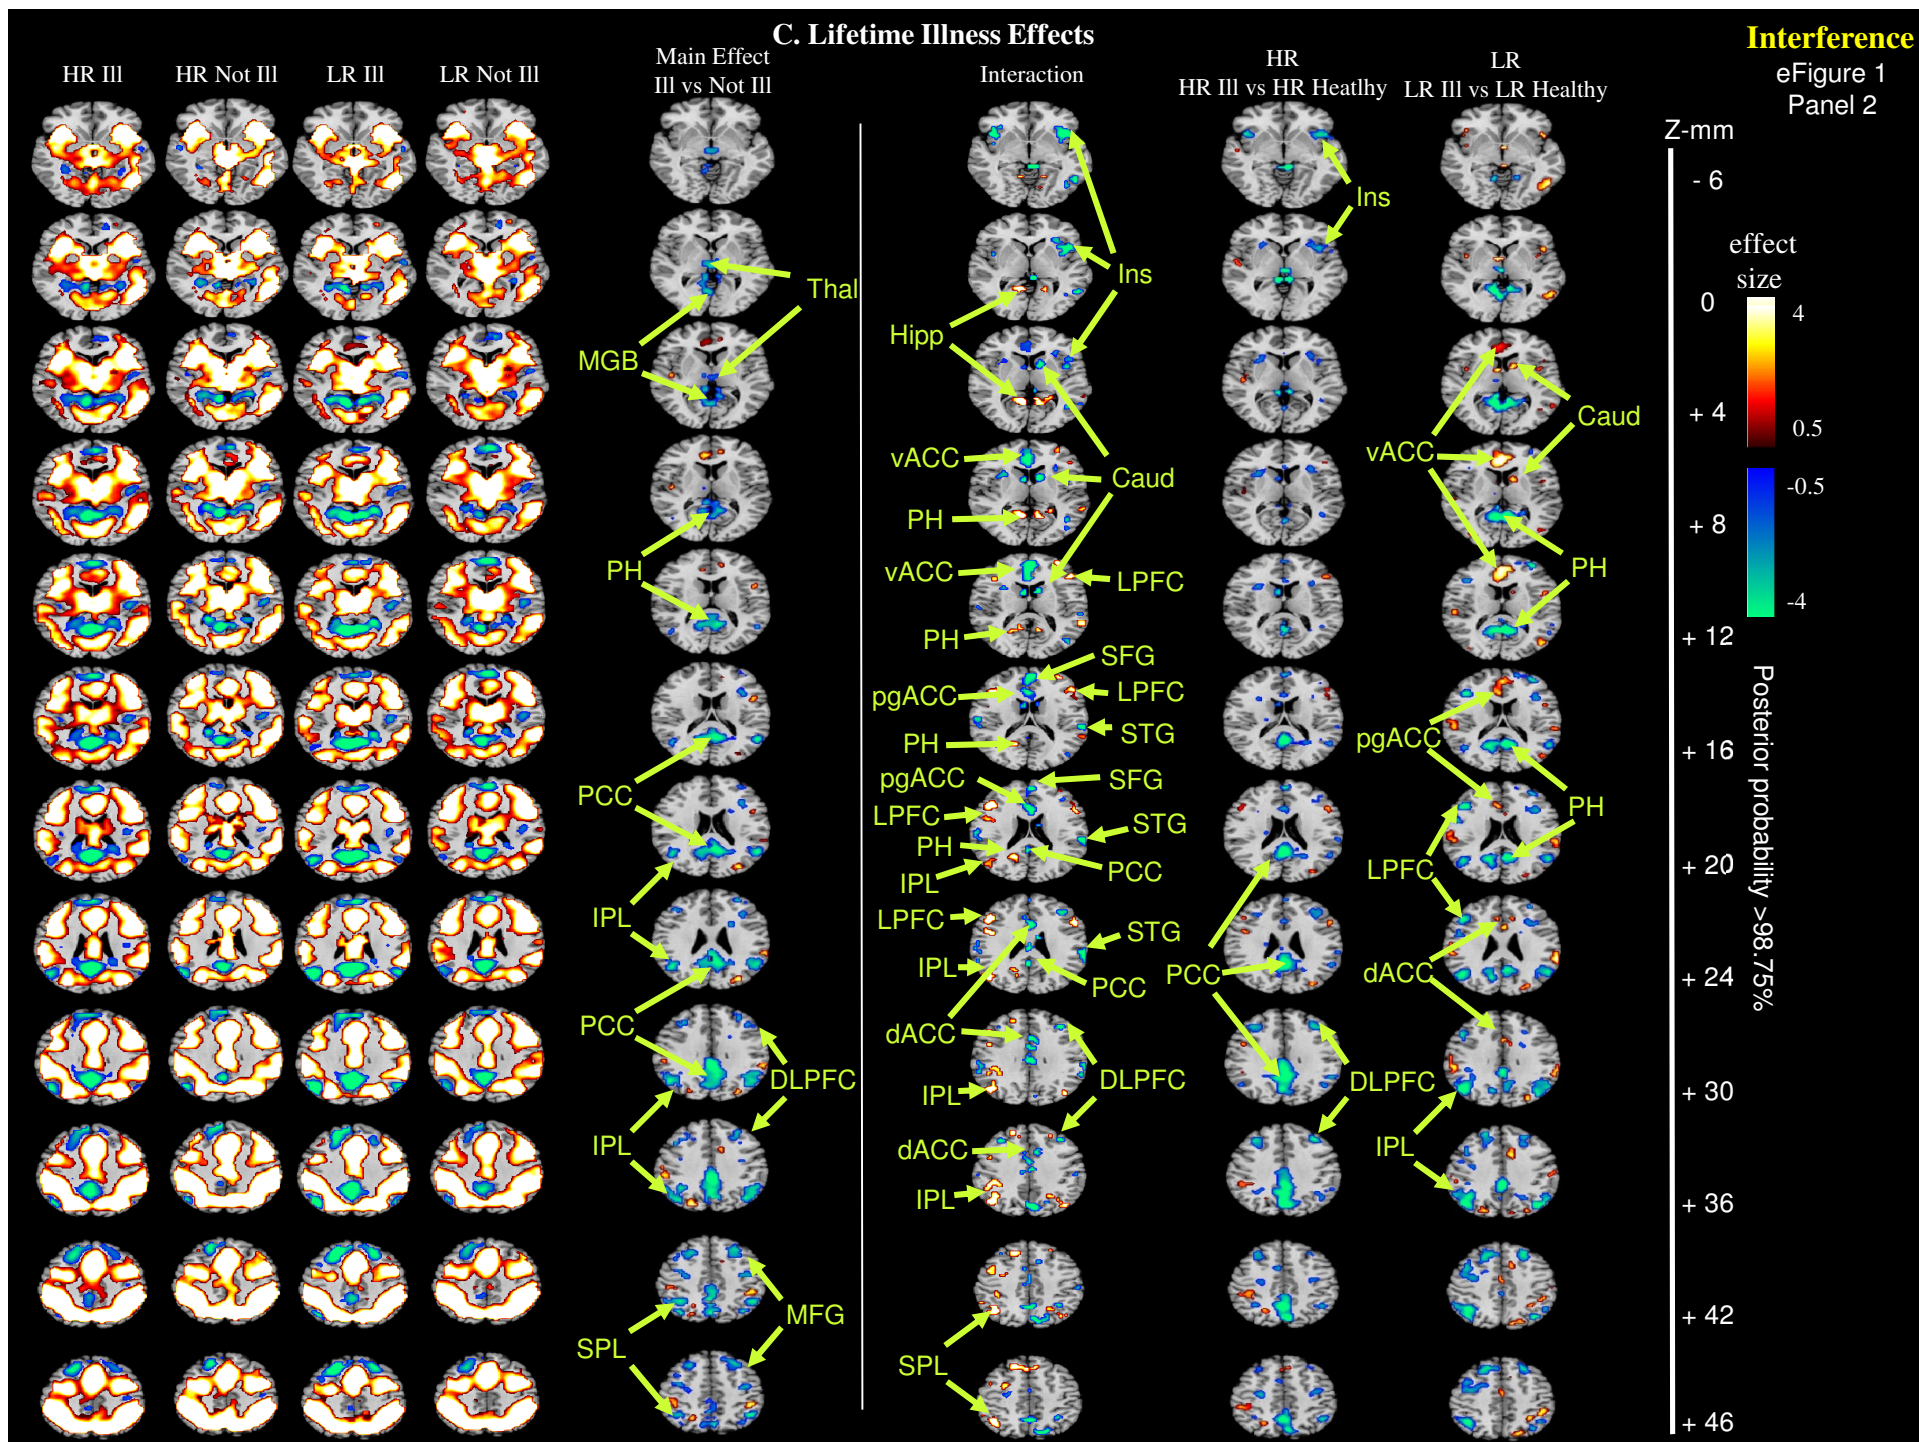



### Resilience Effects

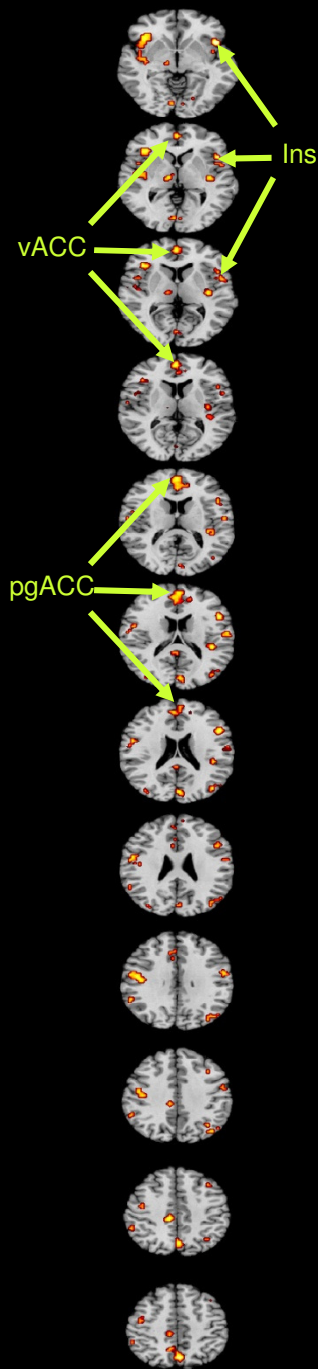

HR Not III

LR Not III

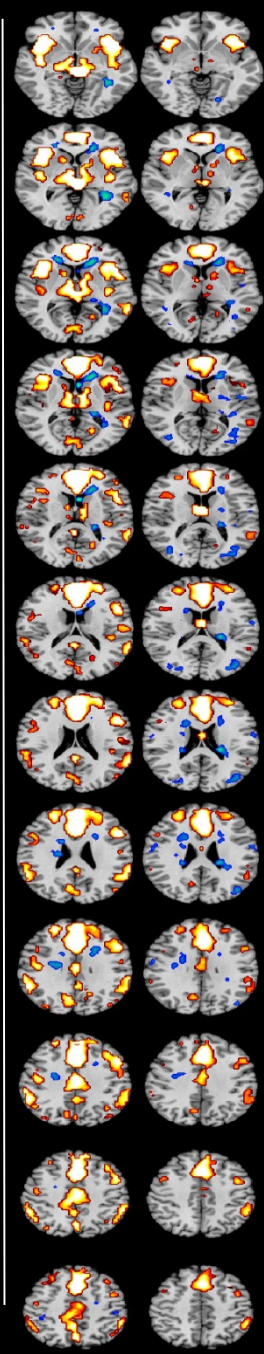

### HR-Specific Illness Effects

HR III vs Not III

HR III

HR Not III

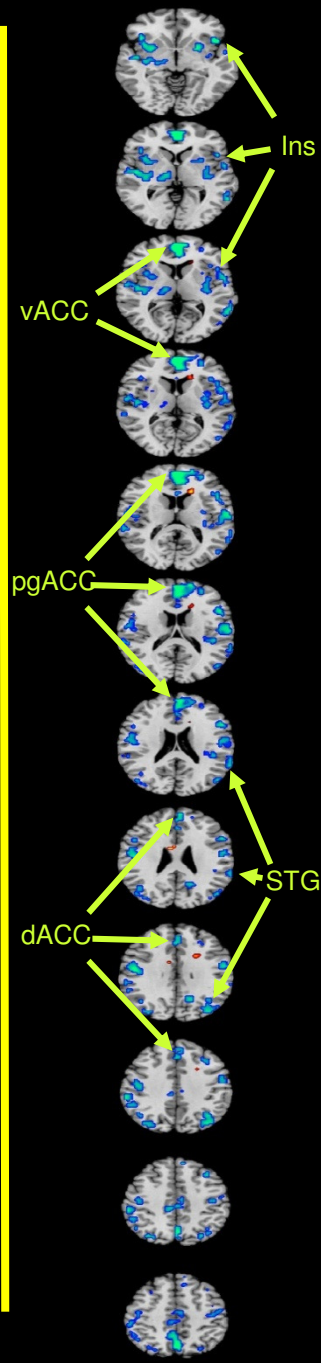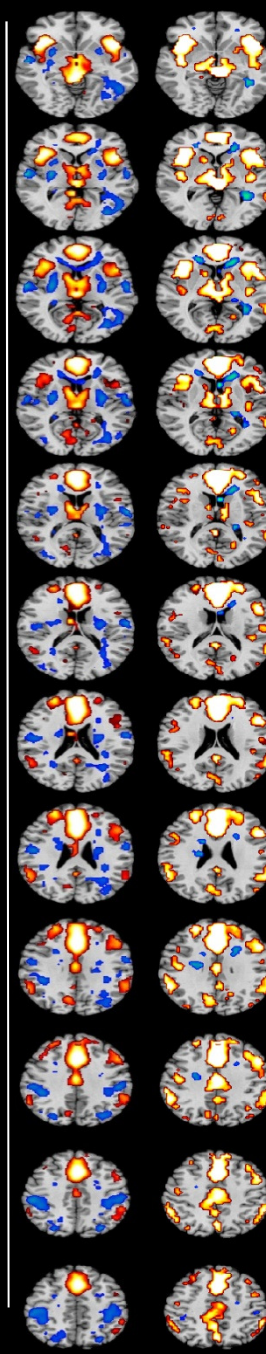

### Error-Related Activity

SM eFigure 2

Z-mm

- 6

0

+ 4

+ 8

+ 12

+ 16

+ 20

+ 24

+ 30

+ 36

+ 42

+ 46

effect size

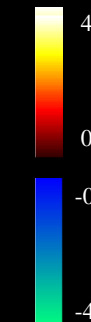

Posterior probability > 98.75%



**e3**

**ASSESSING EFFECTS FOR MDD AND ANXIETY DISORDER SEPARATELY**

**(1) MDD: Covarying for 62 Participants (44 HR, 18 LR)**

**Who Had a Lifetime History of Anxiety Disorder**

**(2) Anxiety: Covarying for 59 Participants (47 HR, 12 LR)**

**Who Had a Lifetime History of MDD**

**Risk, Resilience, and Illness Effects**

**Identified Using Regression Analyses**

**(covarying for age, sex, and interference effects)**

# RISK EFFECTS

## Interference-Related Activity

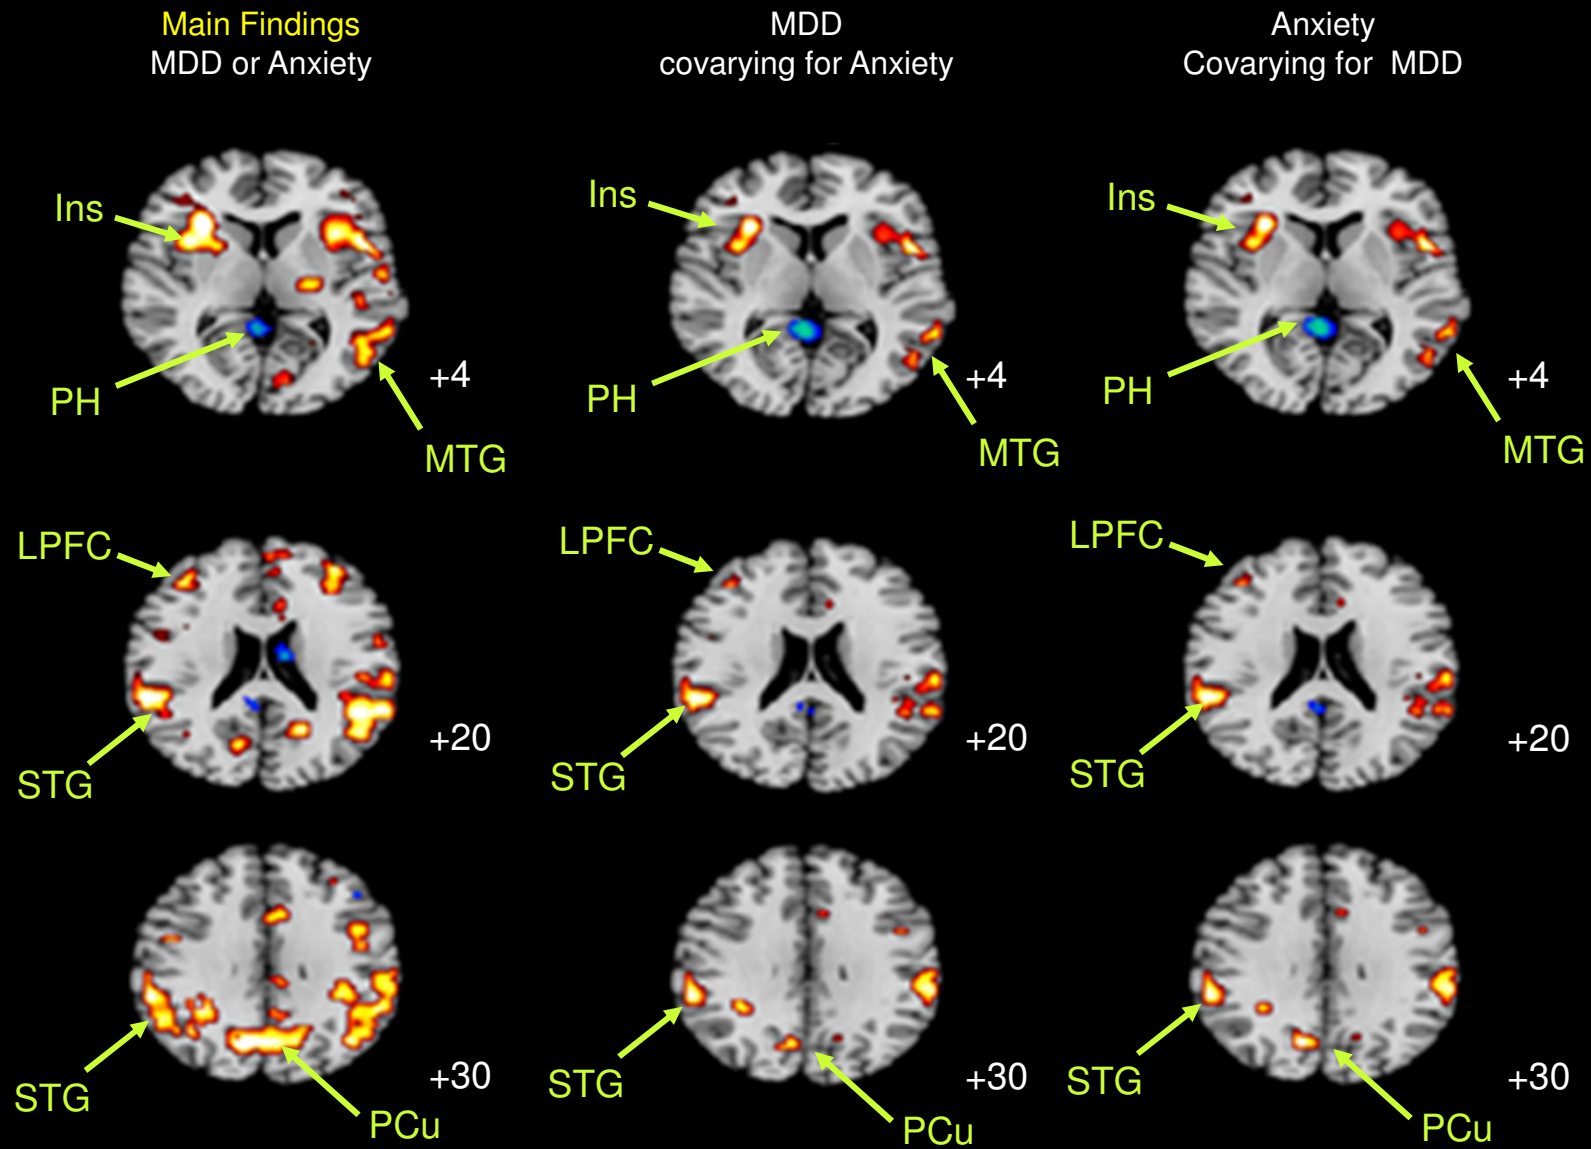

# RESILIENCE EFFECTS

## Interference-Related Activity

Main Findings  
MDD or Anxiety

MDD  
covarying for Anxiety

Anxiety  
Covarying for MDD

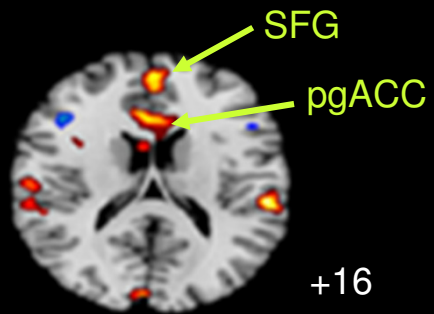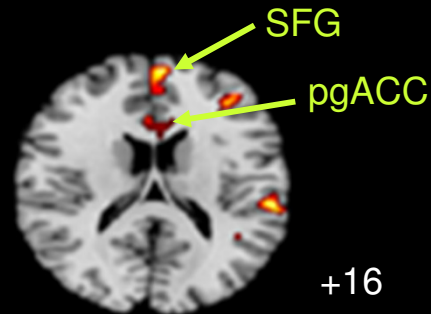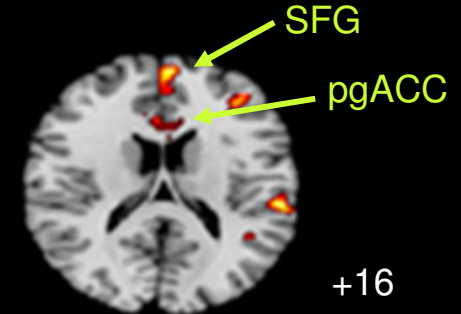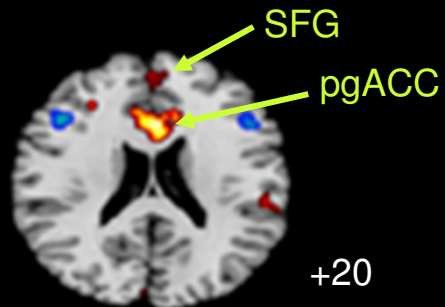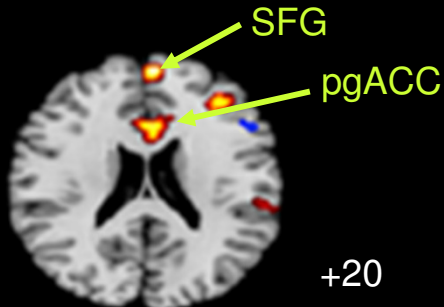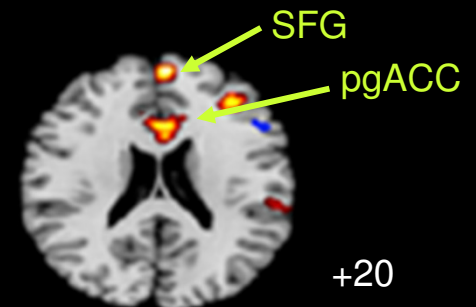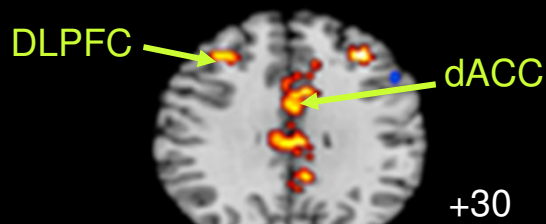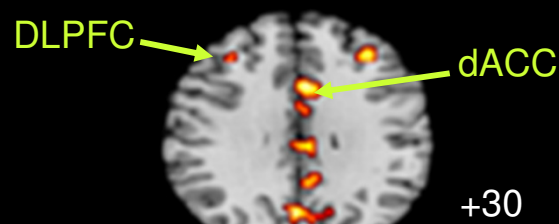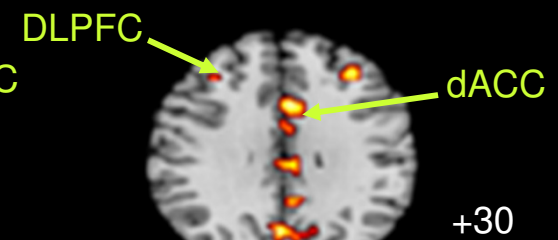



# LIFETIME ILLNESS EFFECTS

## Interference-Related Activity

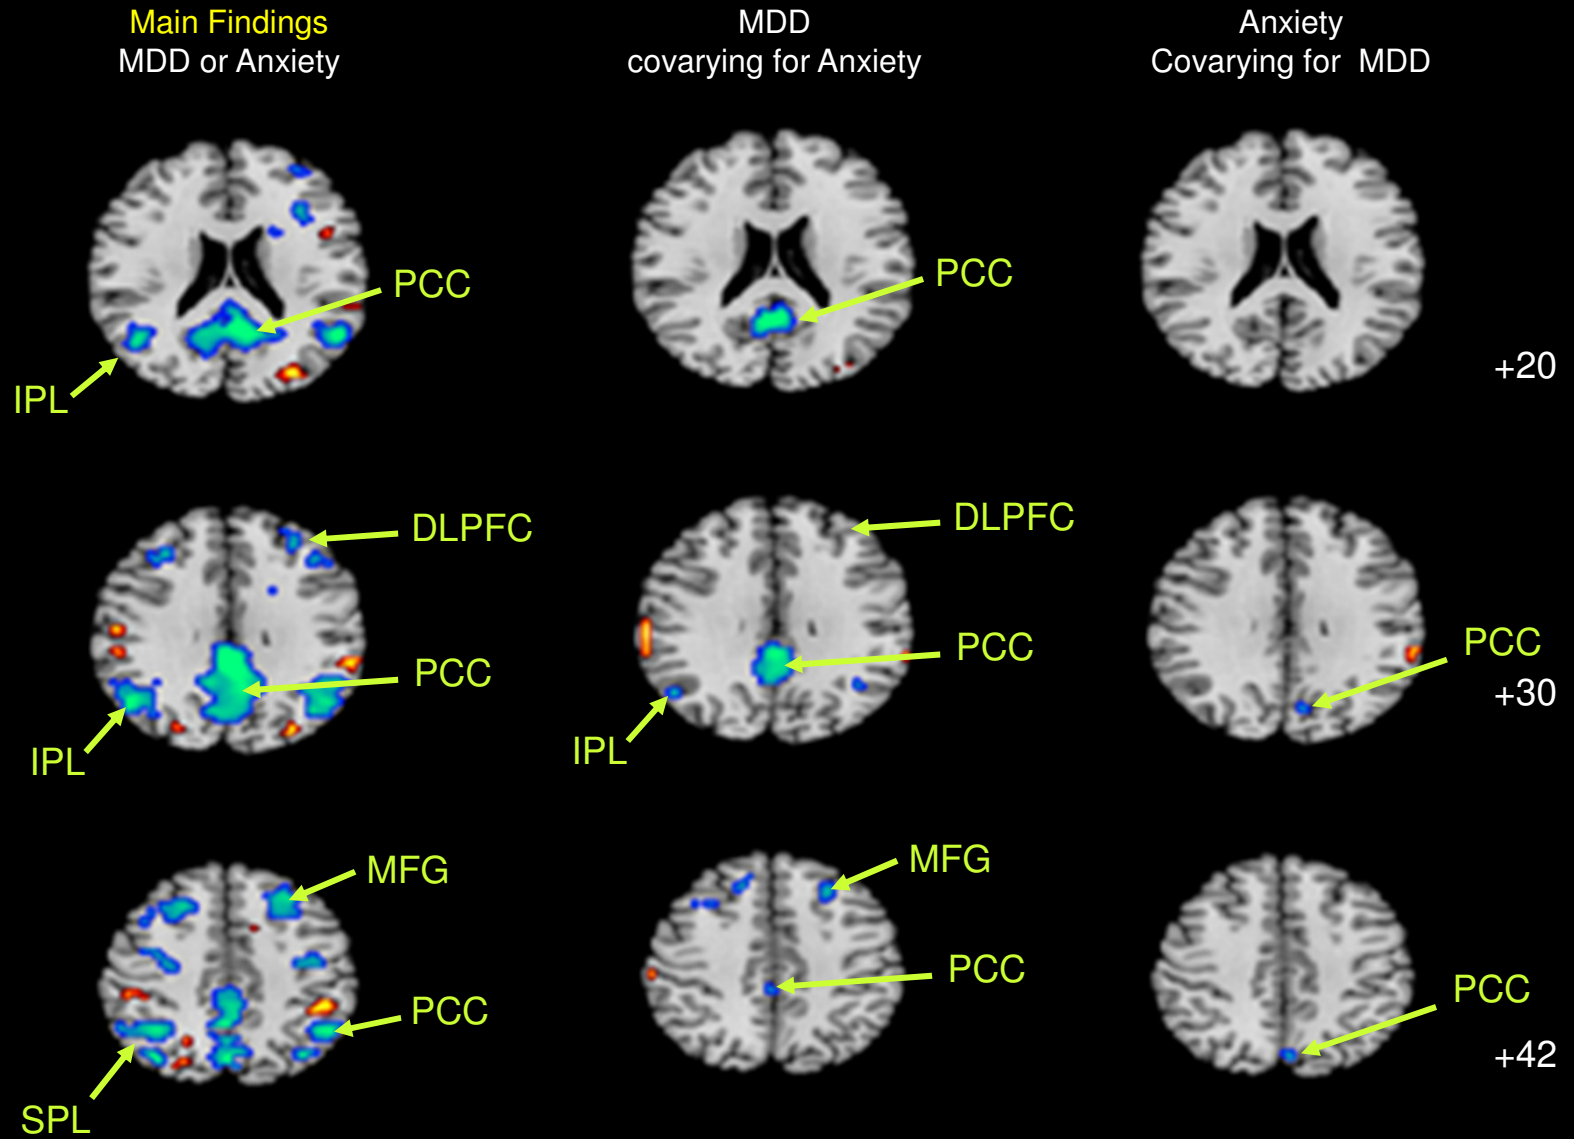

**e4**

## **Findings while Covarying for Generation 2 or 3**

Identification of Risk, Resilience, and Illness Effects

Covarying for Age, Sex, Interference Scores, and Generation (G2 or G3),  
all participants included (N=143, 83 HR, 60 LR)

Columns labeled “w G” are maps generated while covarying for Generation

Columns without “w G” are the findings without covarying for Generation

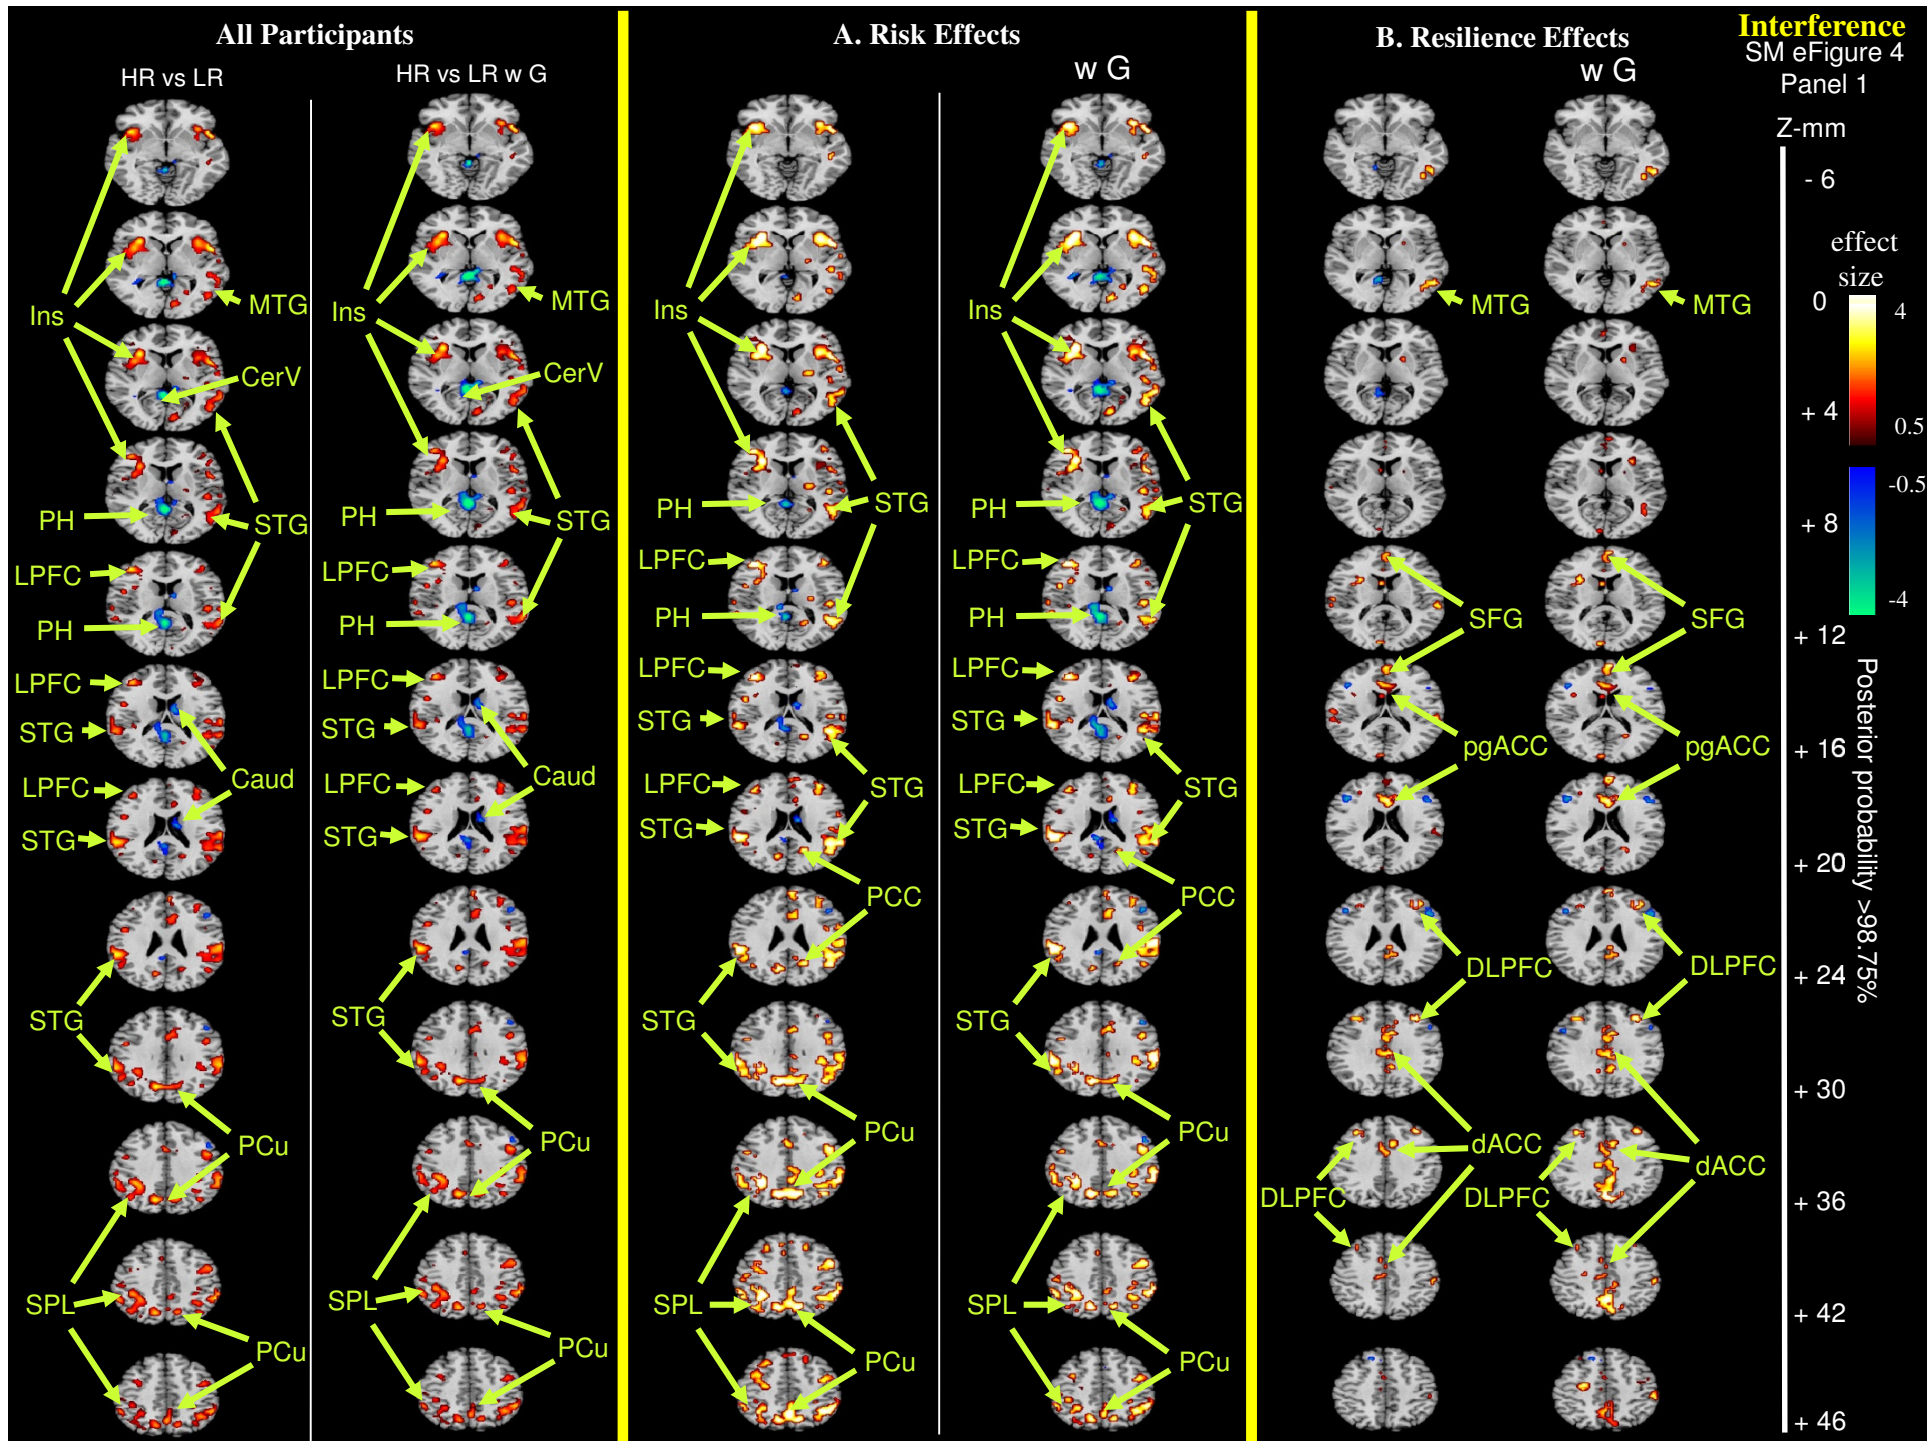



Main Effect III vs Not III

### C. Lifetime Illness Effects

Interaction

Interference

SM eFigure 4  
Panel 2

Z-mm

-6  
+4  
+8  
+12  
+16  
+20  
+24  
+30  
+36  
+42  
+46

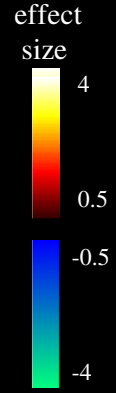

Posterior probability >98.75%

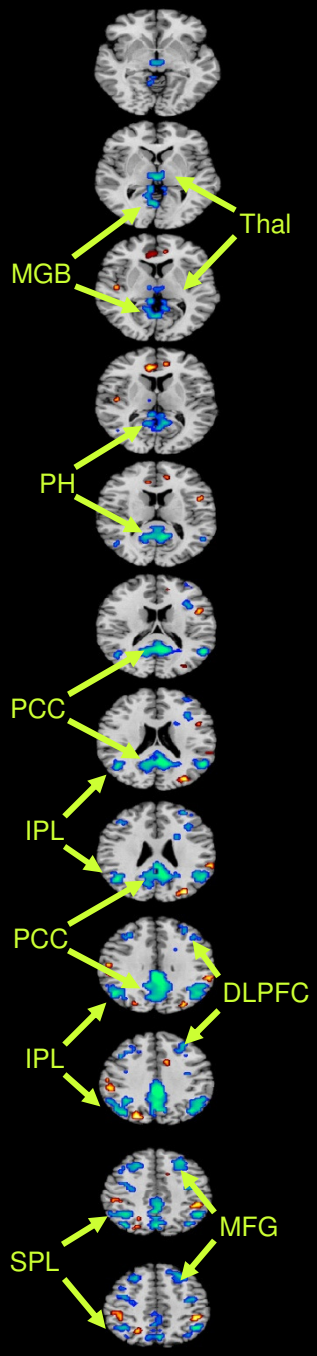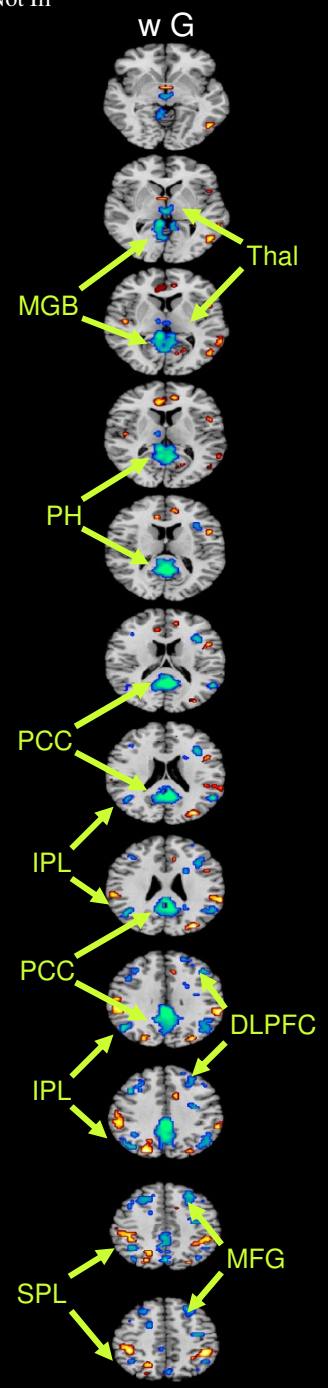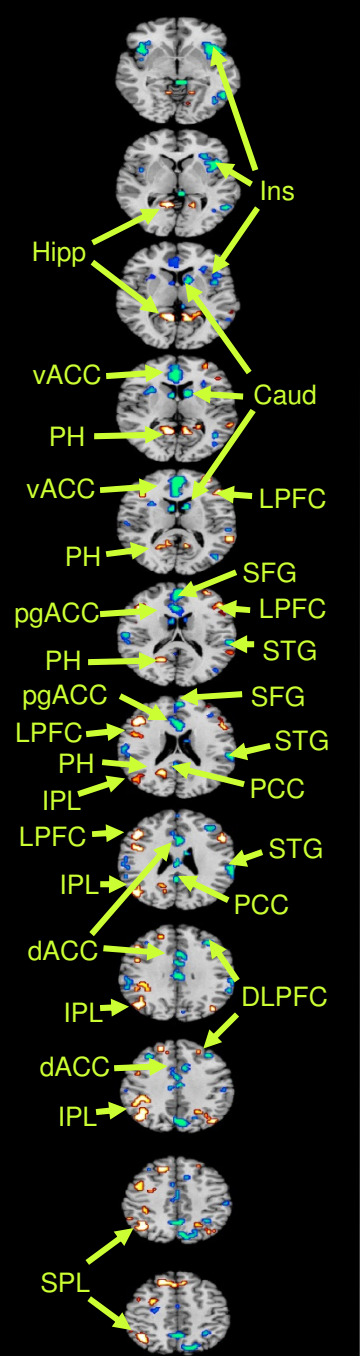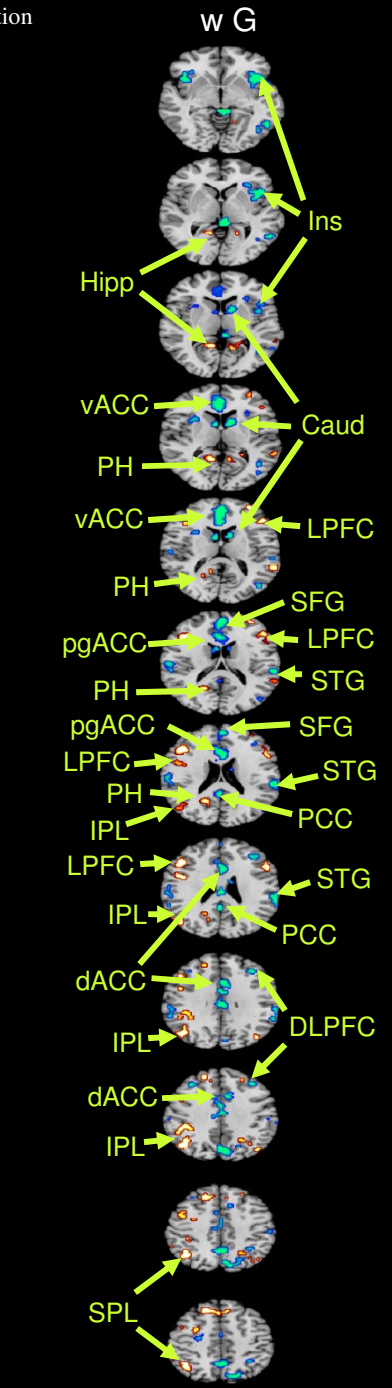

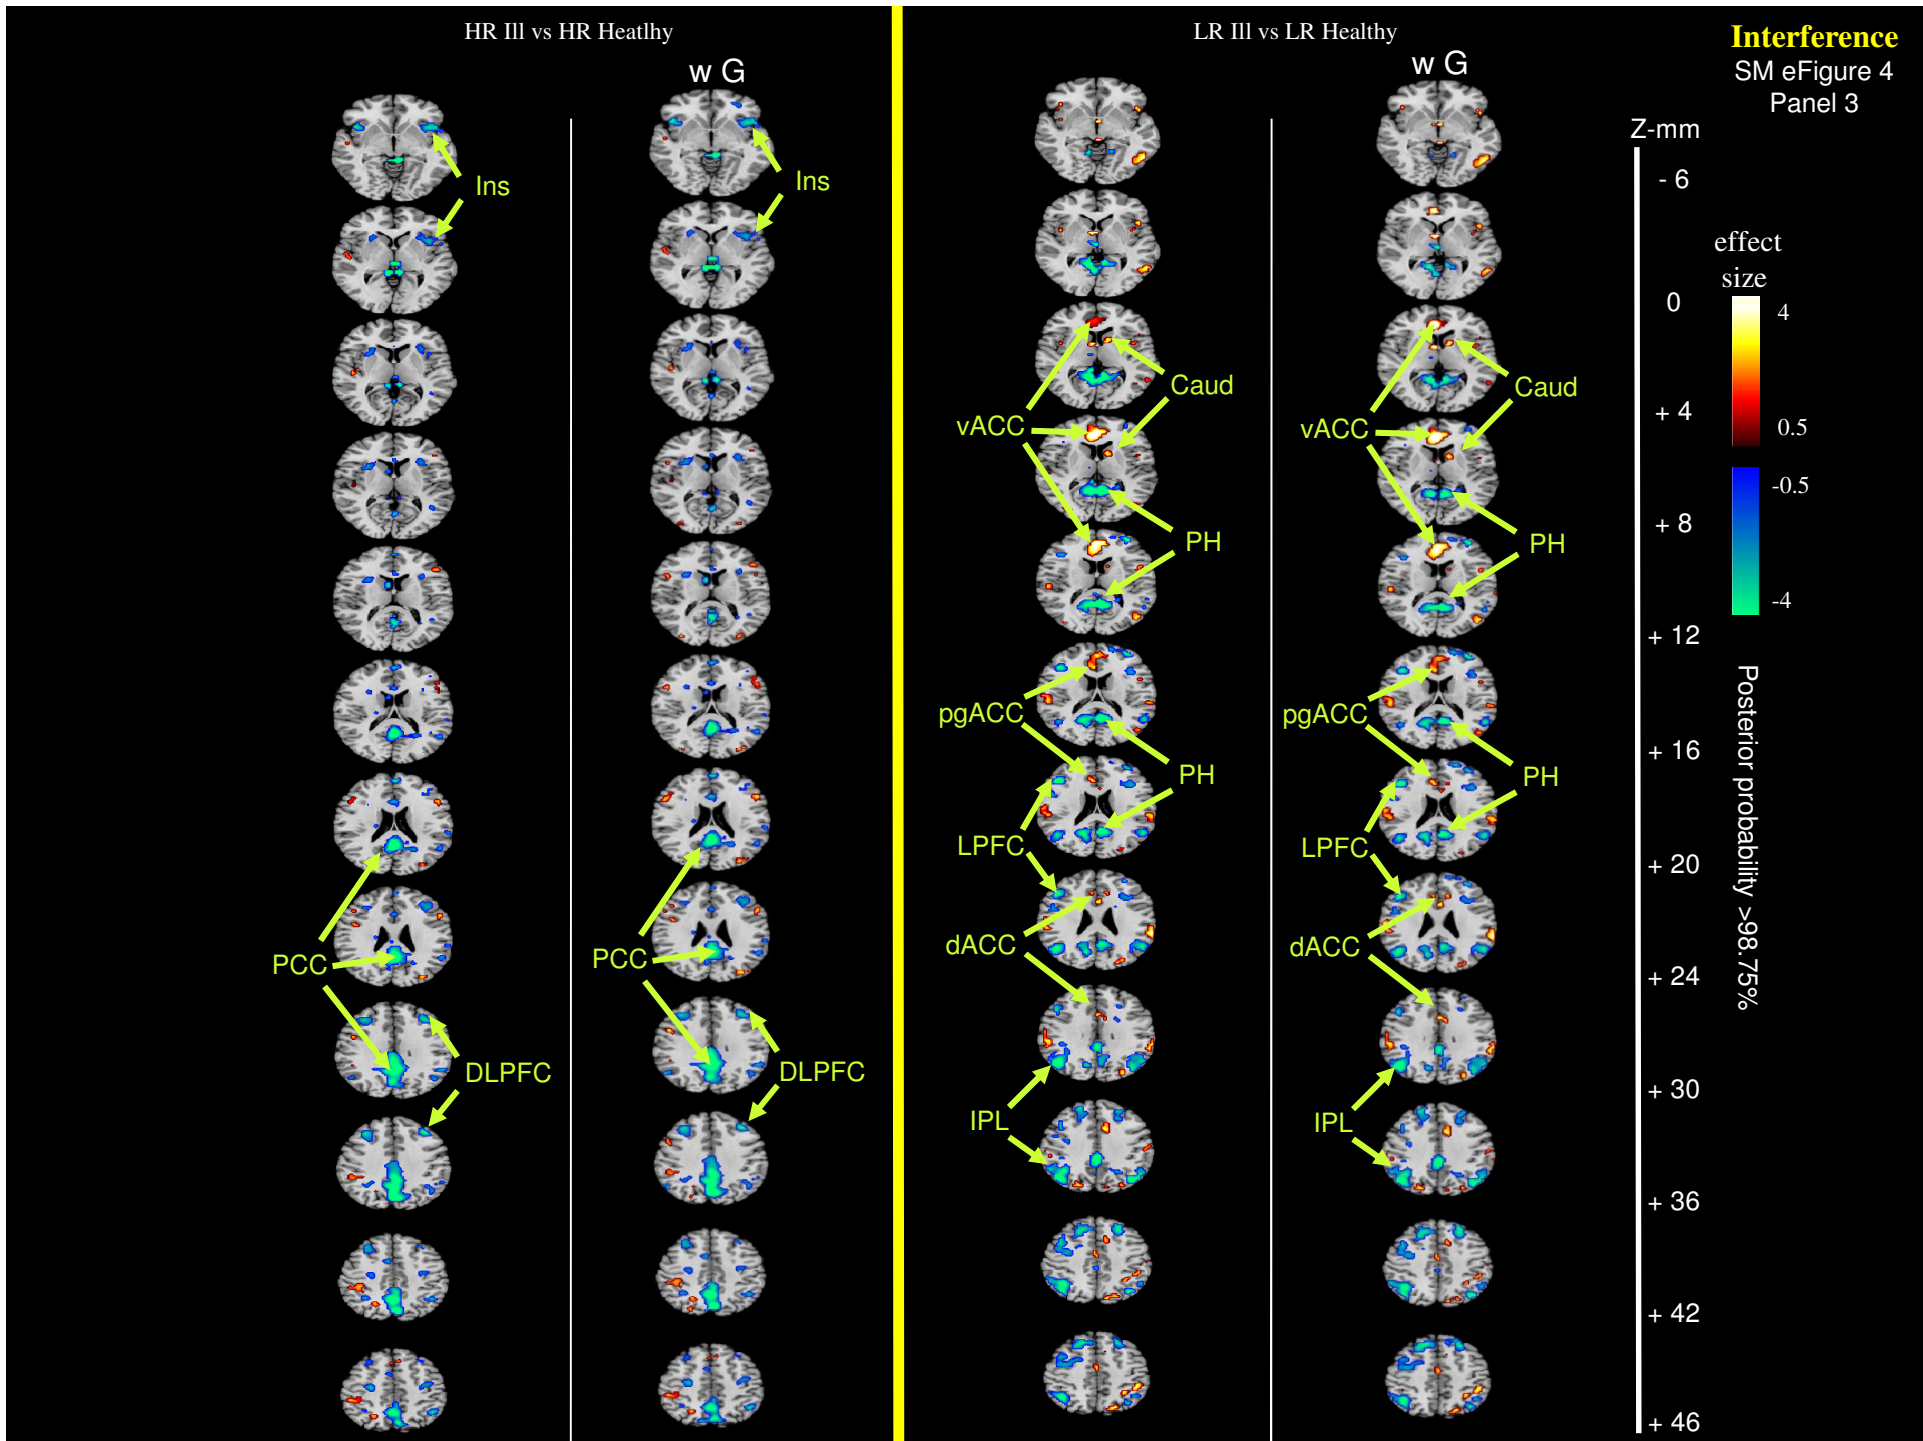

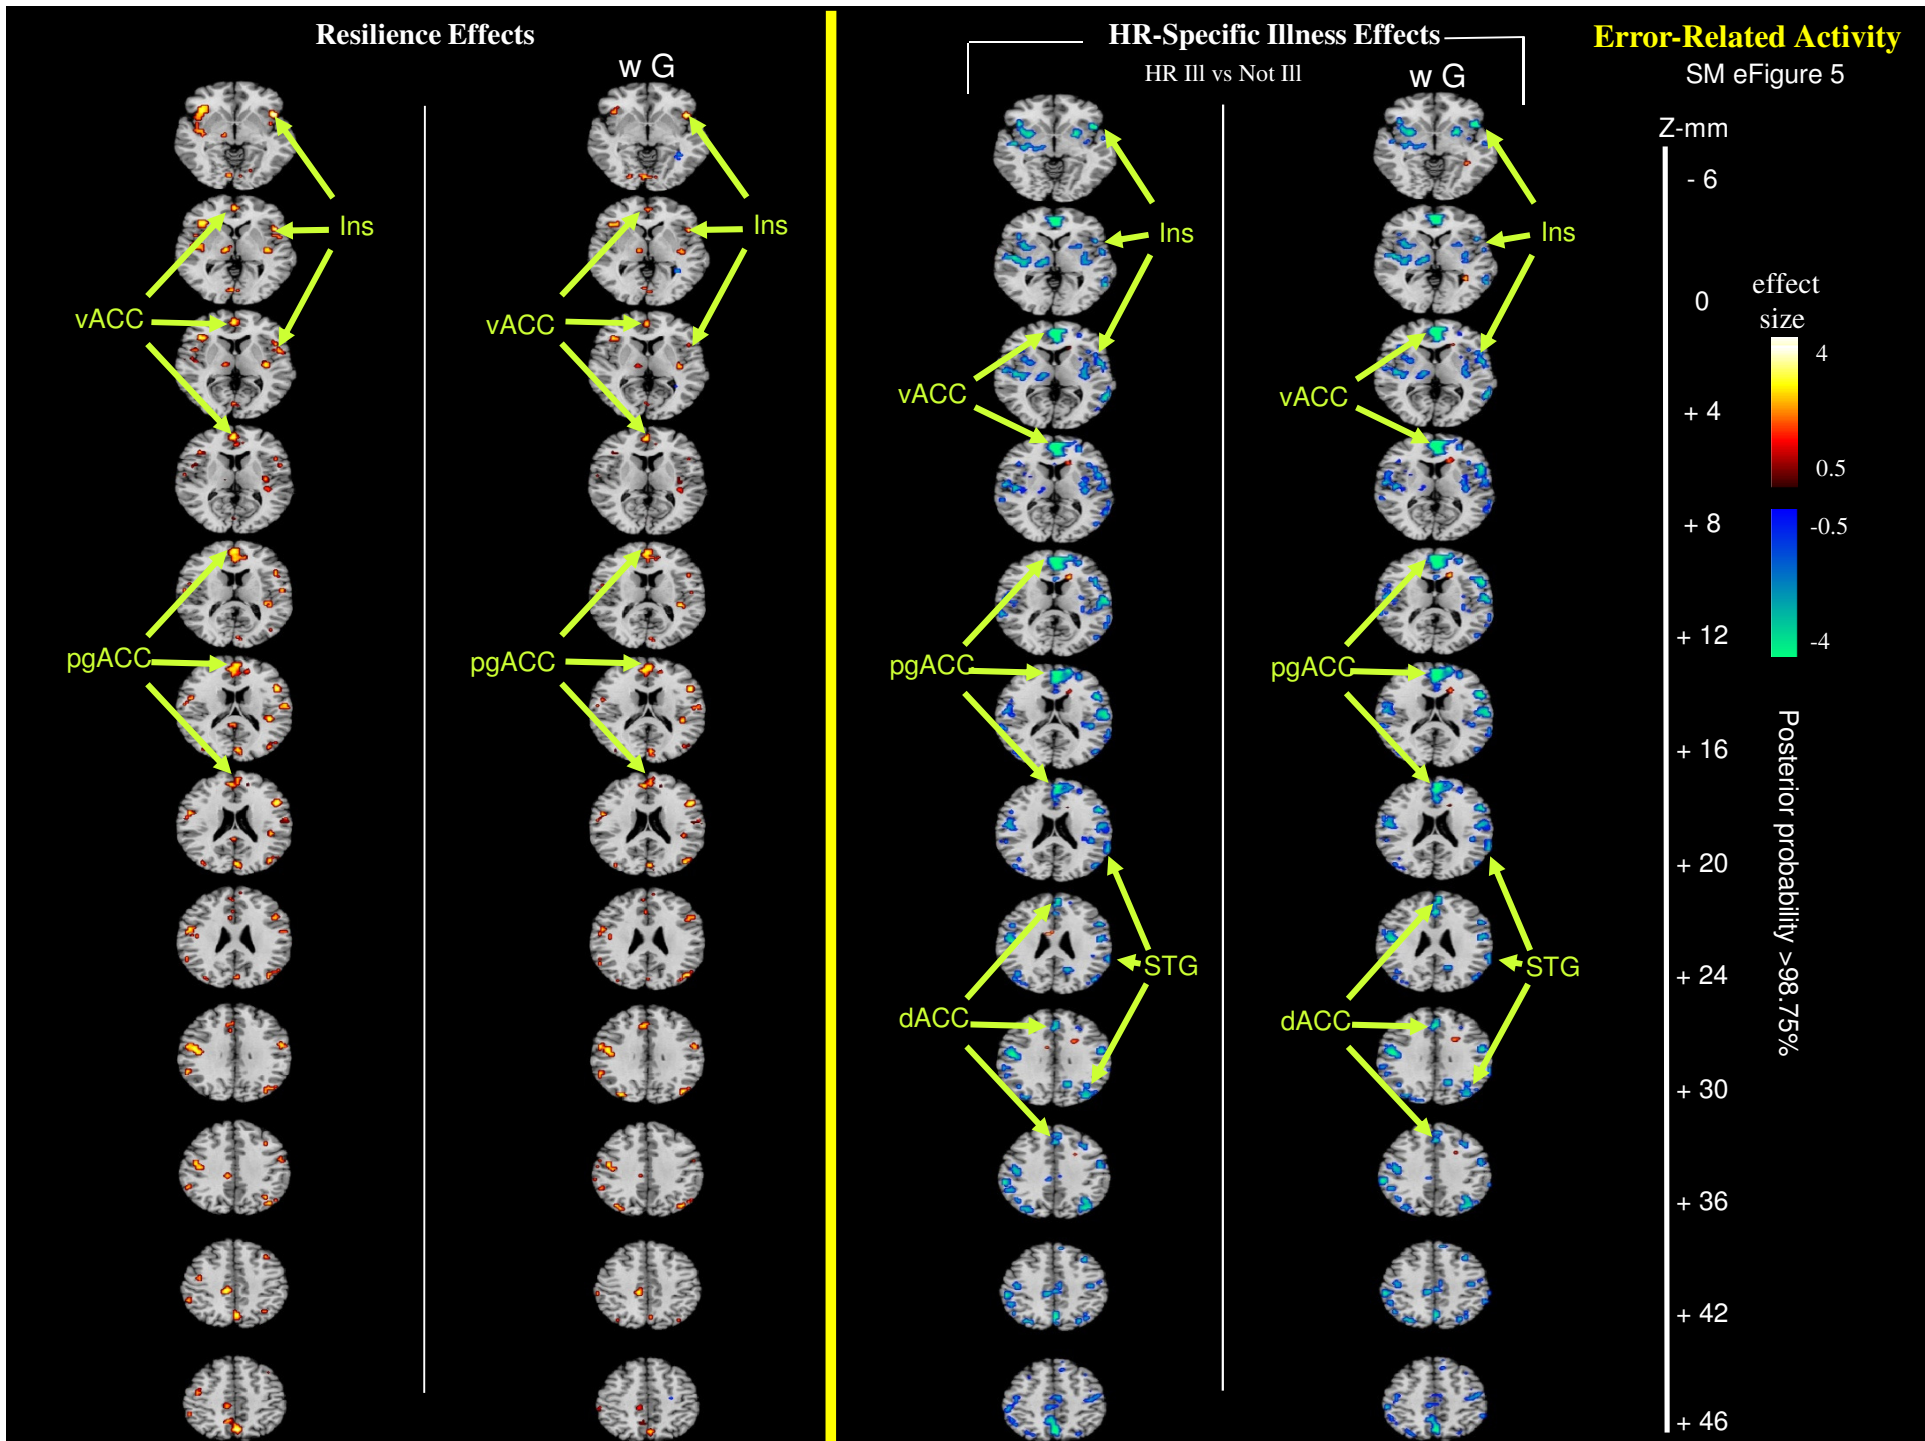



**e5**

**Findings when Excluding 25 Participants (N=20 HR, N=5 LR)**

**Taking Psychotropic Medications at the Time of Scan**

Risk, Resilience, and Illness Effects

Identified Using Regression Analyses

(covarying for age, sex, and interference effects)

# Interference-Related Activity

Excluding 25 Participants Taking Psychotropic Medications

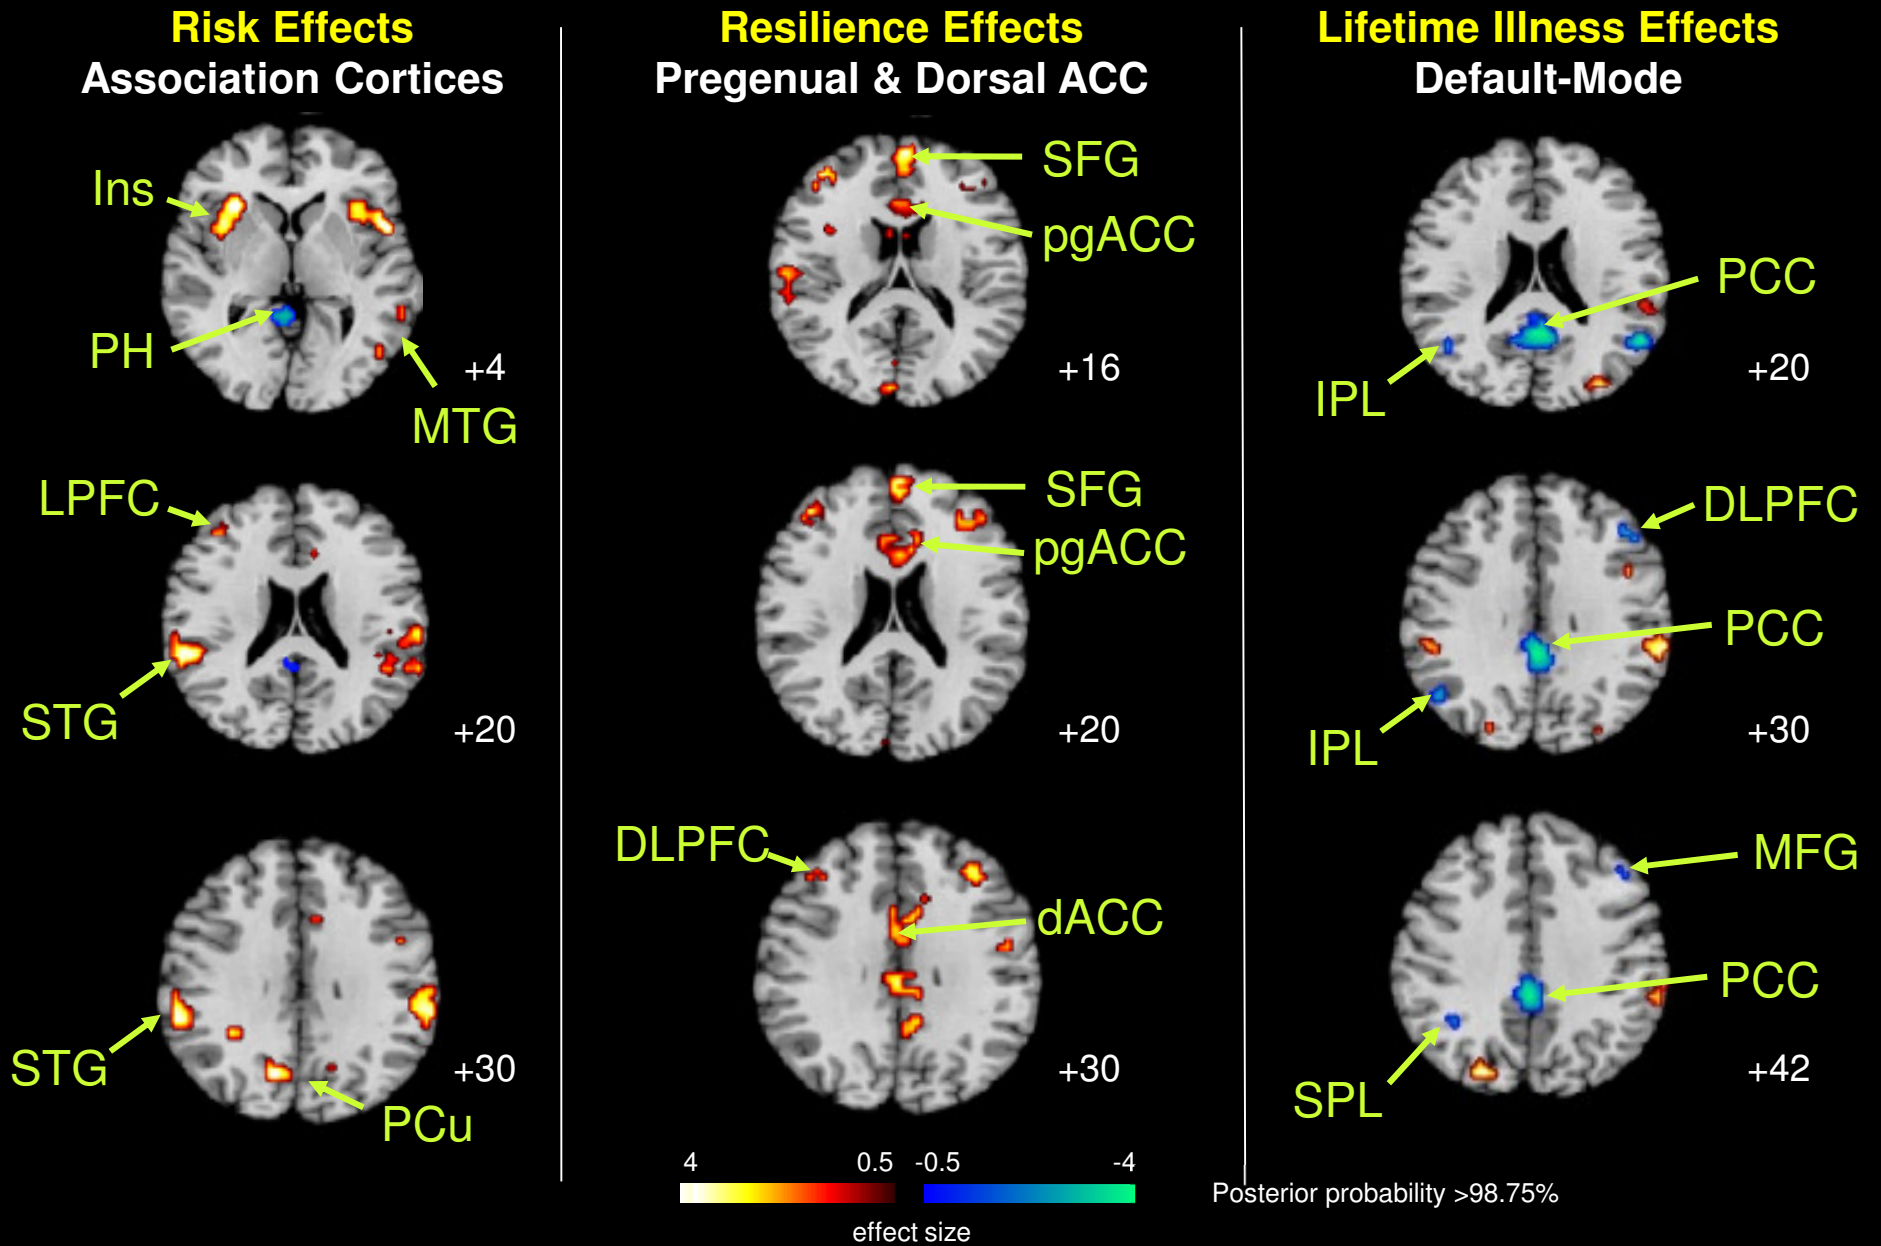

**e6**

**Findings when Excluding N=34 (HR=21, LR=13) Participants Who Had  
a Lifetime History of Abuse or Dependence  
on Either Drugs (N=23; HR 17, LR 6) or Alcohol (N=24; HR 24, LR 8)**

Risk, Resilience, and Illness Effects  
Identified Using Regression Analyses  
(covarying for age, sex, and interference effects)



# Interference-Related Activity

## Risk Effects

SM eFigure 7  
Panel 1

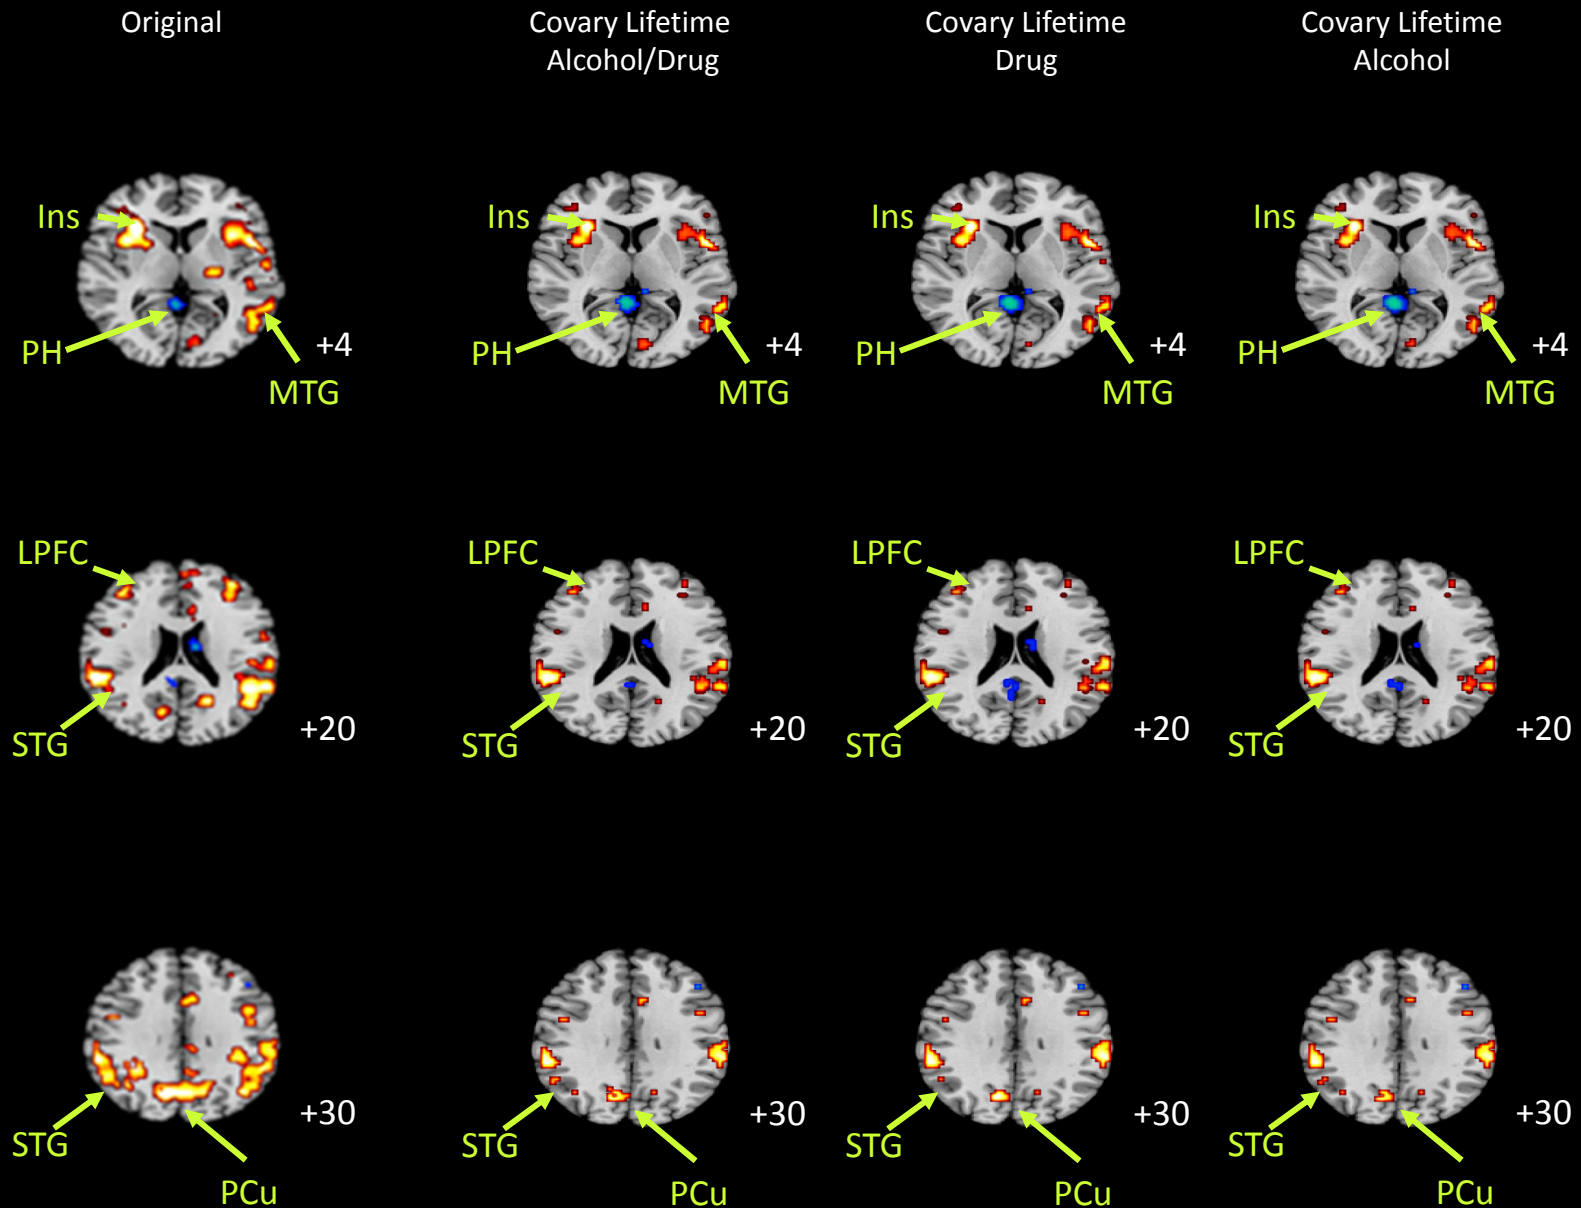

# Interference-Related Activity

## Resilience Effects

SM eFigure 7  
Panel 2

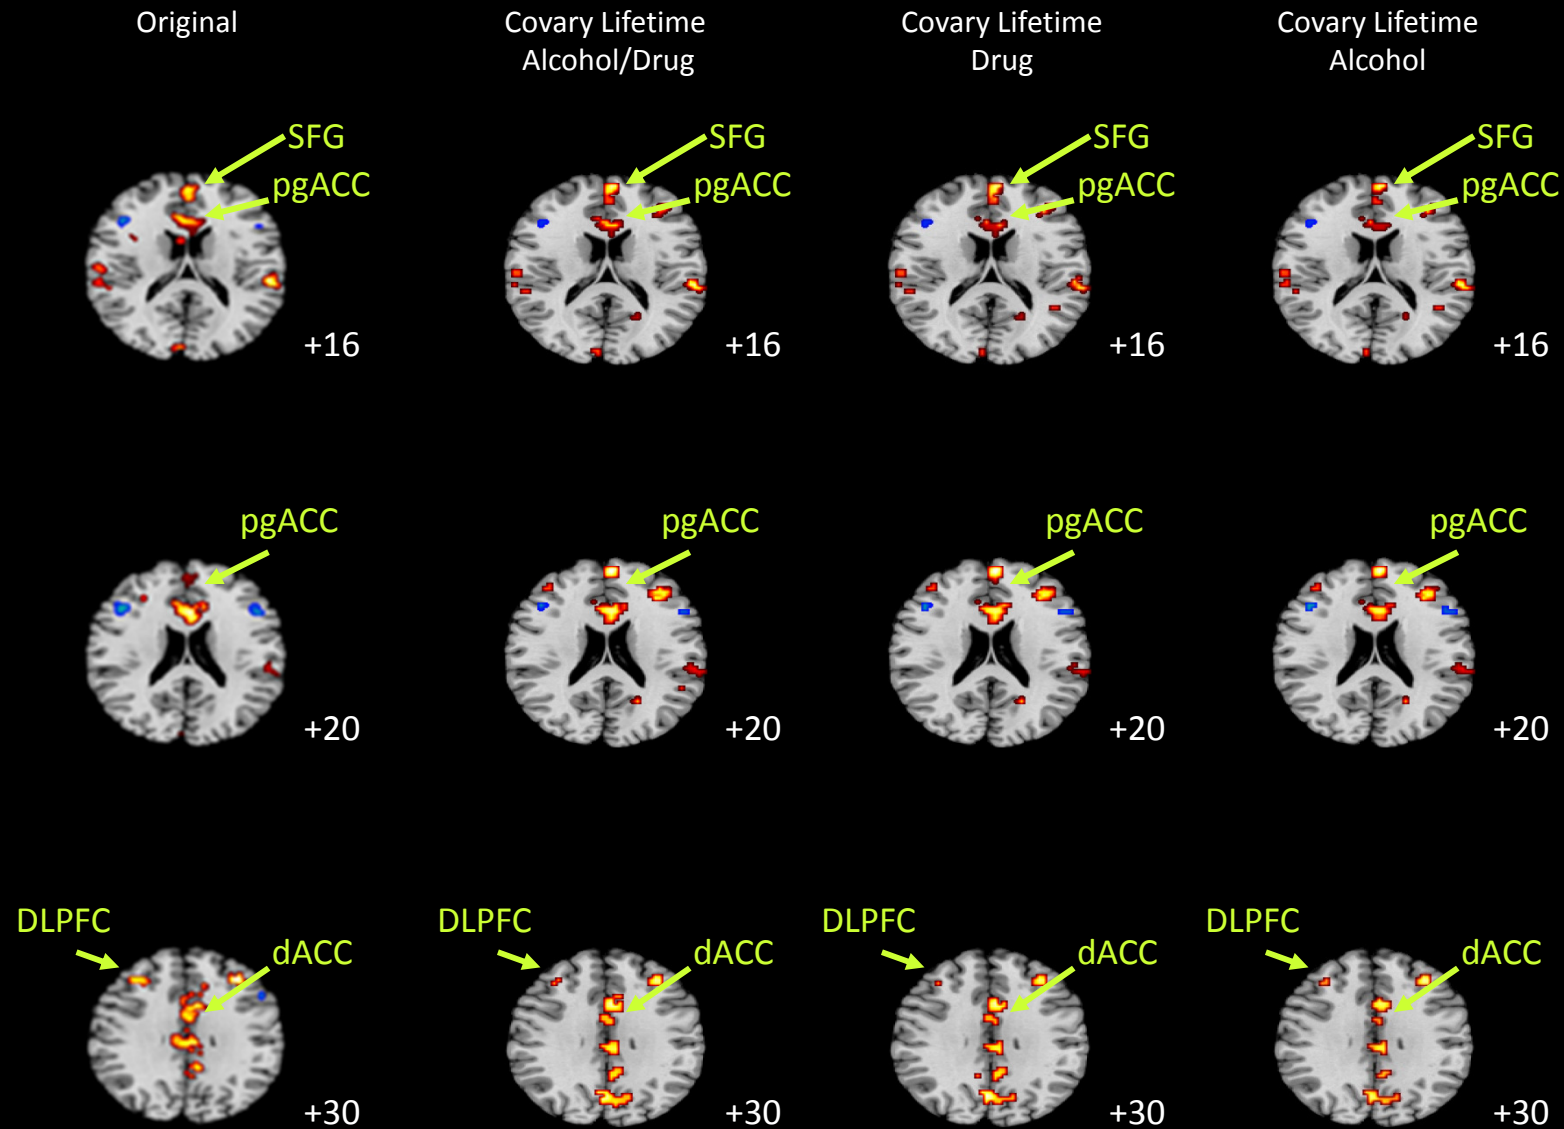

# Interference-Related Activity

## Lifetime Illness Effects

SM eFigure 7  
Panel 3

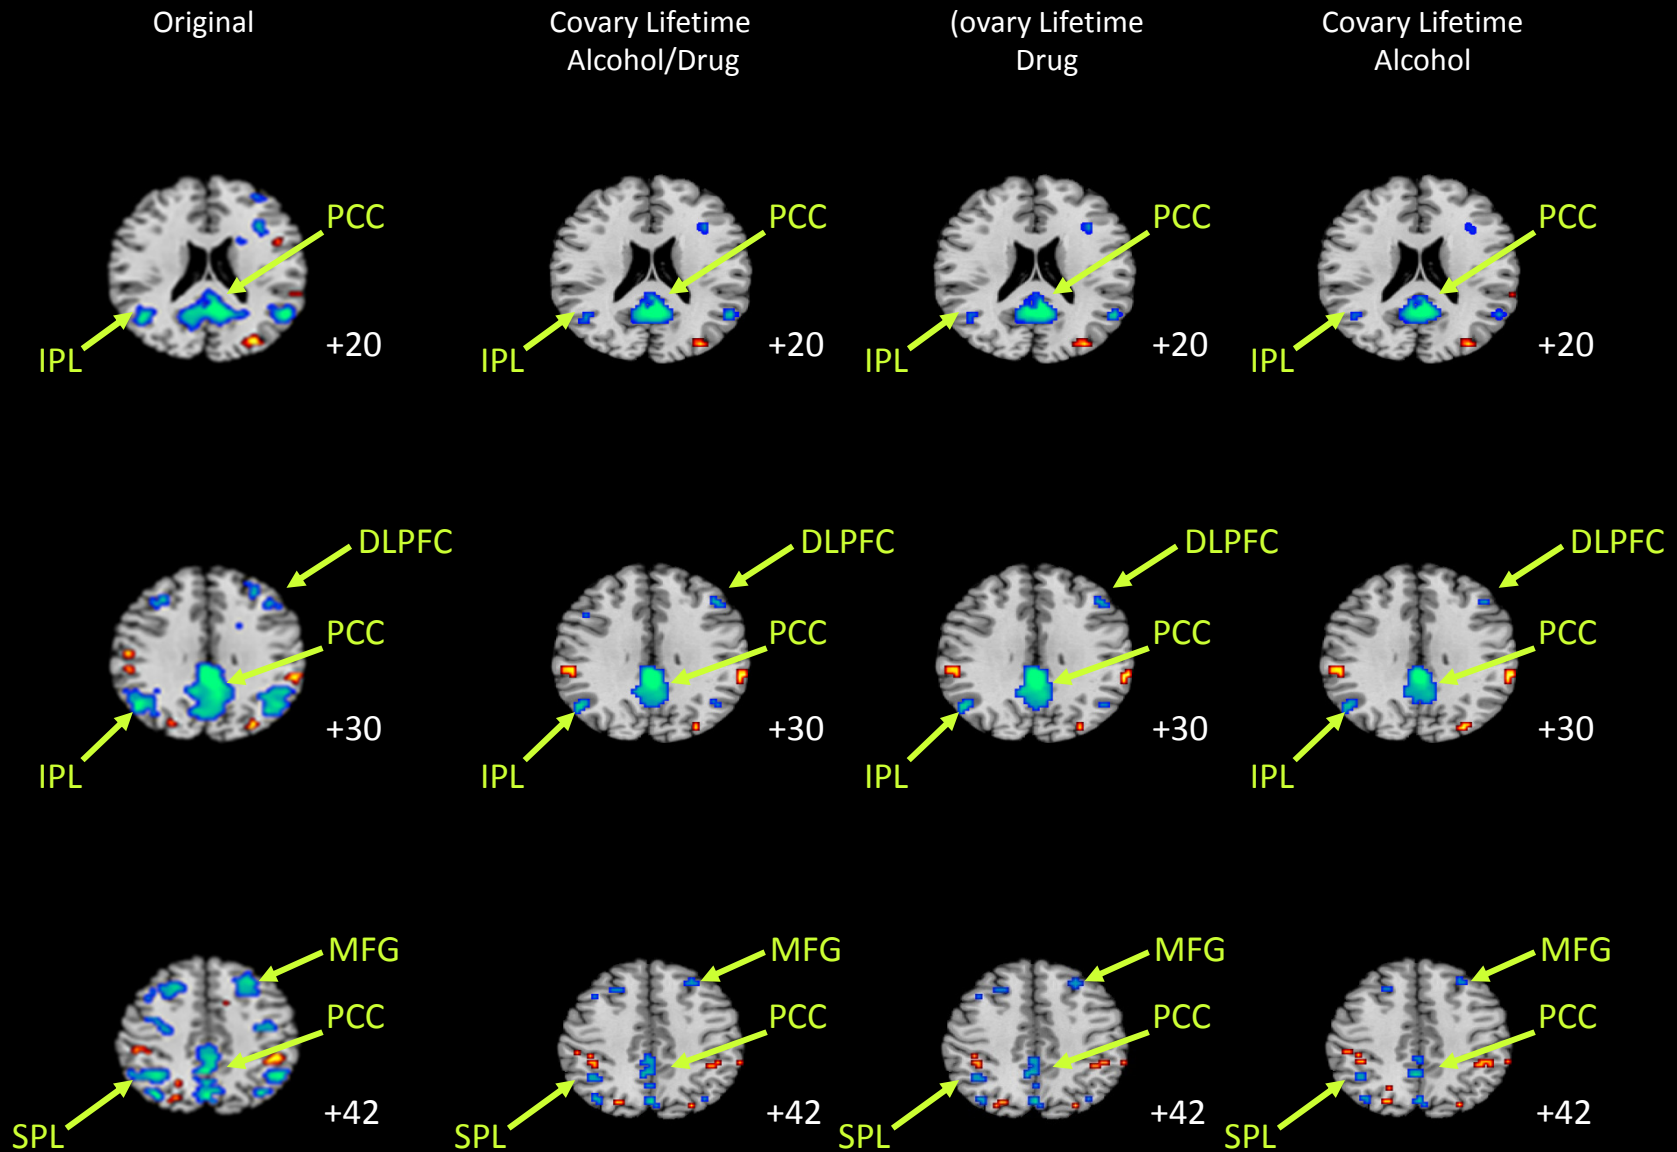

# Error-Related Activity

## Resilience Effects

SM eFigure 7  
Panel 4

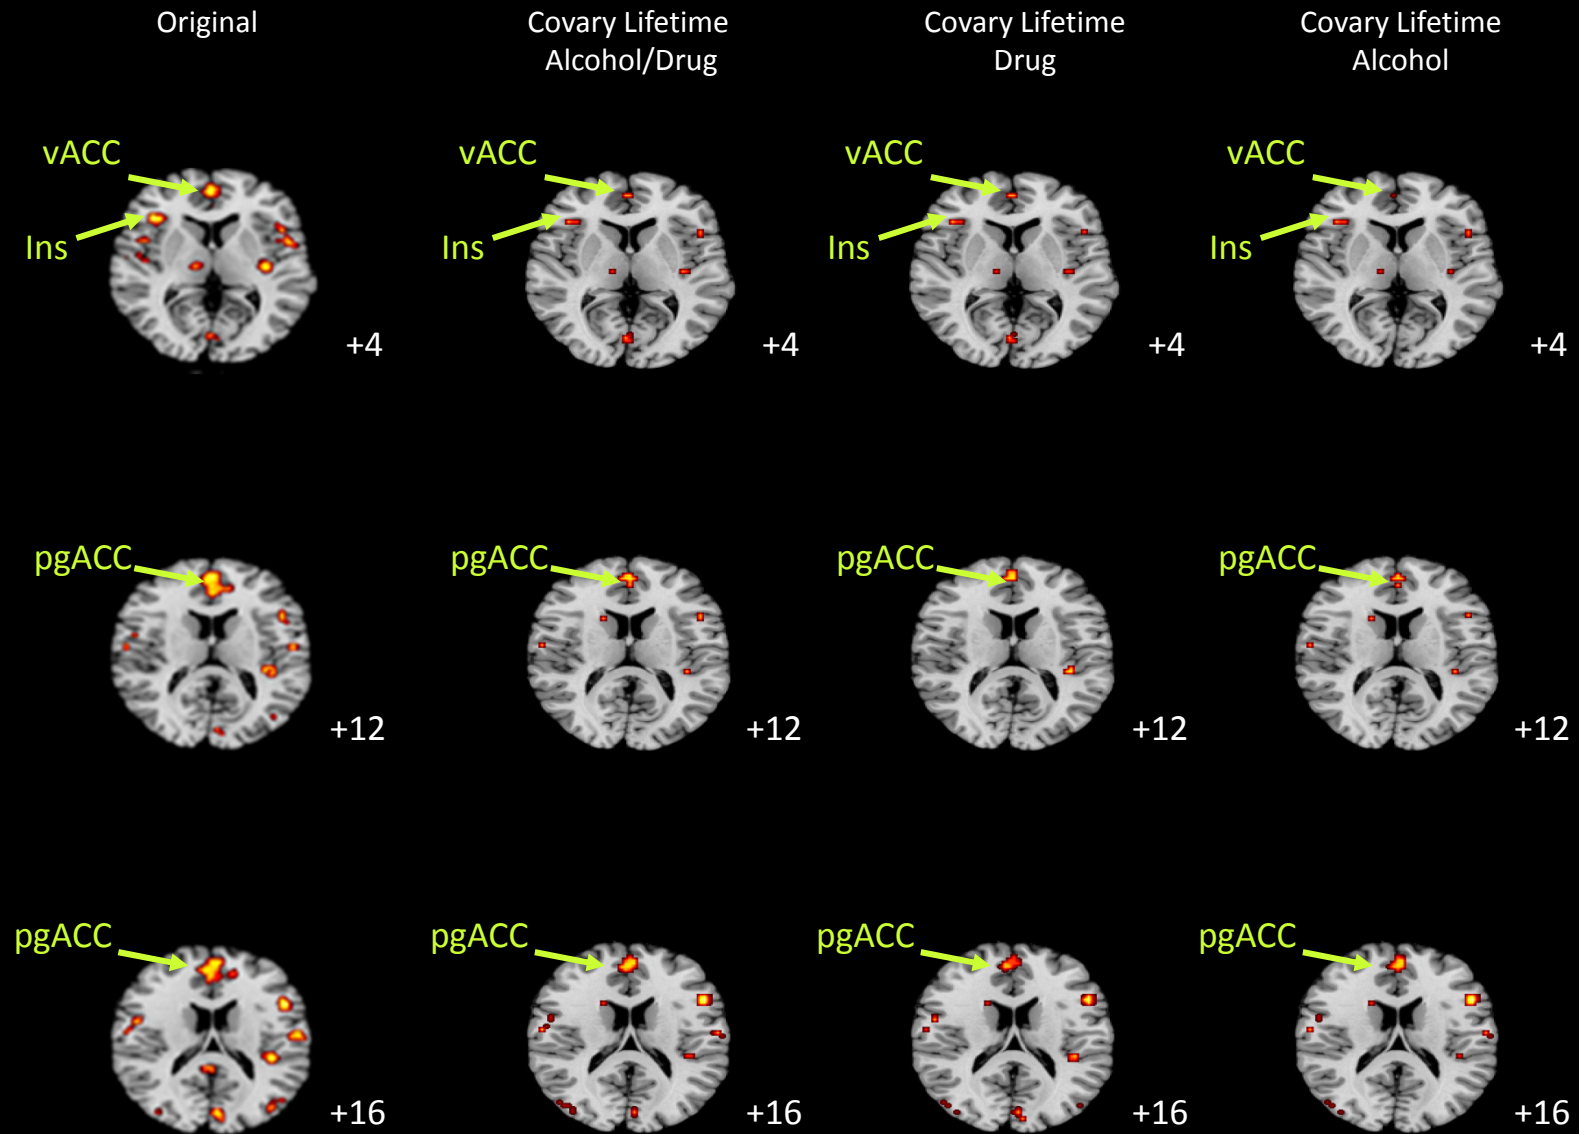

# Error-Related Activity

## HR Illness Effects

SM eFigure 7  
Panel 5

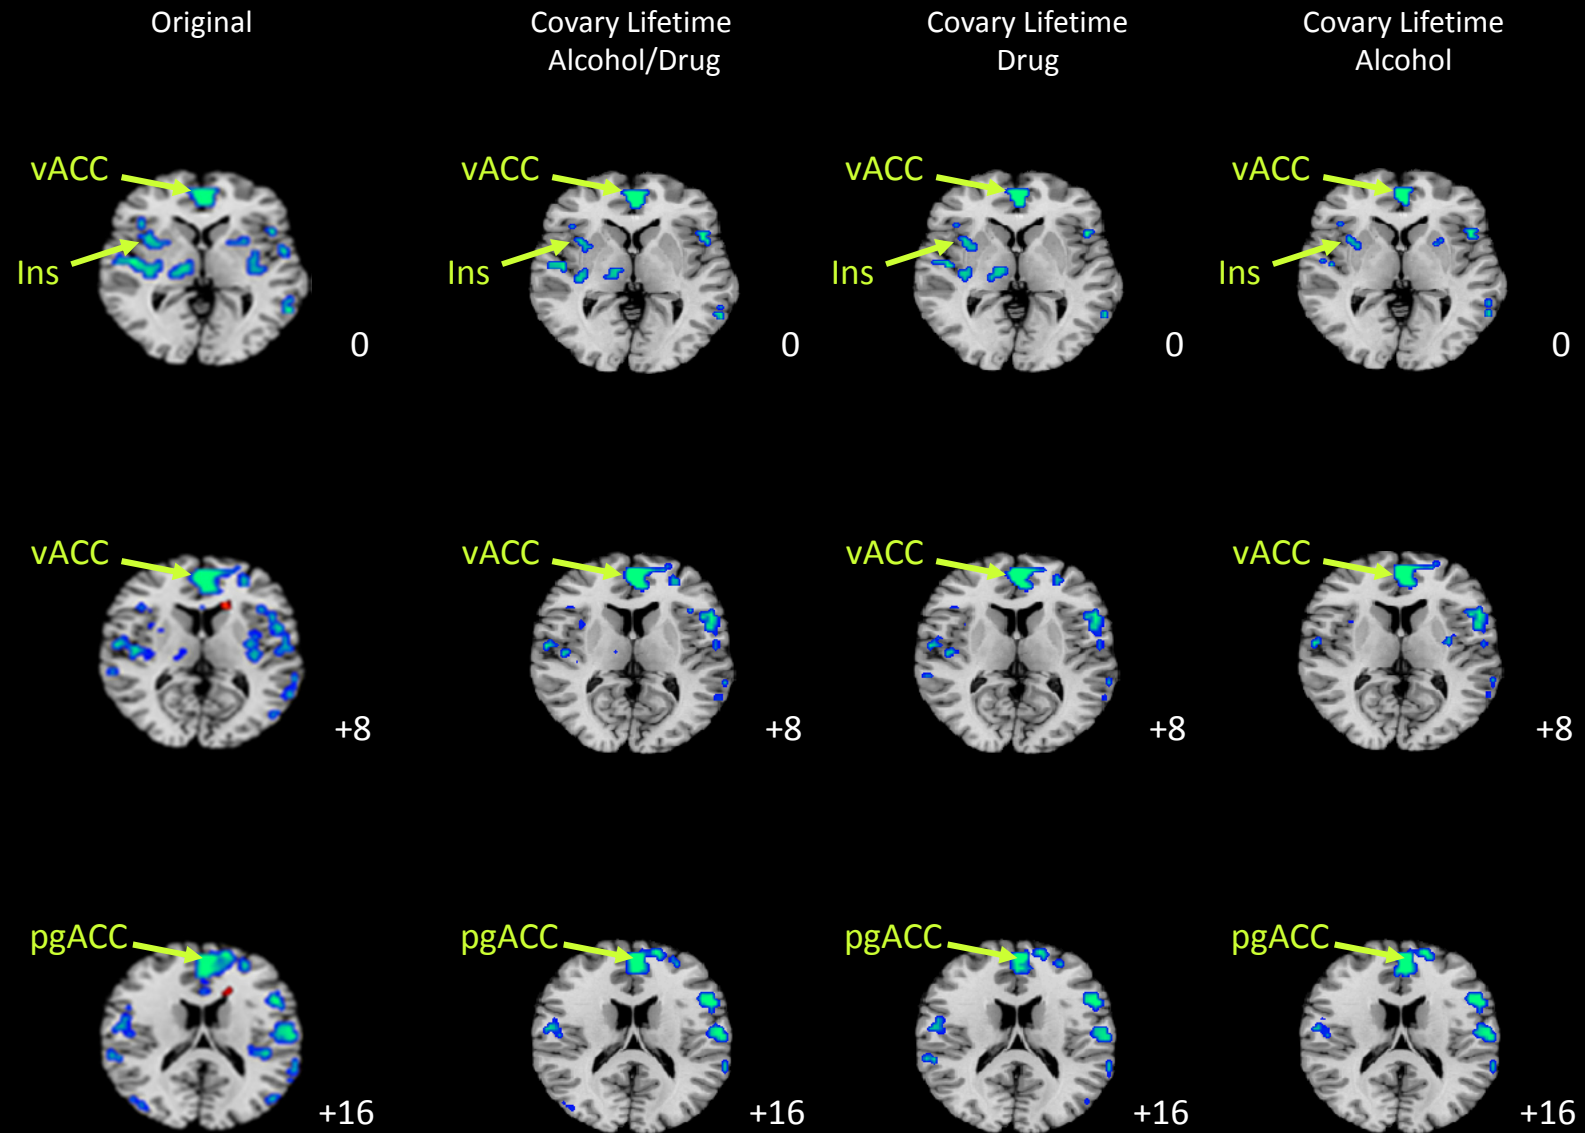



# Interference-Related Activity

## Risk Effects

SM eFigure 7  
Panel 6

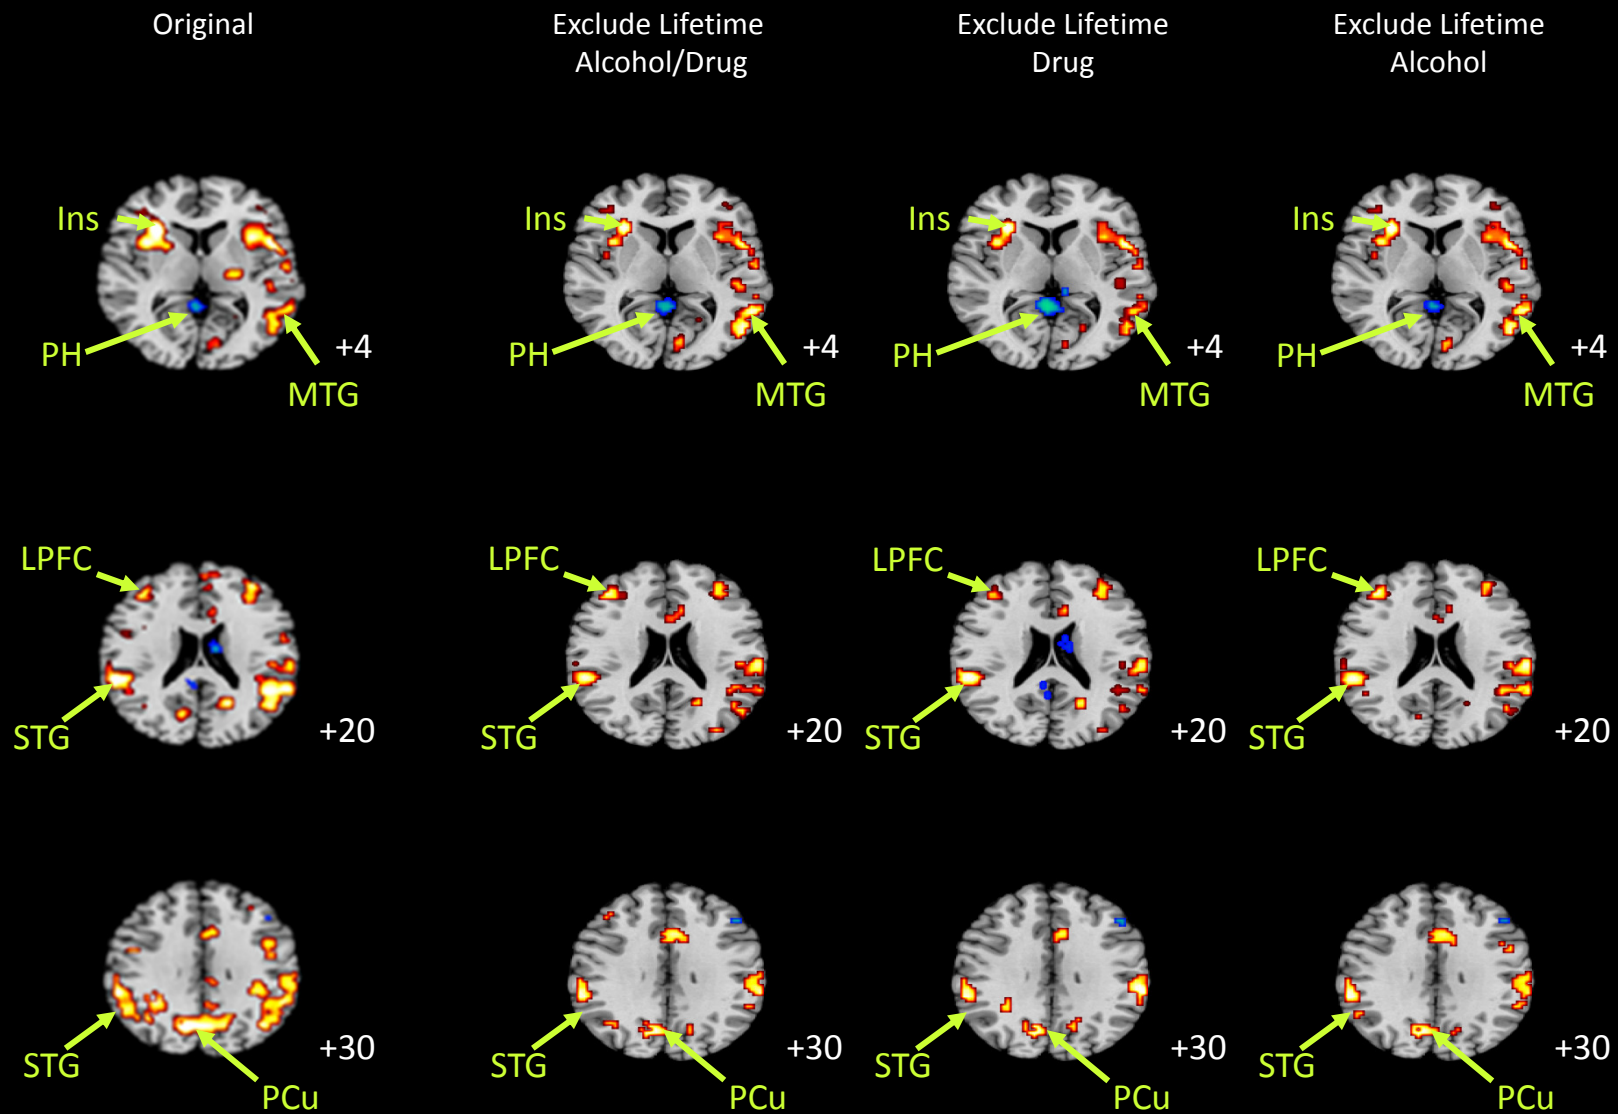

# Interference-Related Activity Resilience Effects

SM eFigure 7  
Panel 7

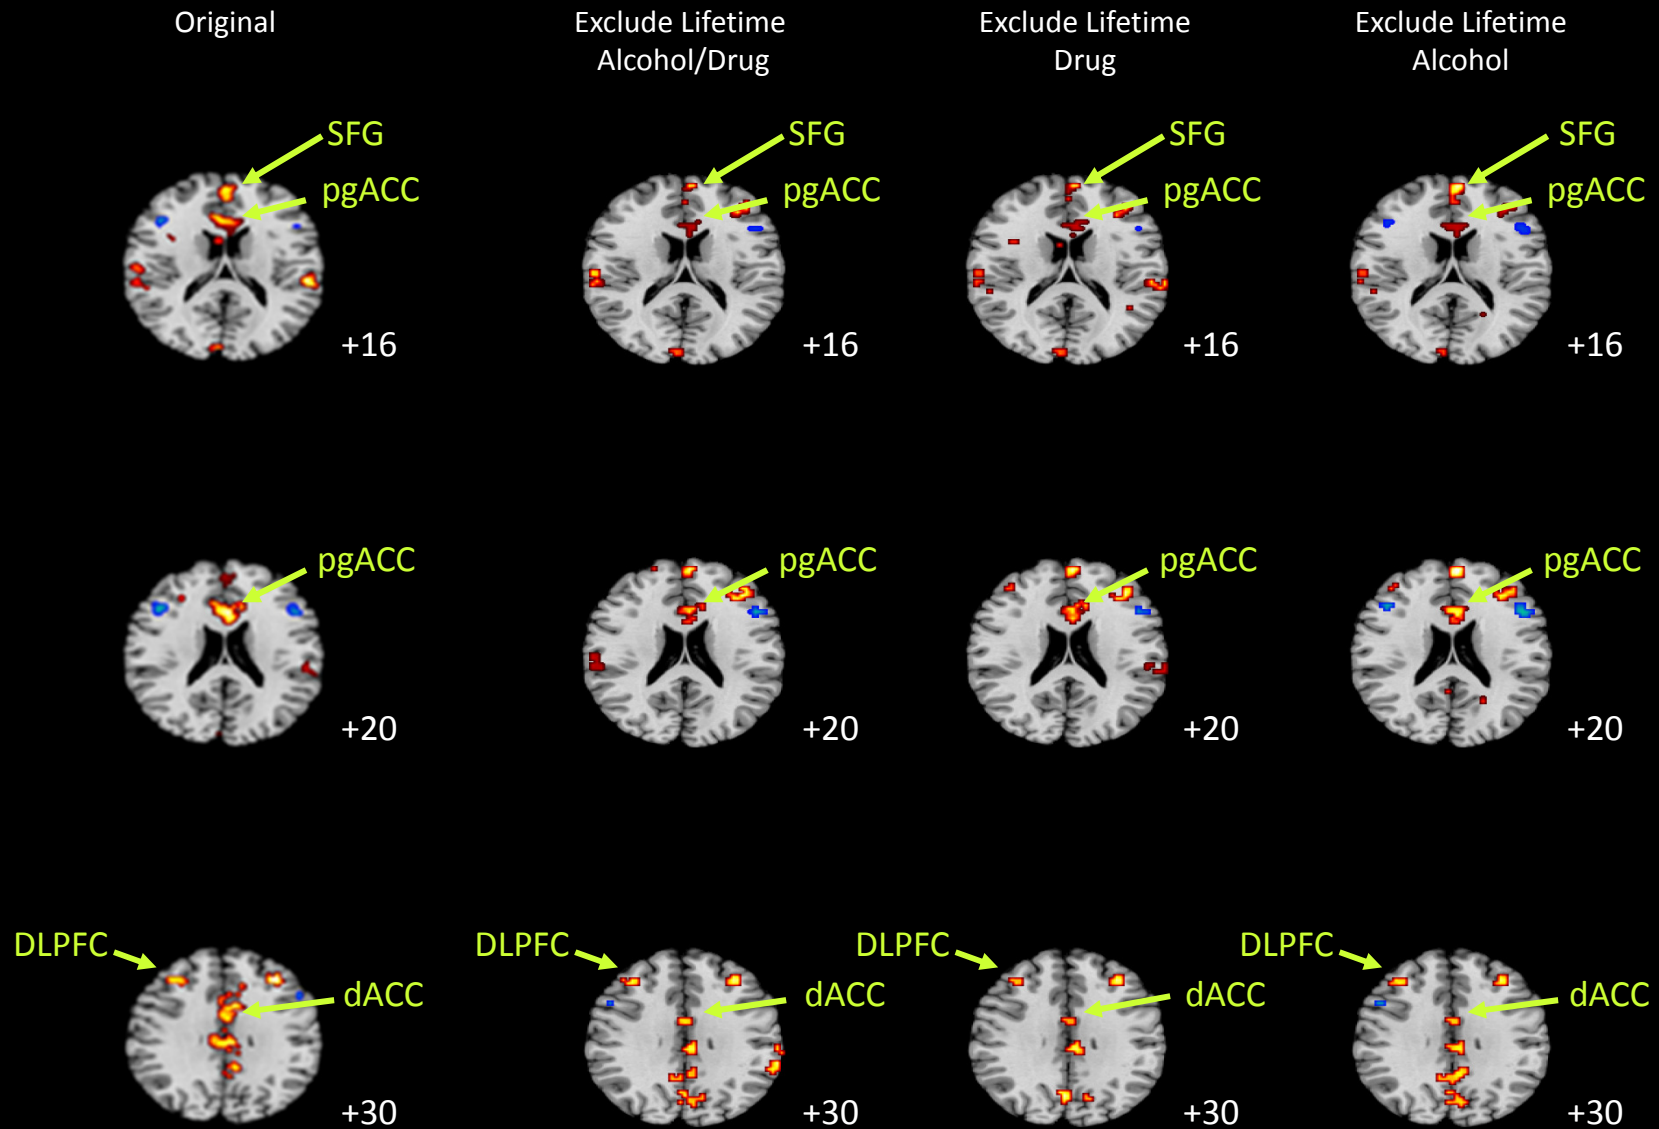

# Interference-Related Activity

## Lifetime Illness Effects

SM eFigure 7  
Panel 8

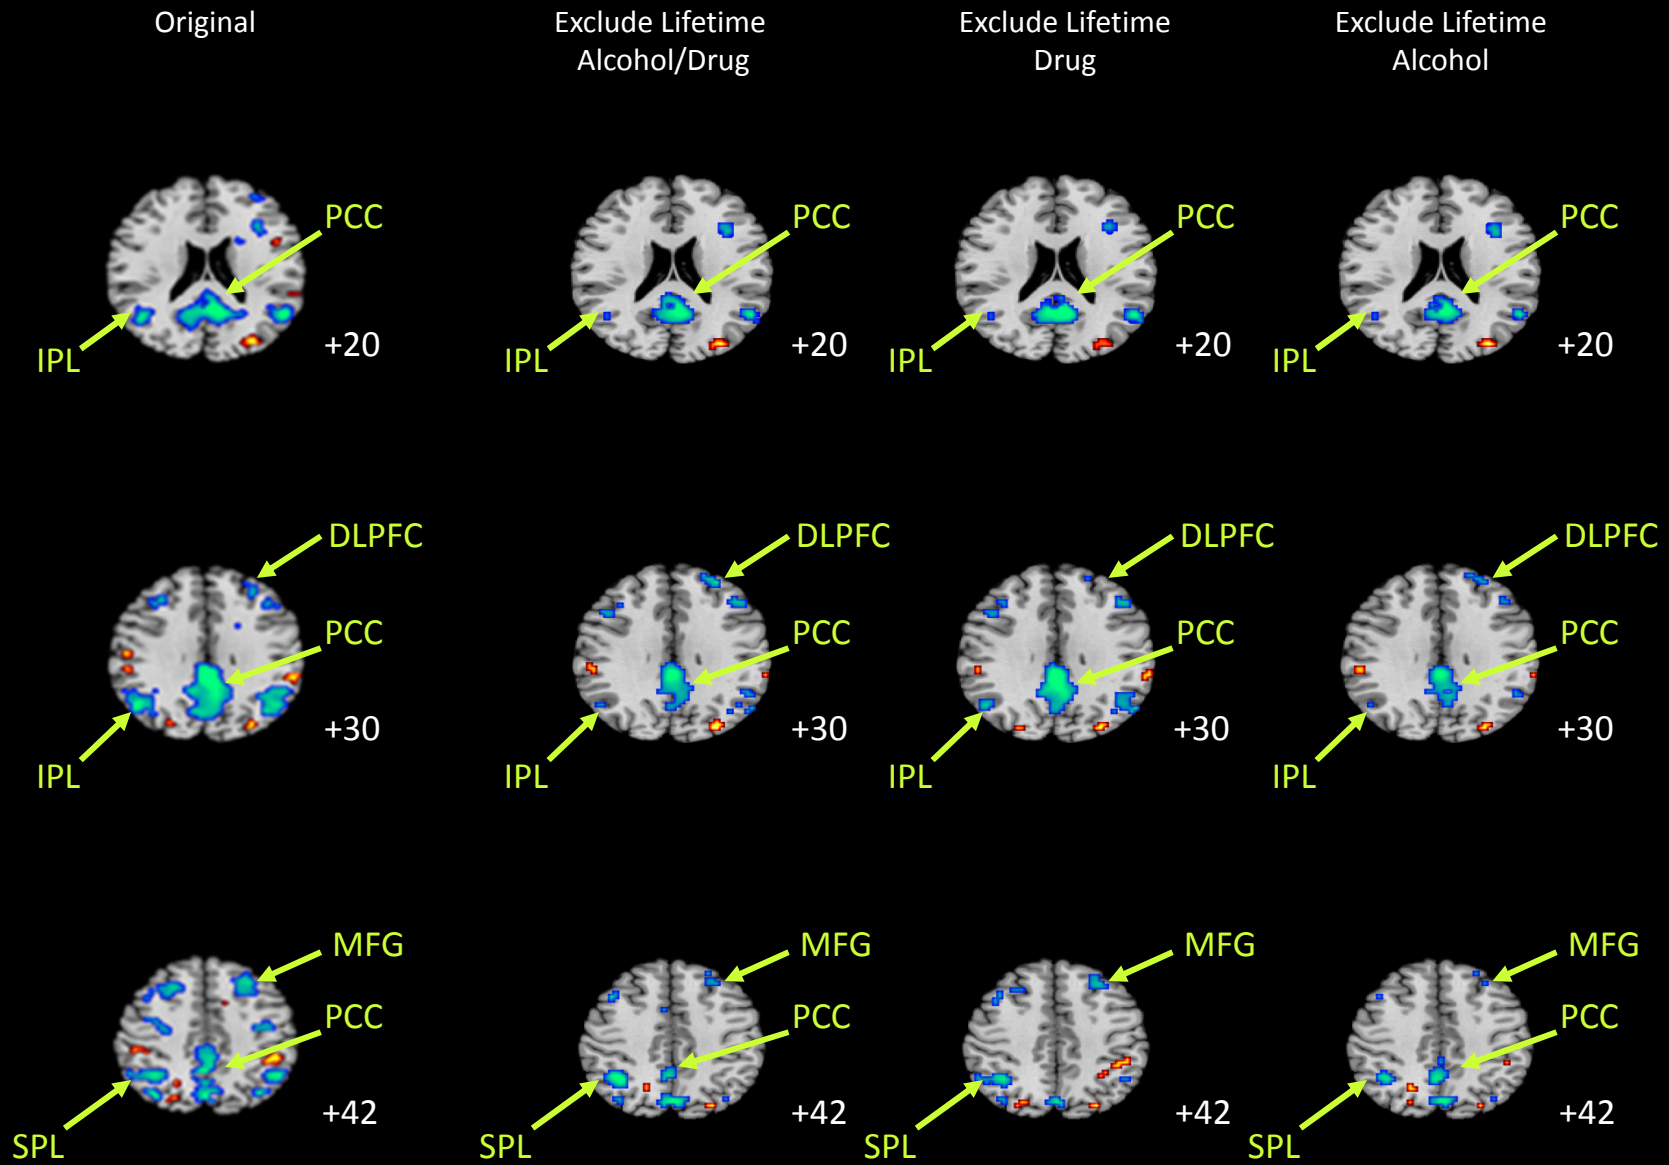

# Error-Related Activity

## Resilience Effects

SM eFigure 7  
Panel 9

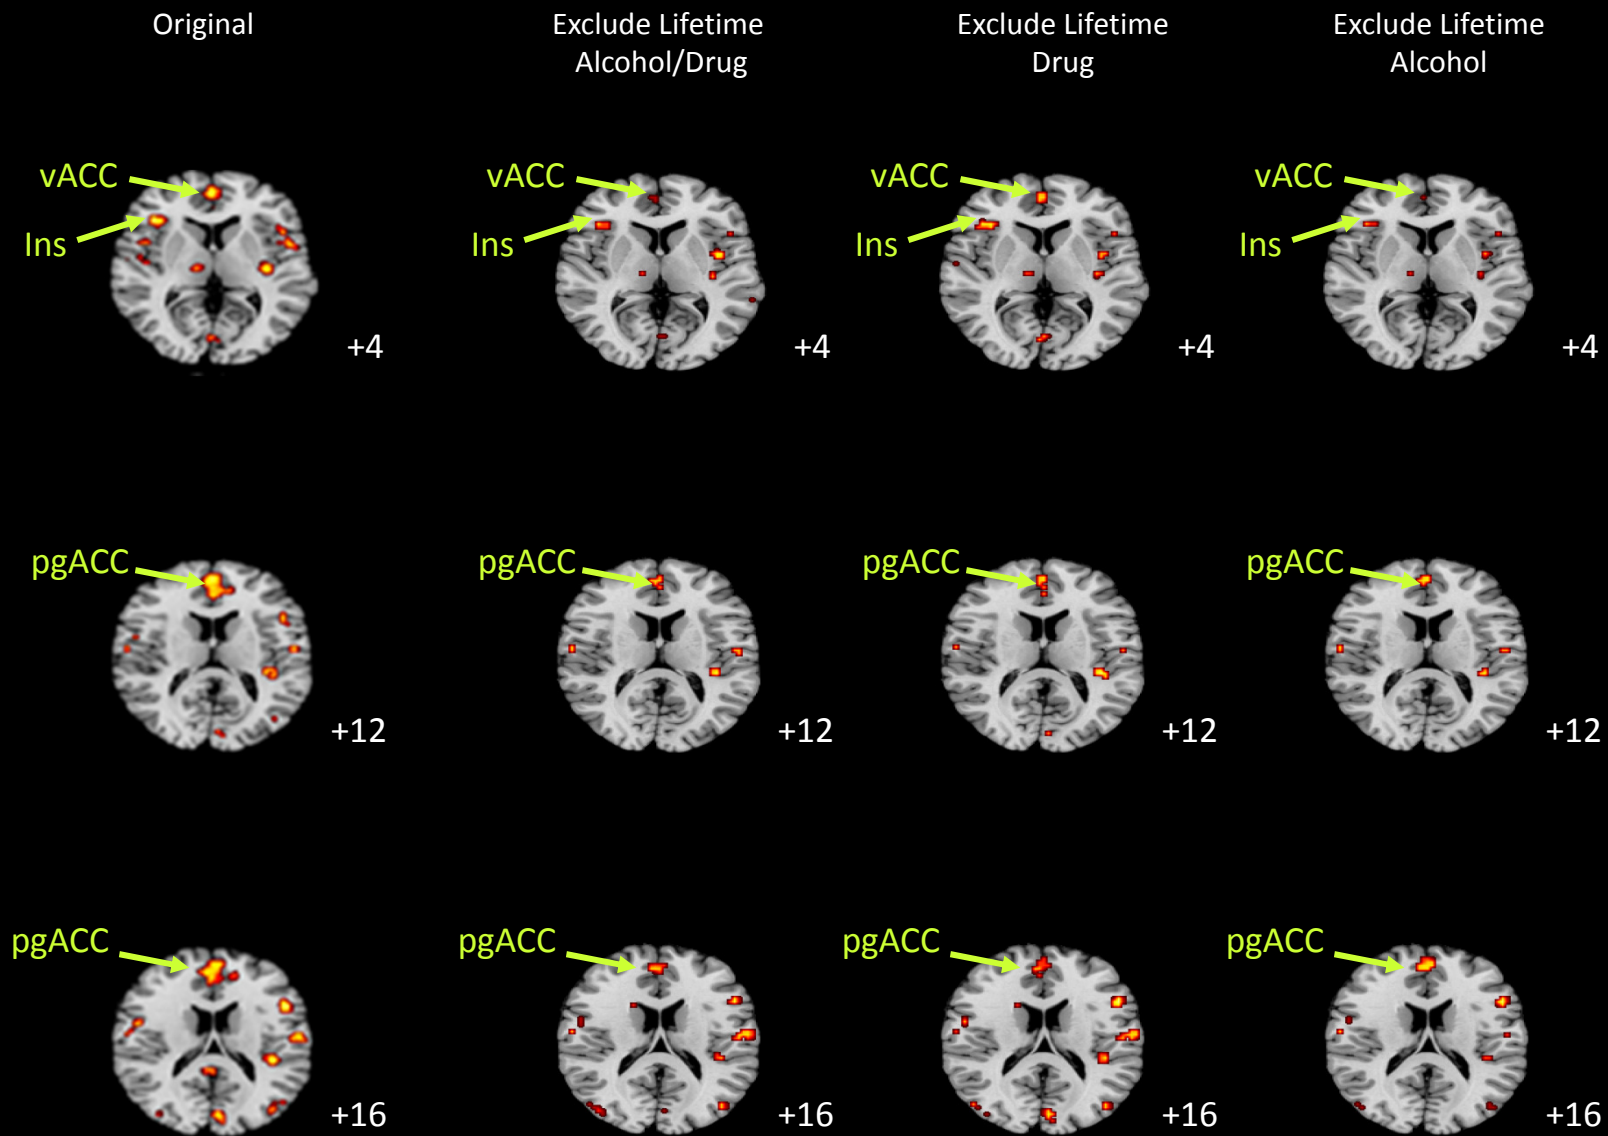

# Error-Related Activity

## HR Illness Effects

SM eFigure 7  
Panel 10

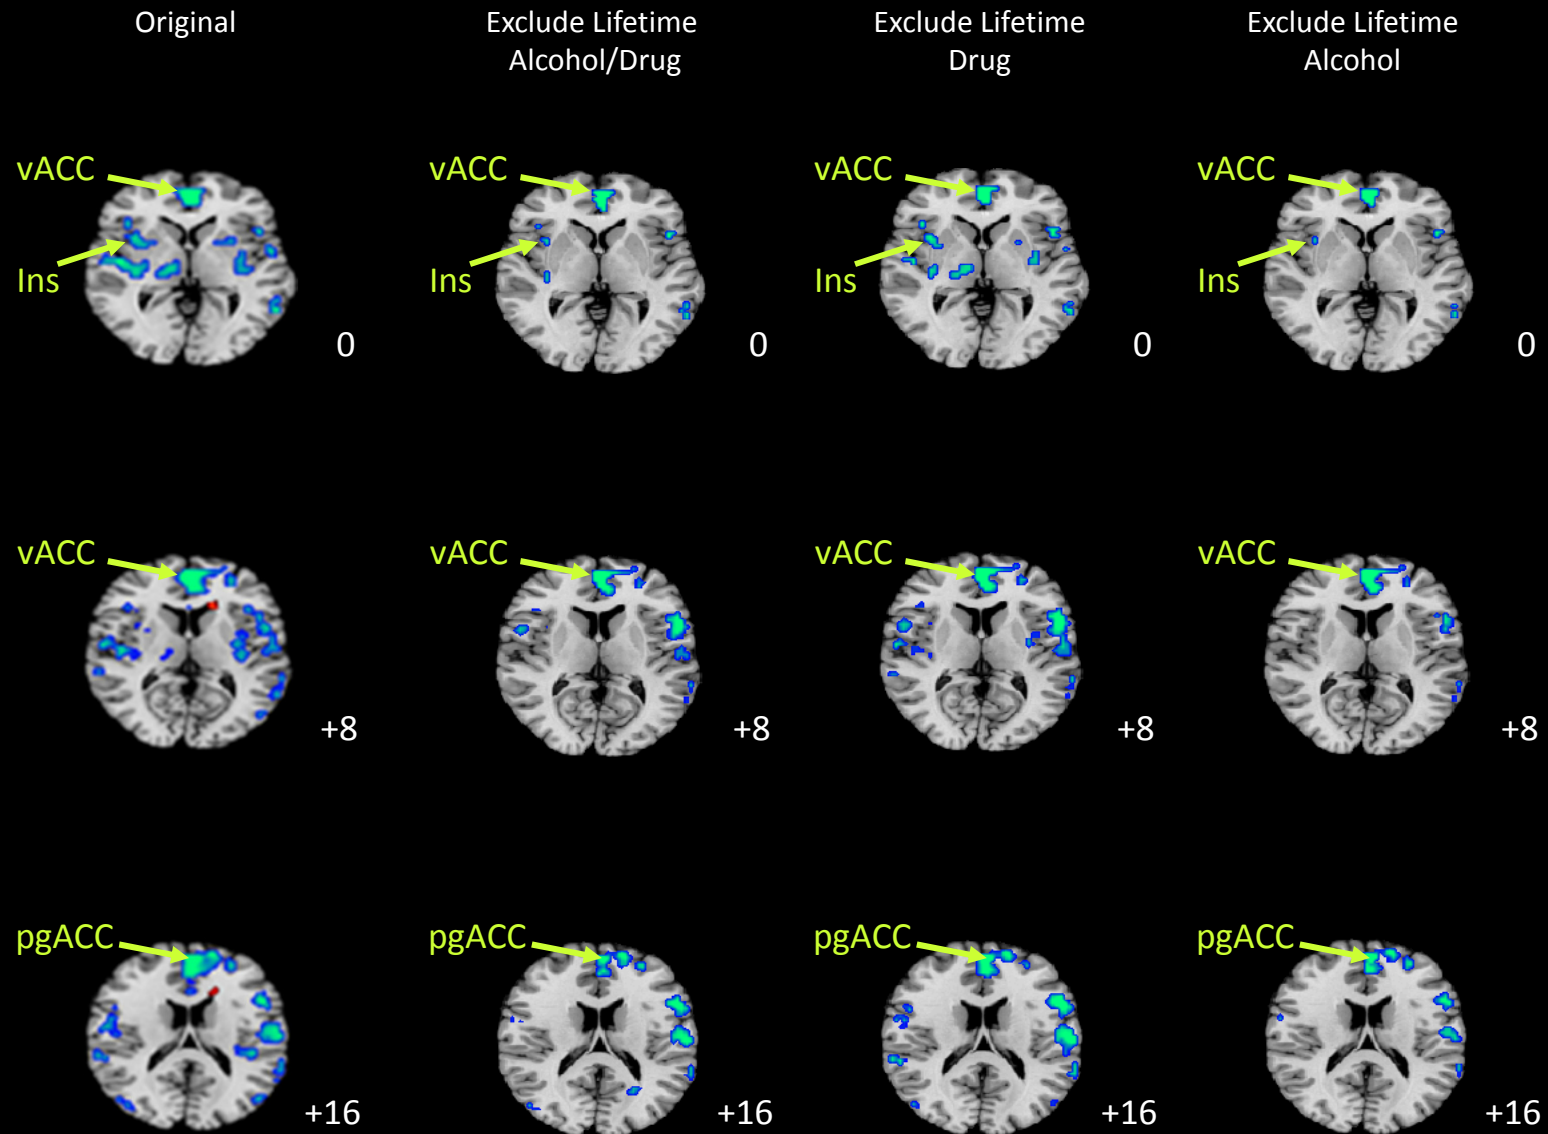



**e7**

**Average of Activation Maps from 10 Random Samplings of 6 Females with MDD/Anxiety  
to Demographically Match 6 Females without MDD/Anxiety,  
Yielding 10 Subsamples of the Total Group,  
with N=109 (49 HR, 60 LR) in Each Random Sample**

Identification of Risk, Resilience, and Illness Effects  
(covarying for age and interference effects)

# Interference-Related Activity: Risk Effects

SM eFigure 8  
Panel 1

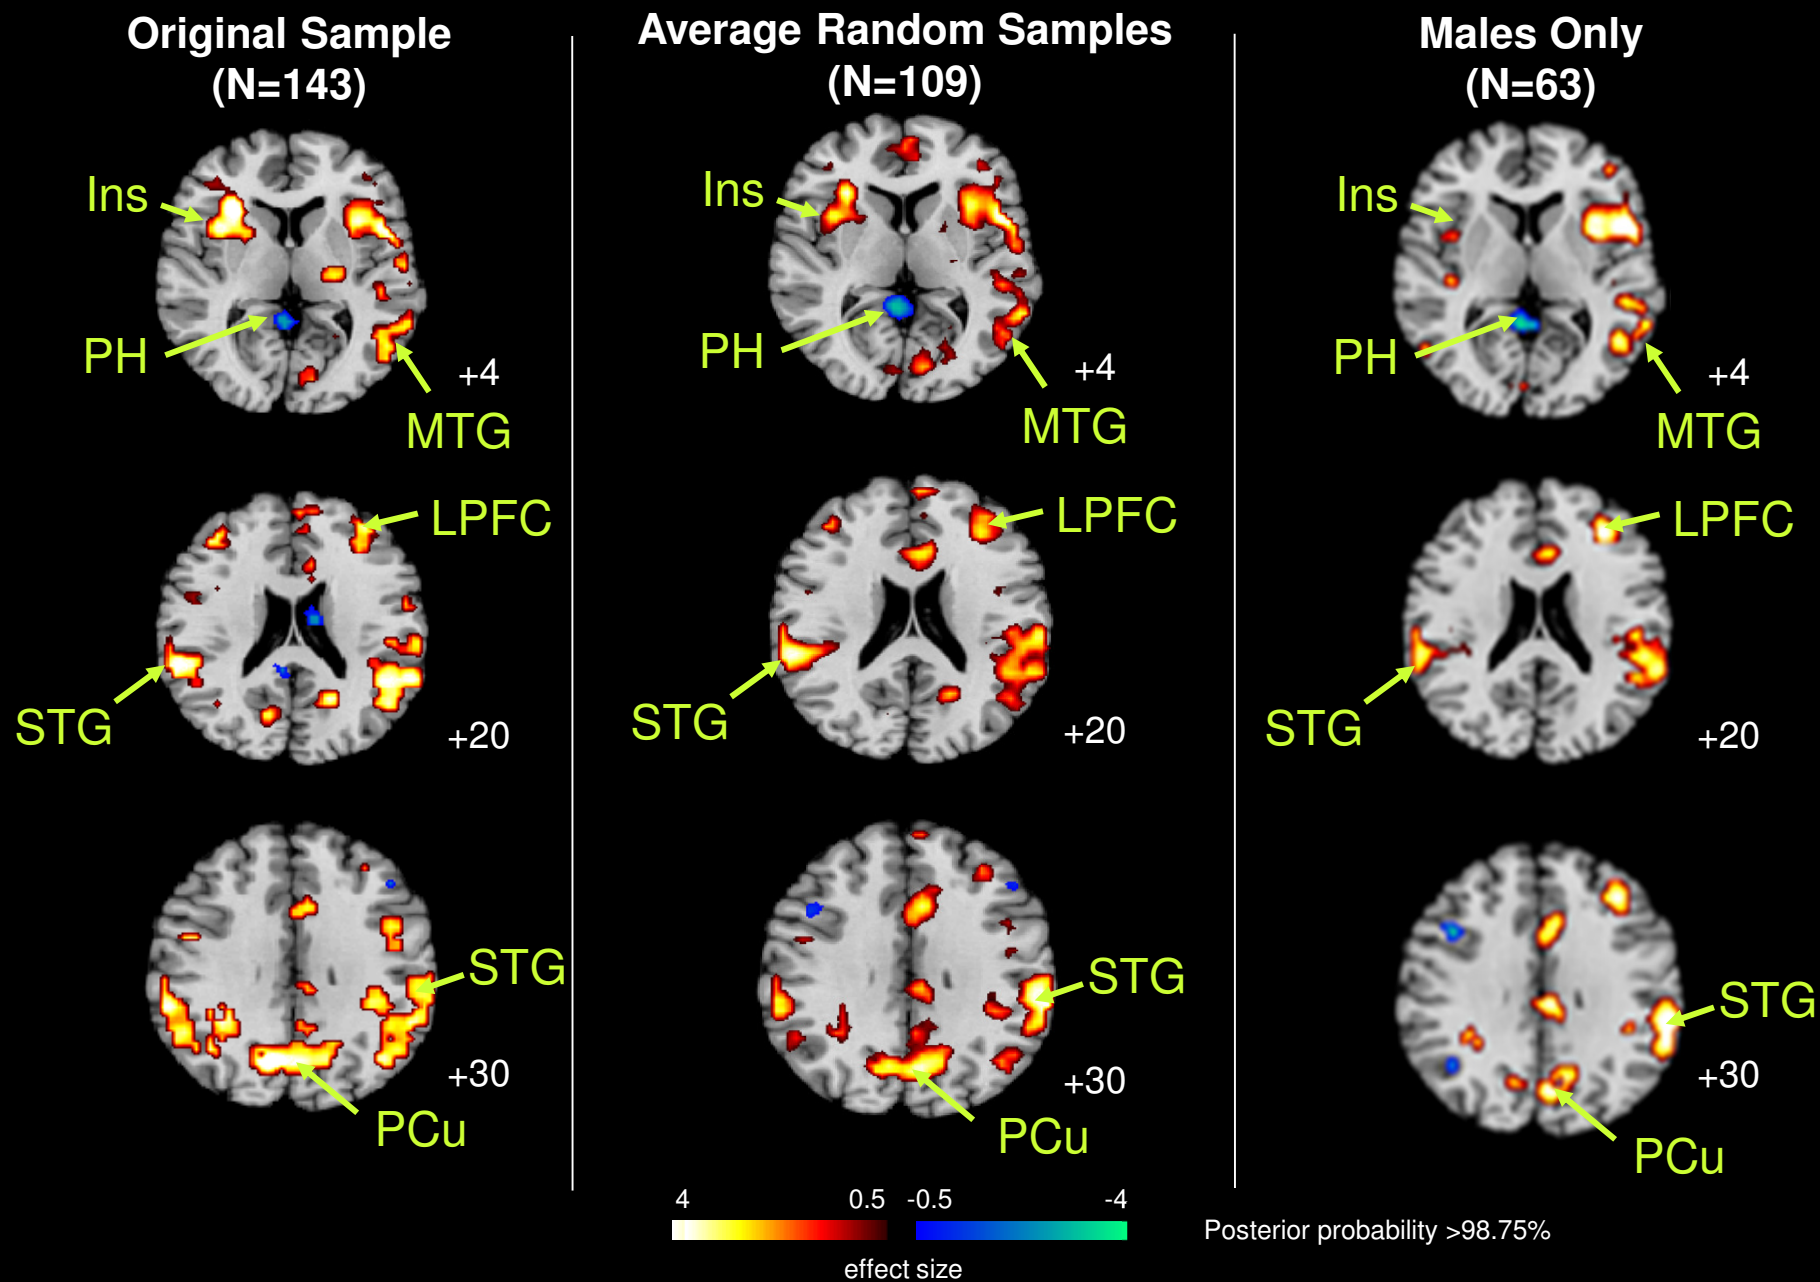

# Interference-Related Activity: Resilience Effects

SM eFigure 8  
Panel 2

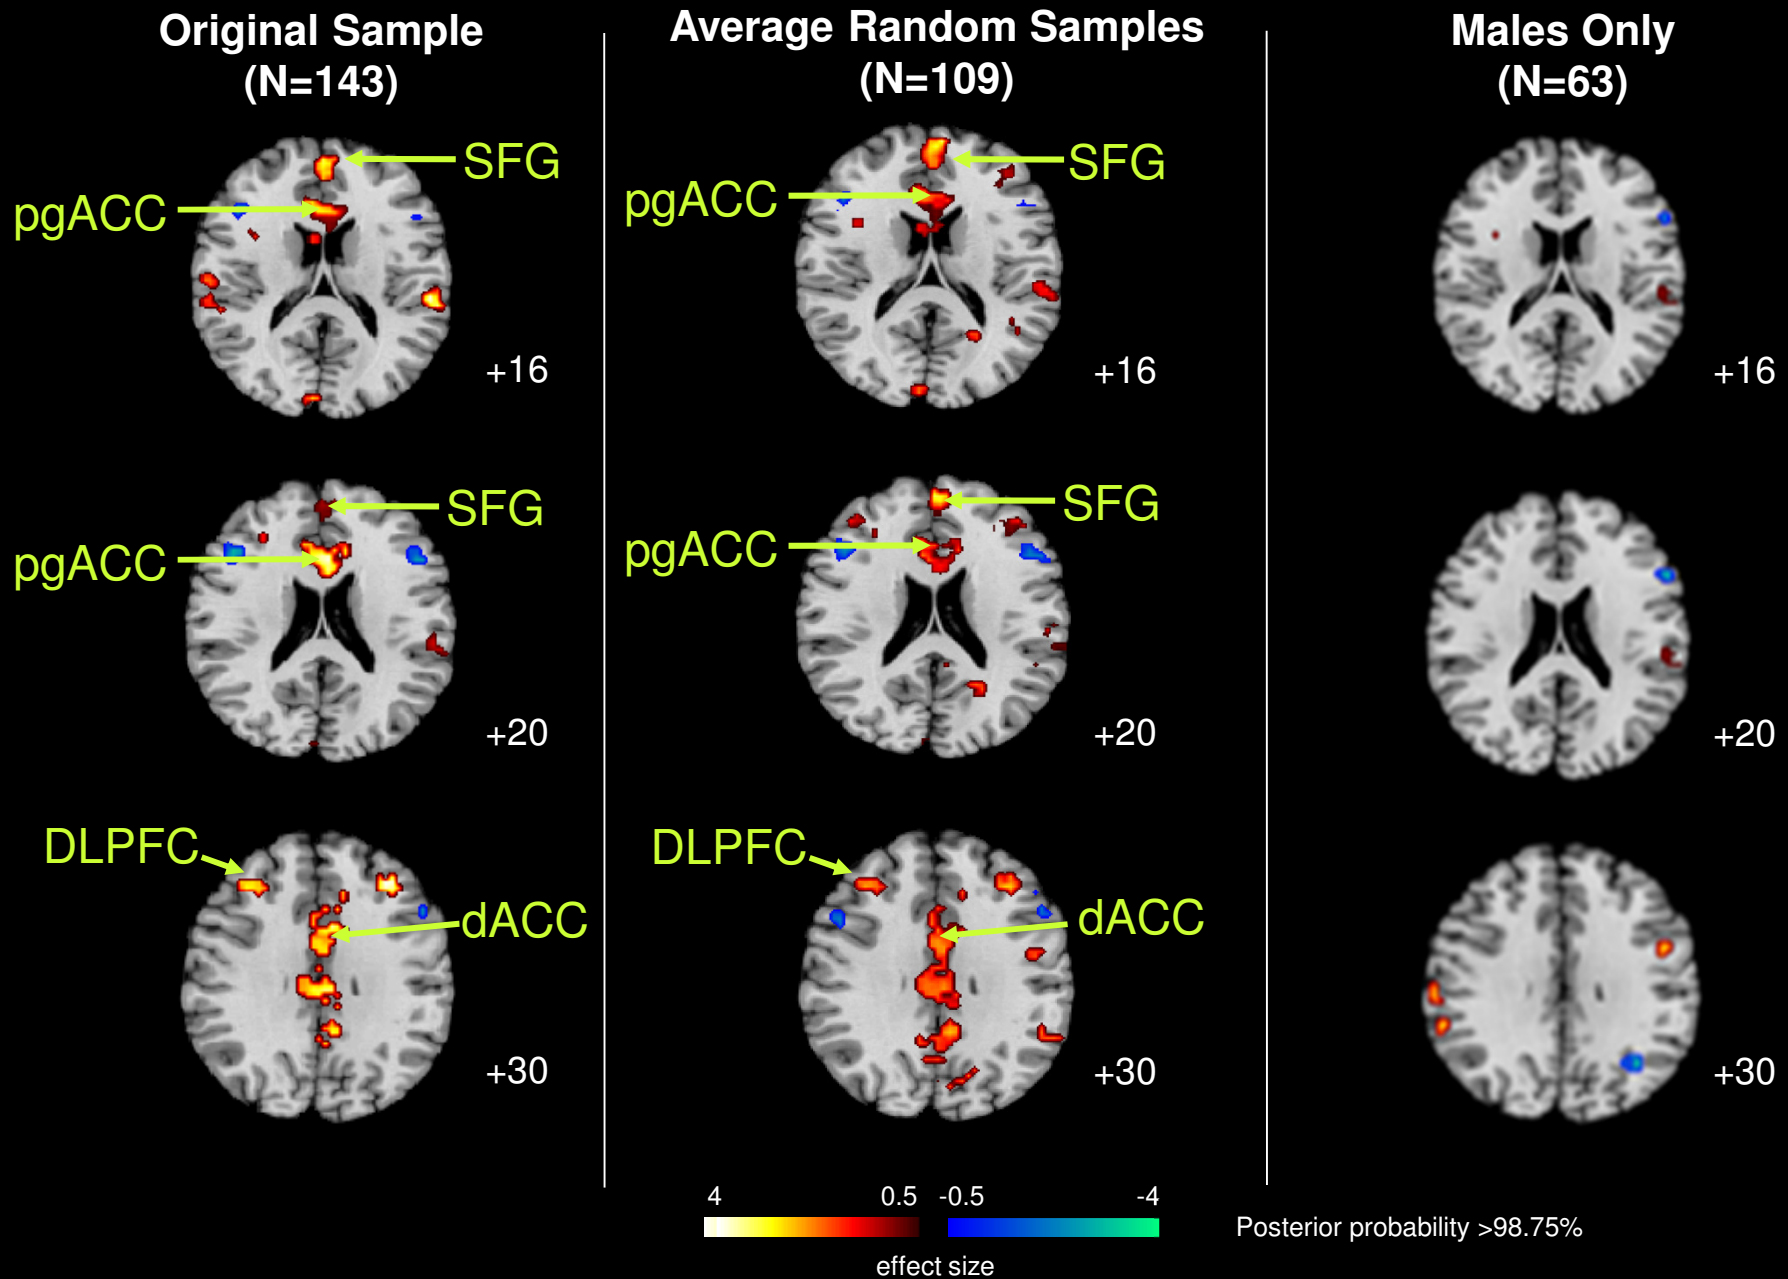

# Interference-Related Activity: Lifetime Illness Effects

SM eFigure 8  
Panel 3

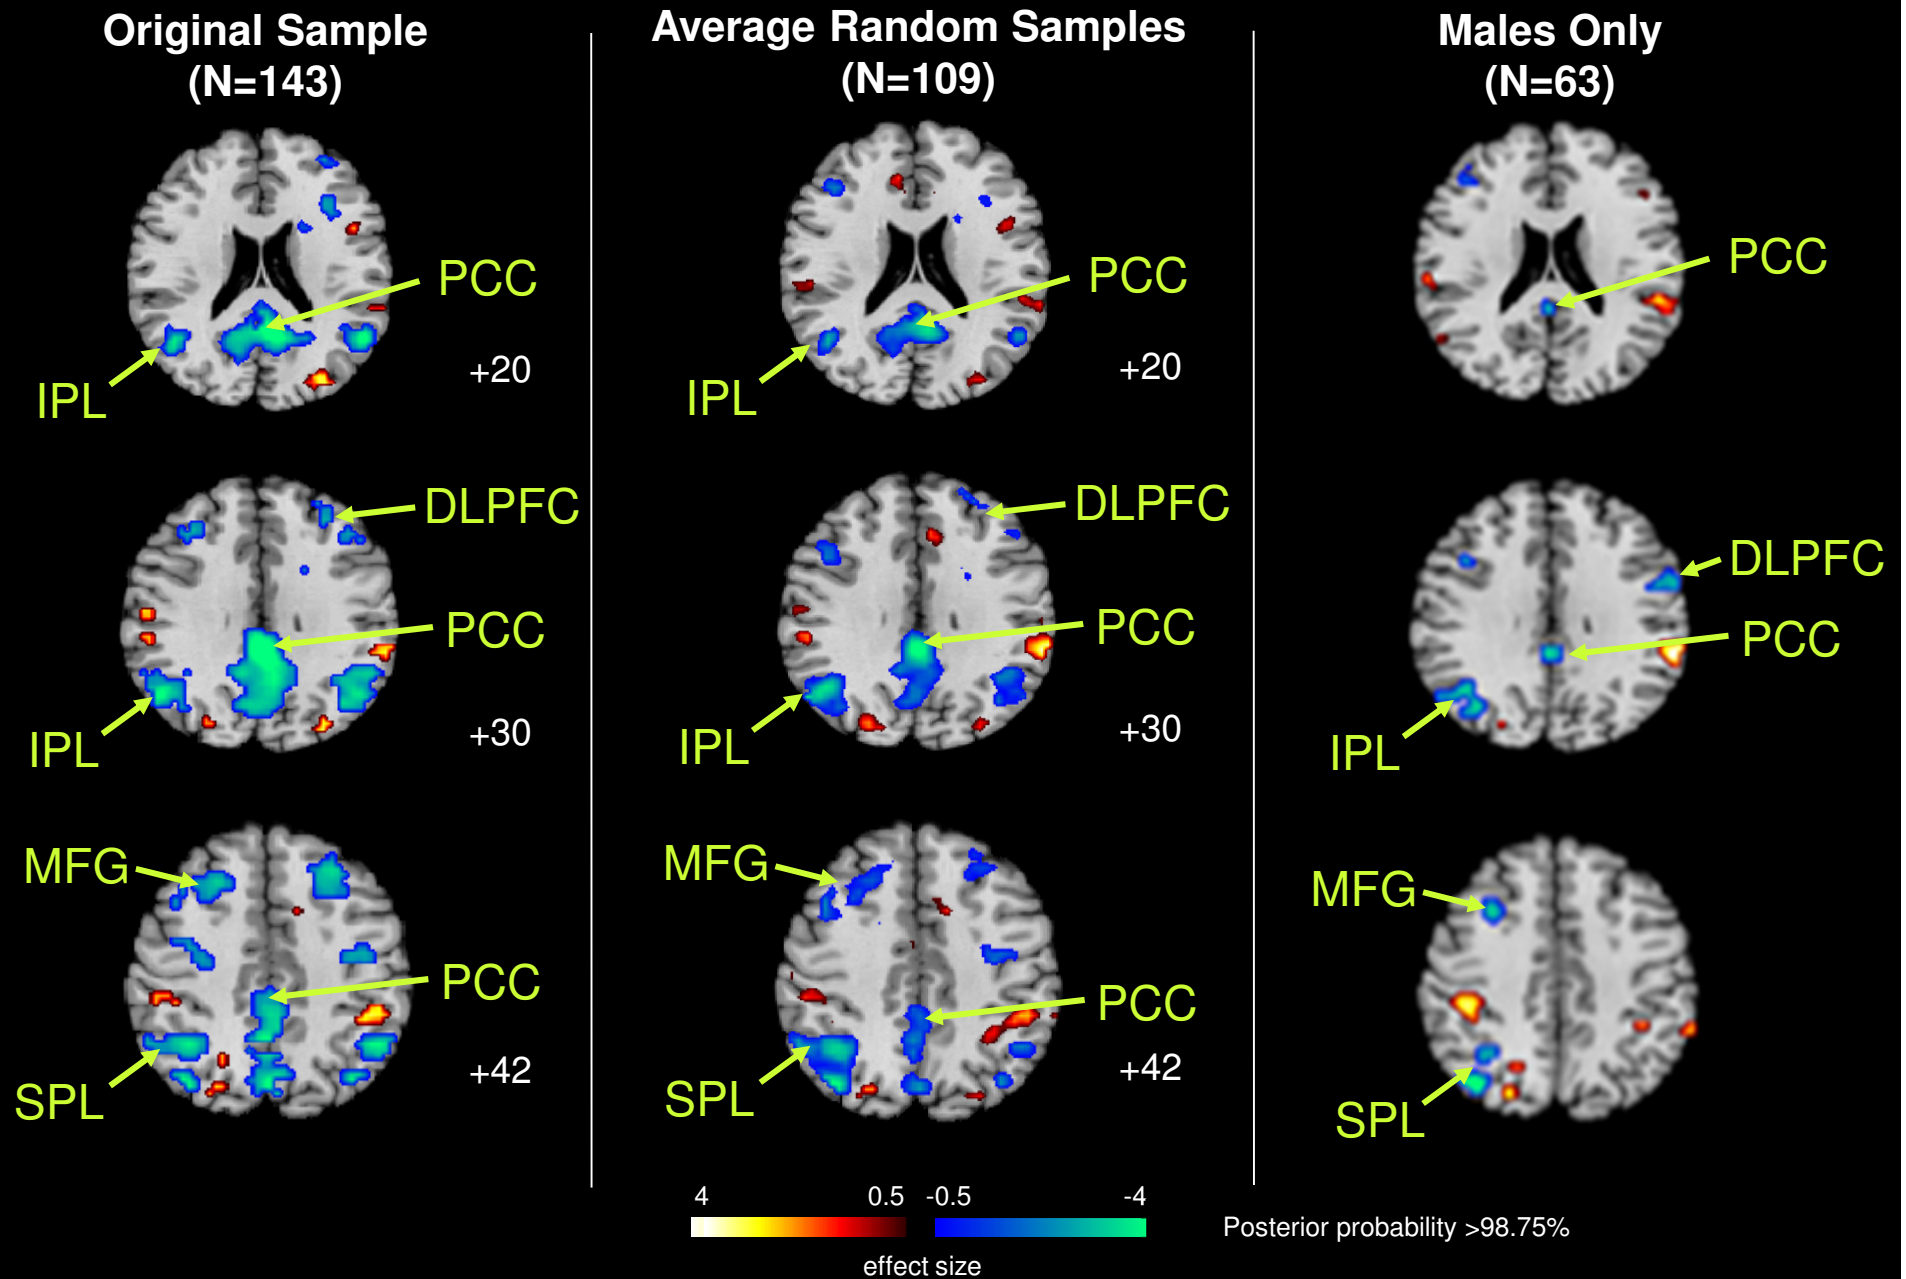



**e8**

**Findings when Including Only Participants 25 Years of Age or Older**

**(N=84; 58 HR, 26 LR)**

Risk, Resilience, and Illness Effects

Identified Using Regression Analyses

(covarying for age, sex, and interference effects)

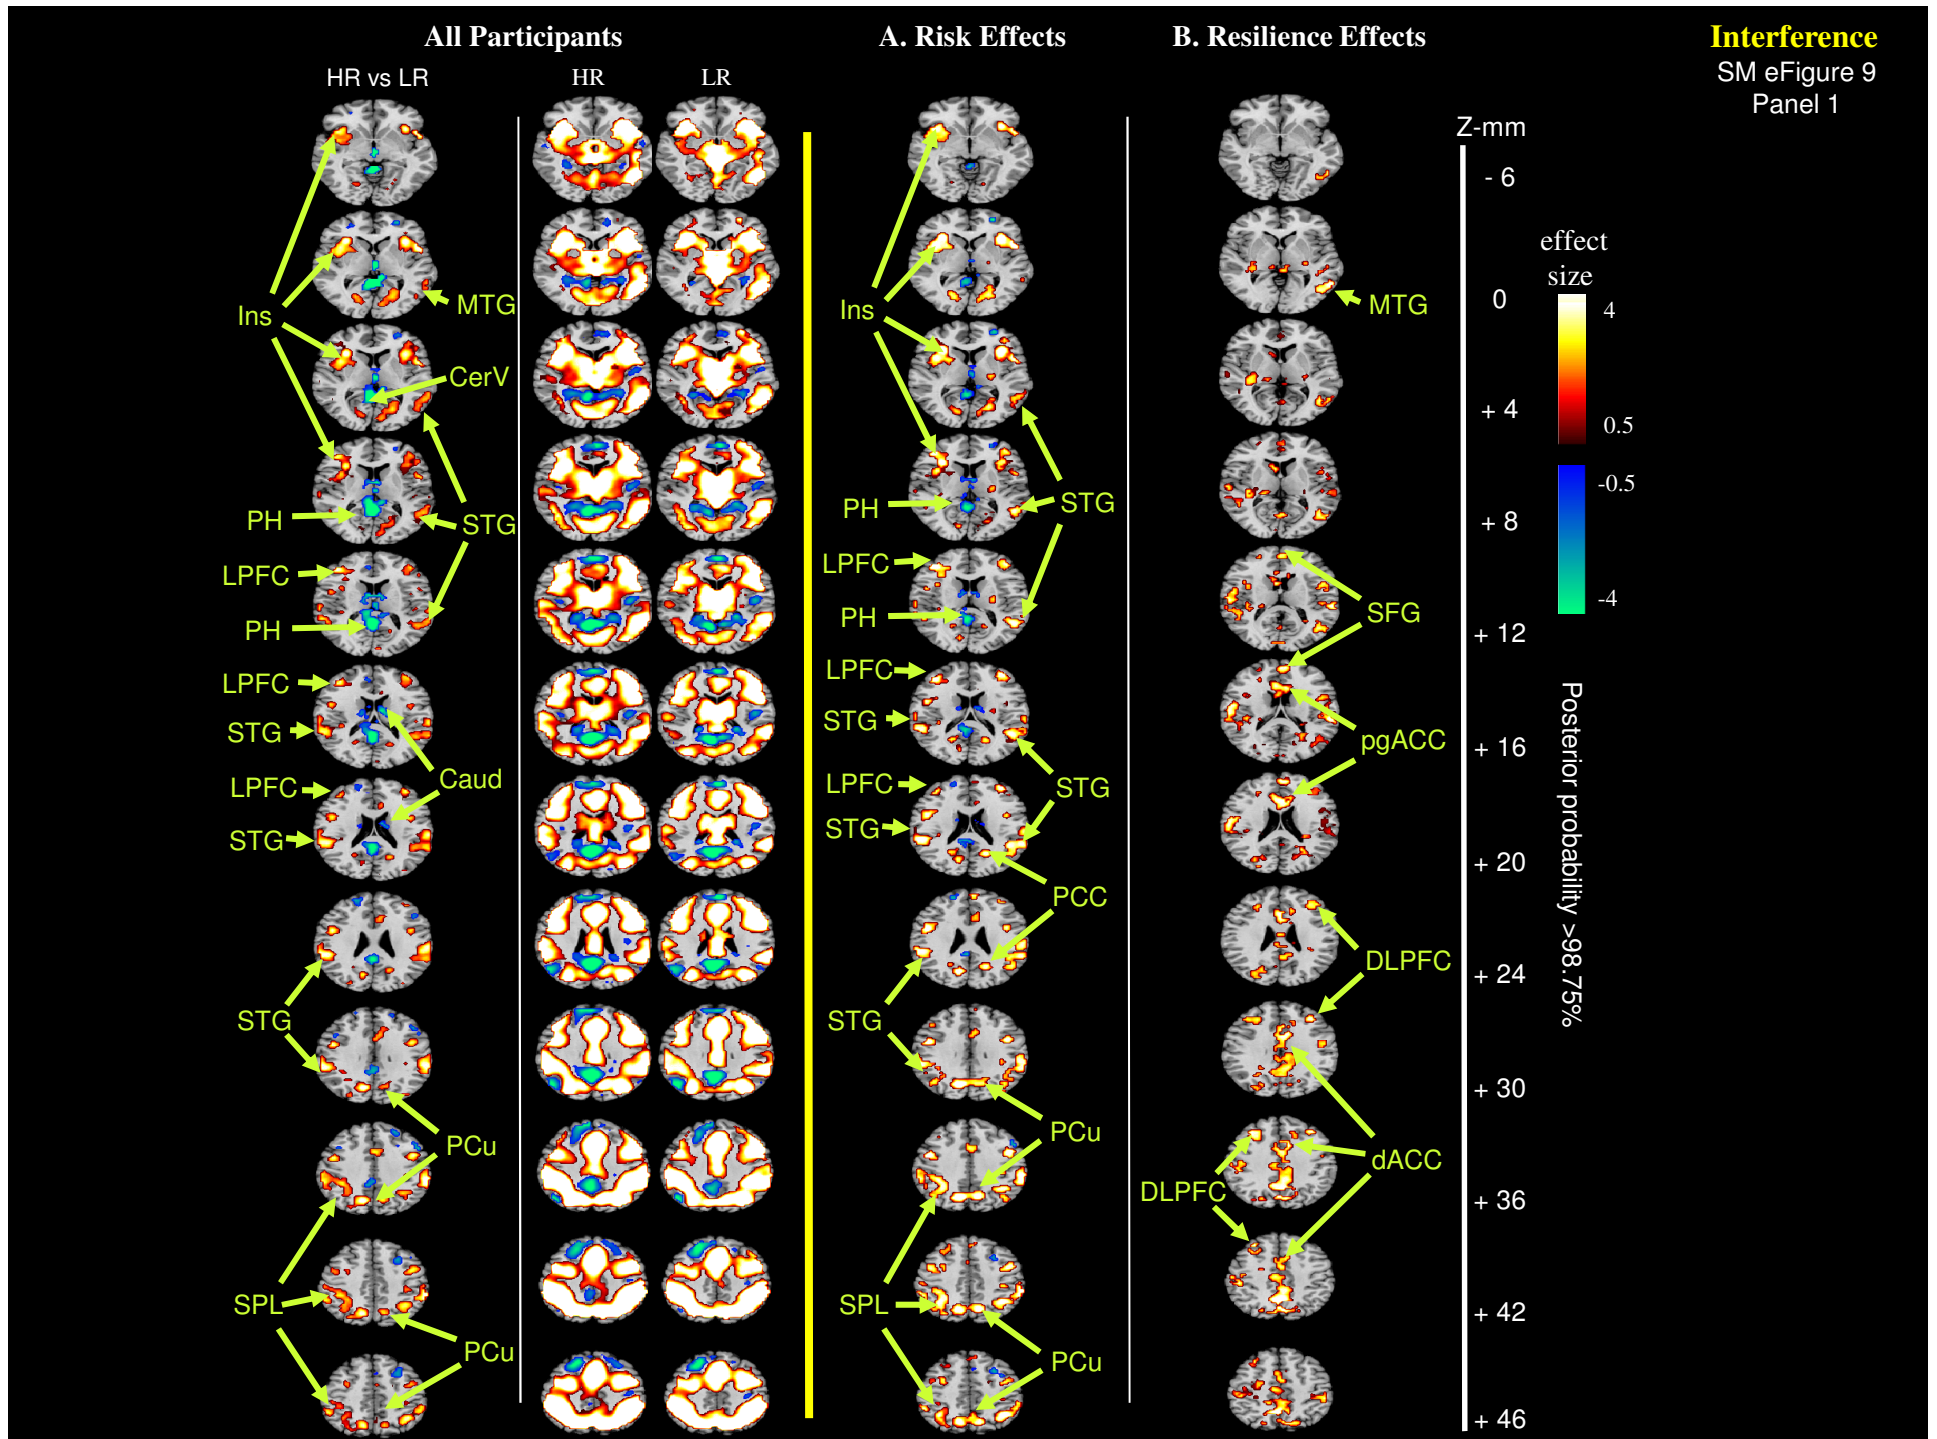

### C. Lifetime Illness Effects

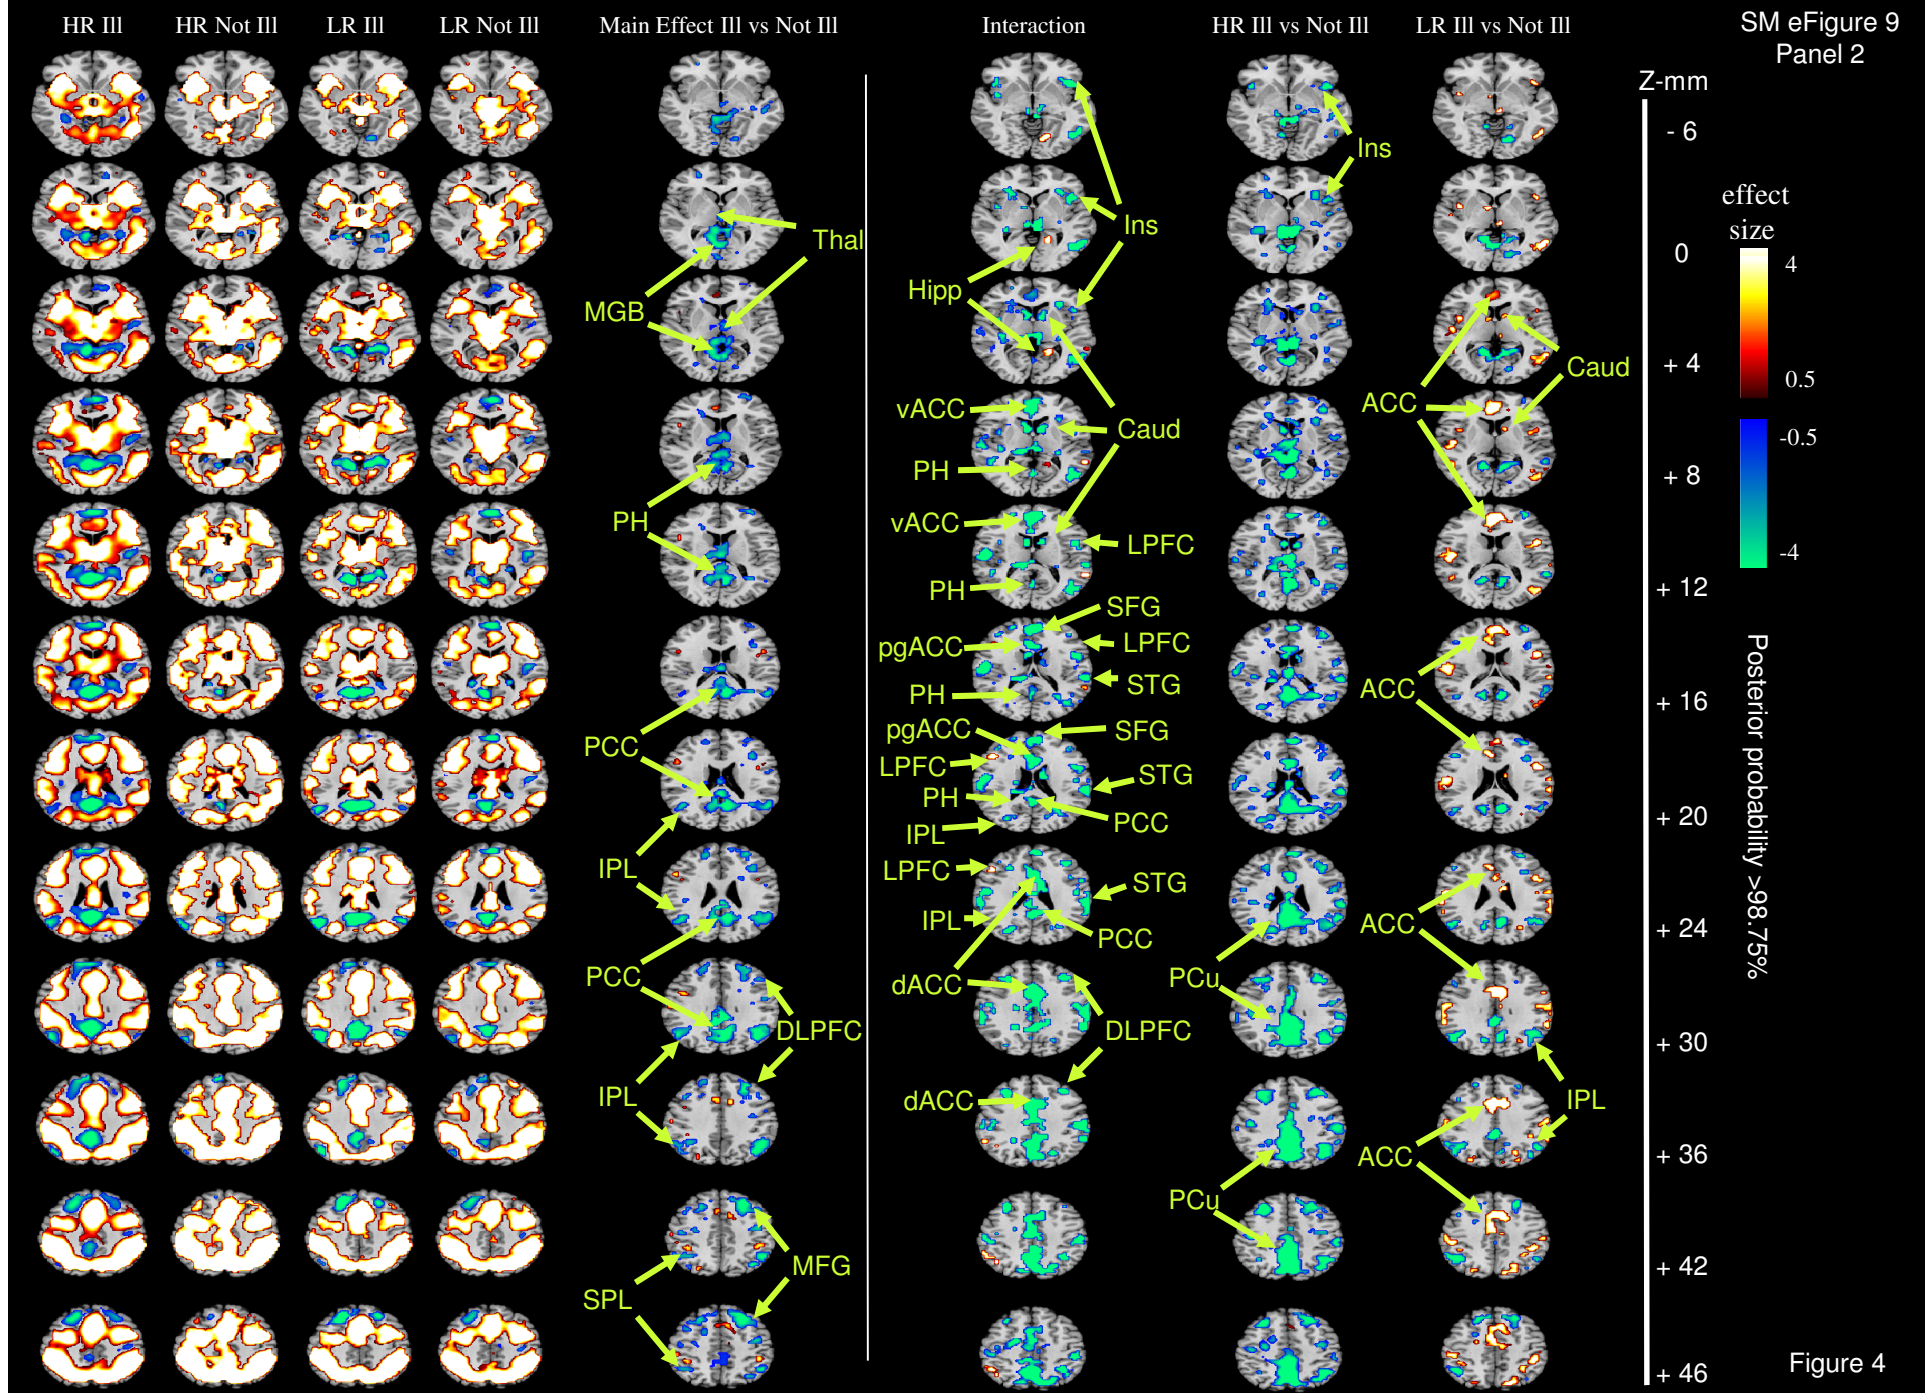

Figure 4

Resilience Effects

HR Not III LR Not III

HR-Specific Illness Effects

HR III vs Not III

HR III

HR Not III

Error-Related Activity

SM eFigure 10

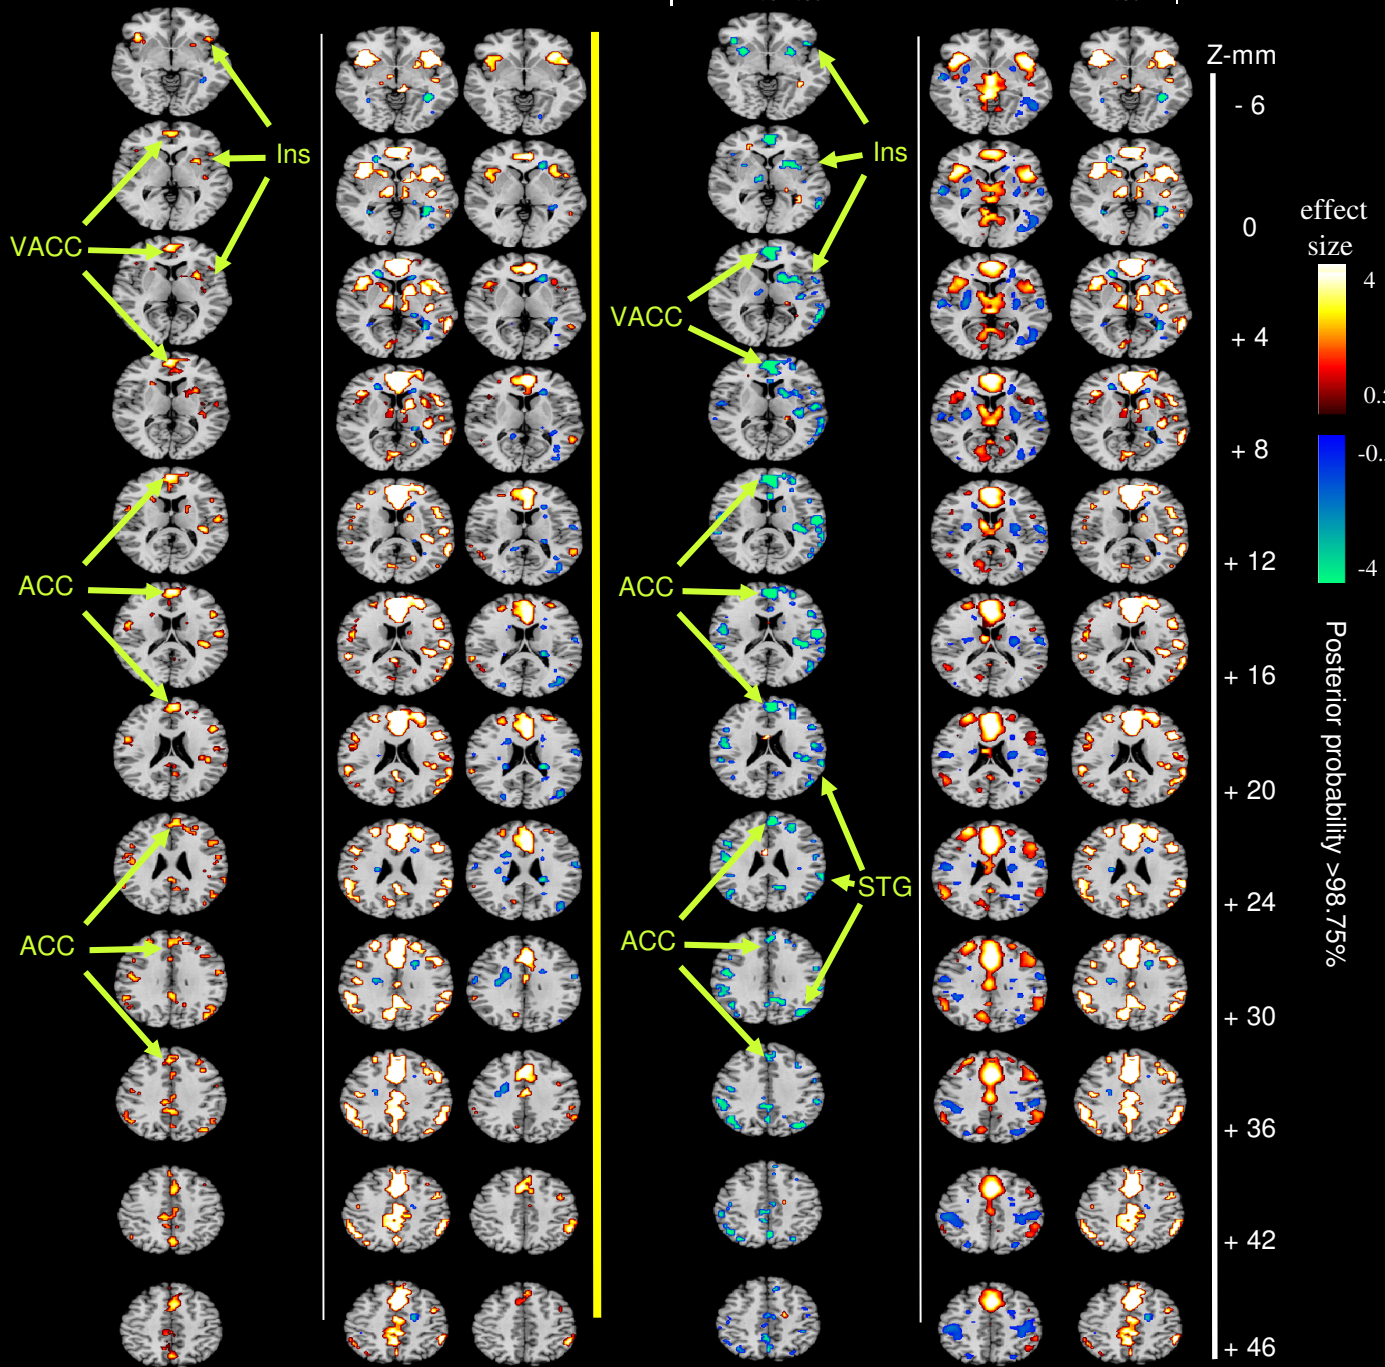



**e9**

**Interference-Related Activity without Covarying for  
Generation (G2 or G3) or the Genealogical Index of Familiarity (GIF)**

**(N=143, 83 HR, 60 LR)**

**Risk, Resilience, and Illness Effects  
Covarying for Age, Sex, and Interference Scores**

# Interference-Related Activity Covarying for Age, Sex, and Interference

SM eFigure 11

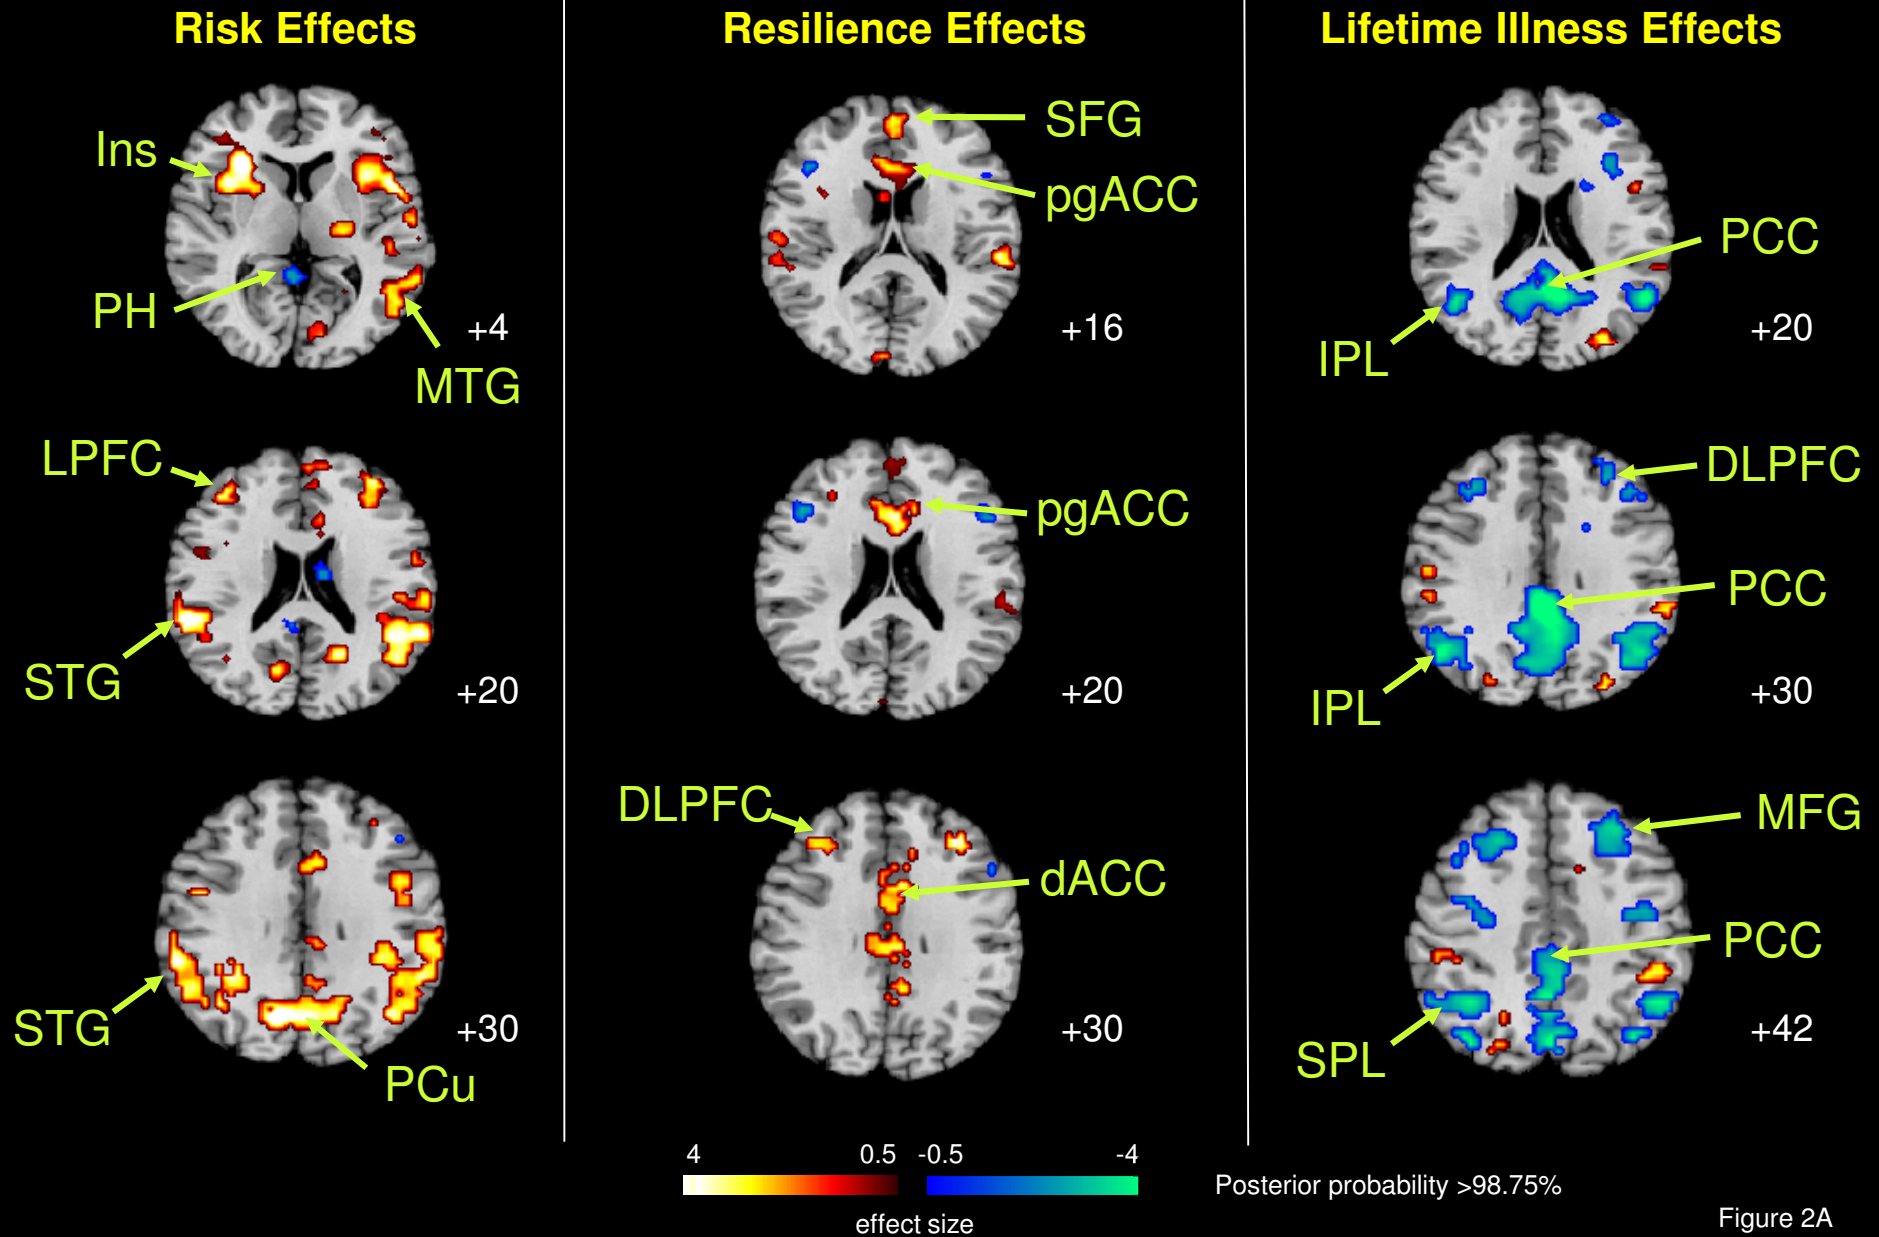

Figure 2A

**e10**

**Correlation of Activation in the Risk Effects Map  
with a Measure of Right Hemisphere Cortical Thickness**

N=134 (78 HR, 56 LR) participants who had both functional and anatomical measures

## Lateral Prefrontal Cortex

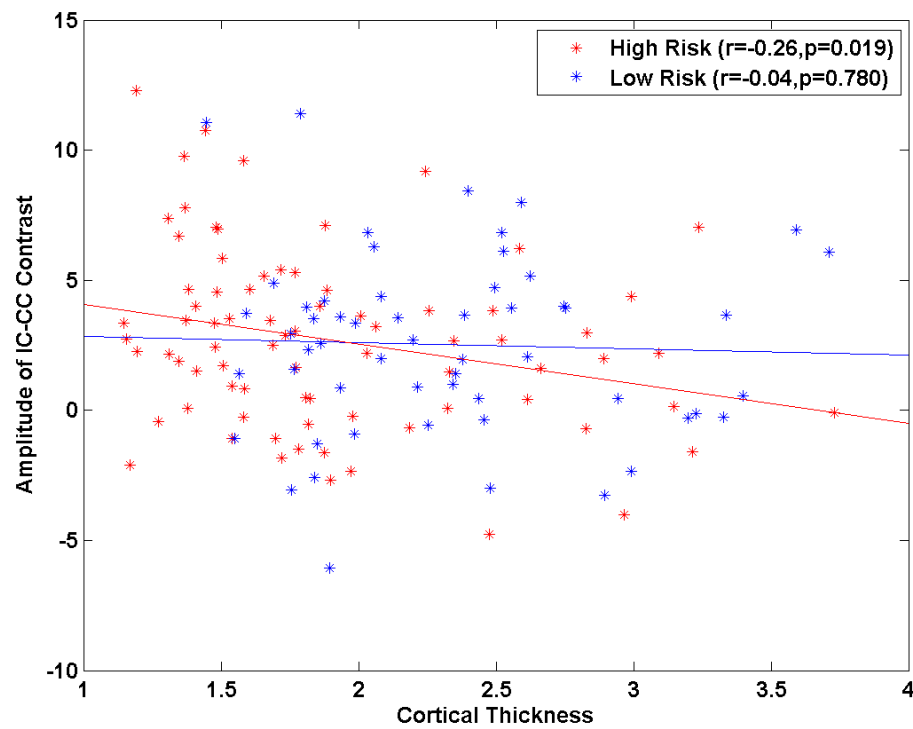

## Insula

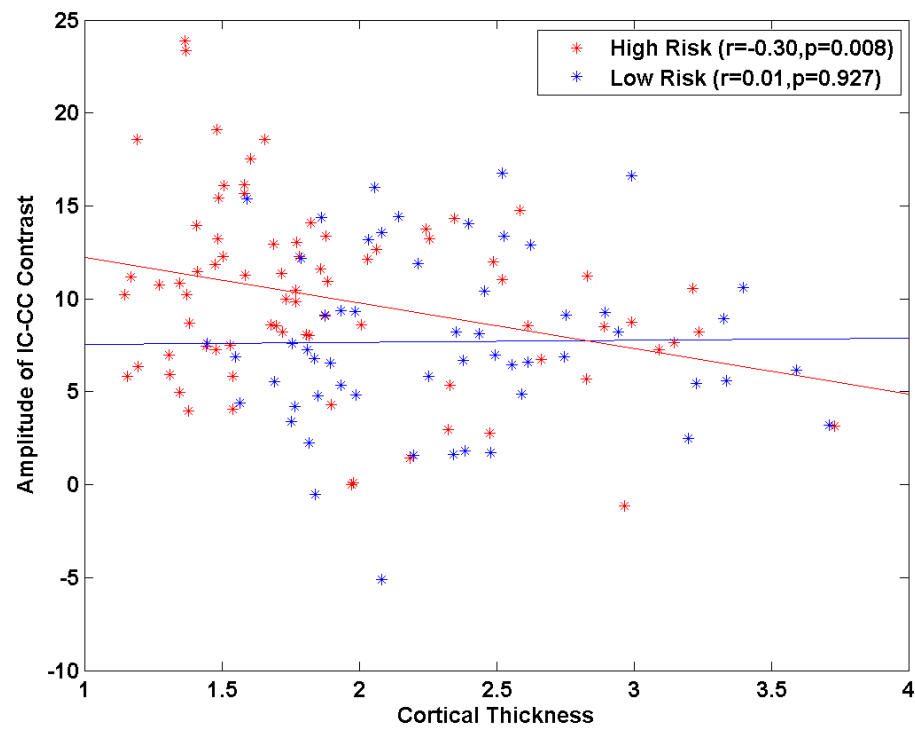

## Interference-Related Activity

Covarying for Right Hemisphere Cortical Thickness, Age, Sex, and Interference  
 N=134 (78 HR, 56 LR)

### Risk Effects

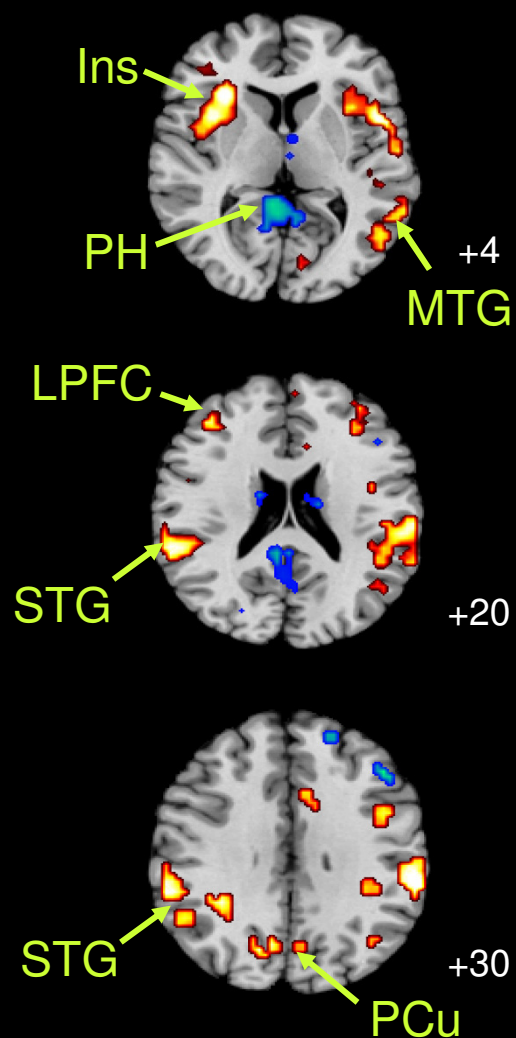

### Resilience Effects

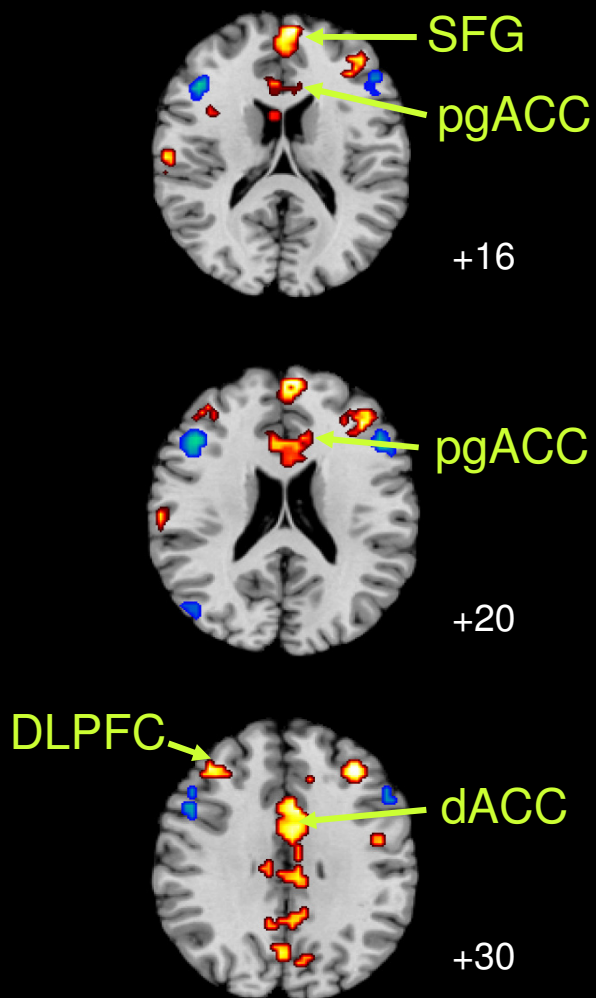

### Lifetime Illness Effects

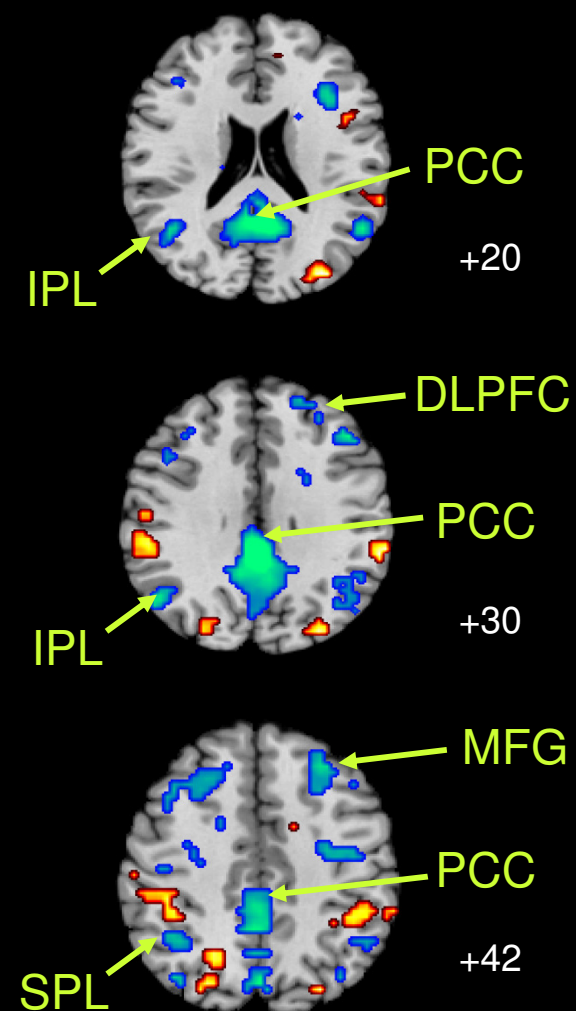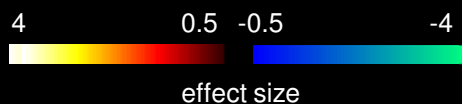

Posterior probability >98.75%



**e11**

## Logical Conjunction Analyses

Identification of Risk, Resilience, and Illness Effects

All participants (N=143, 83 HR, 60 LR)

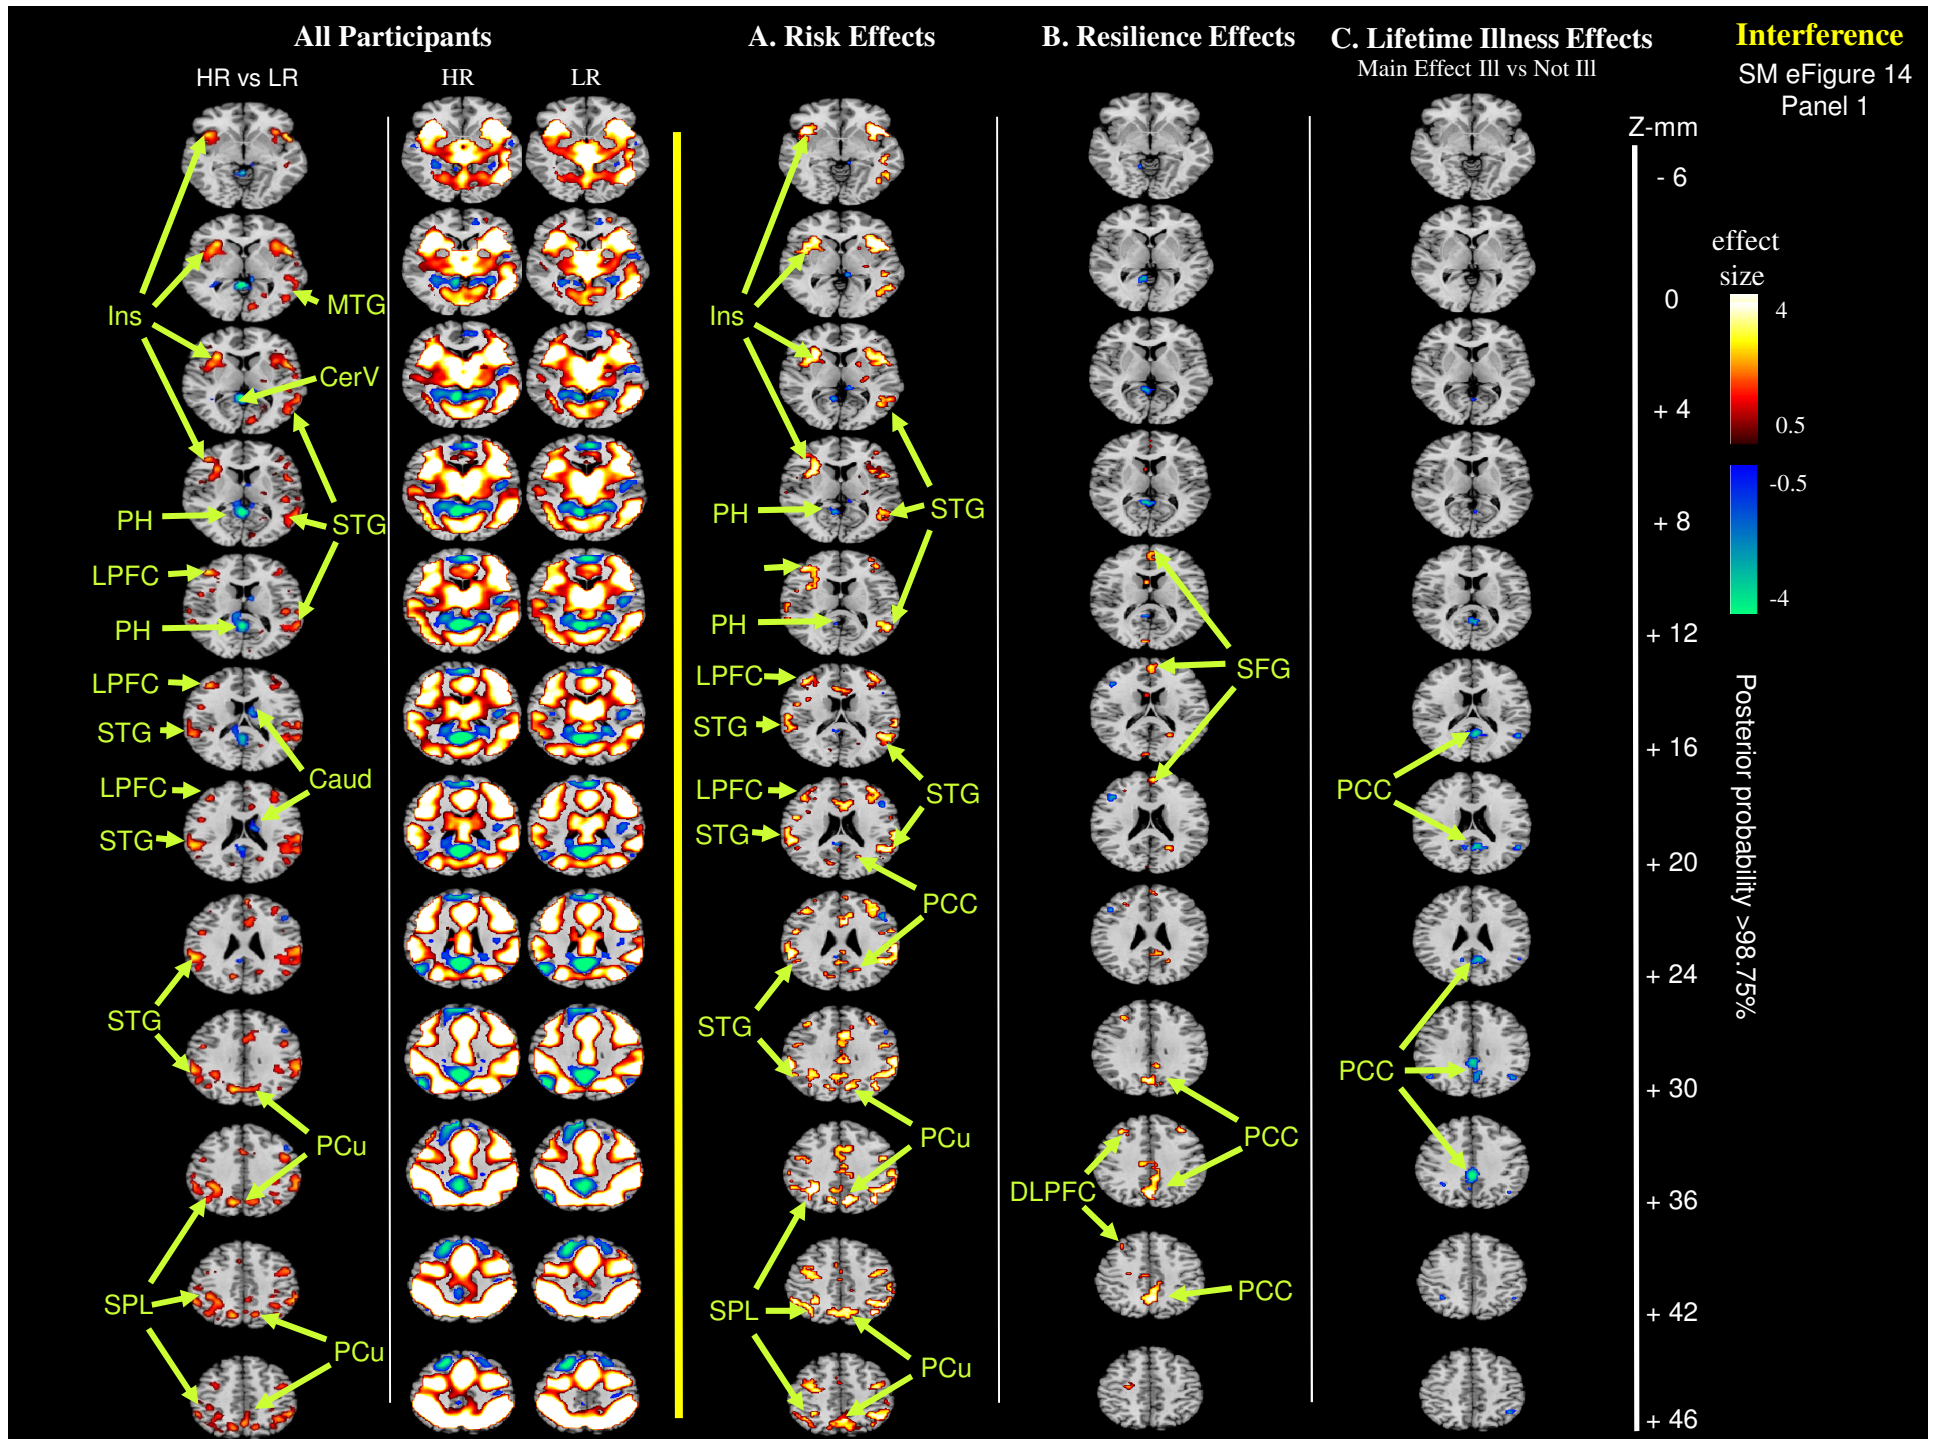

Resilience Effects

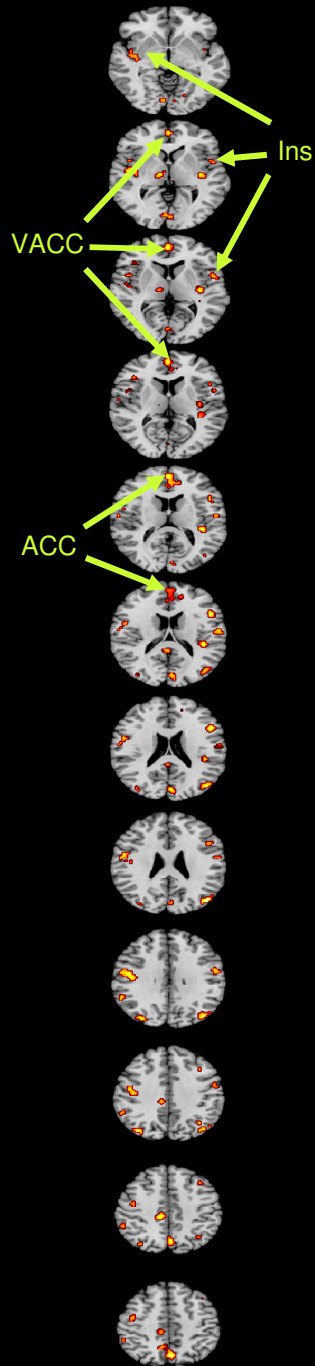

HR Not III LR Not III

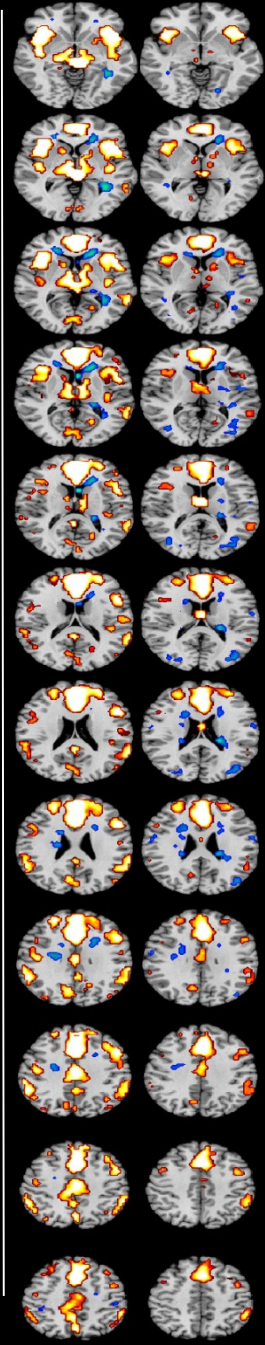

Z-mm

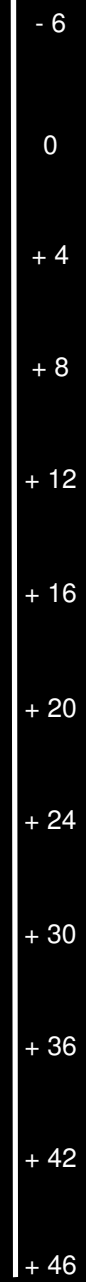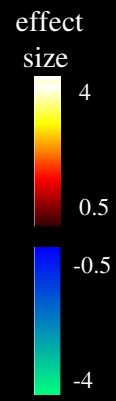

Posterior probability >98.75%

Error-Related Activity

SM eFigure 14  
Panel 2

## Logical Conjunction Analyses

(for Participants 25 Years or Older -- N=84; 58 HR, 26 LR)

Identification of Risk, Resilience, and Illness Effects

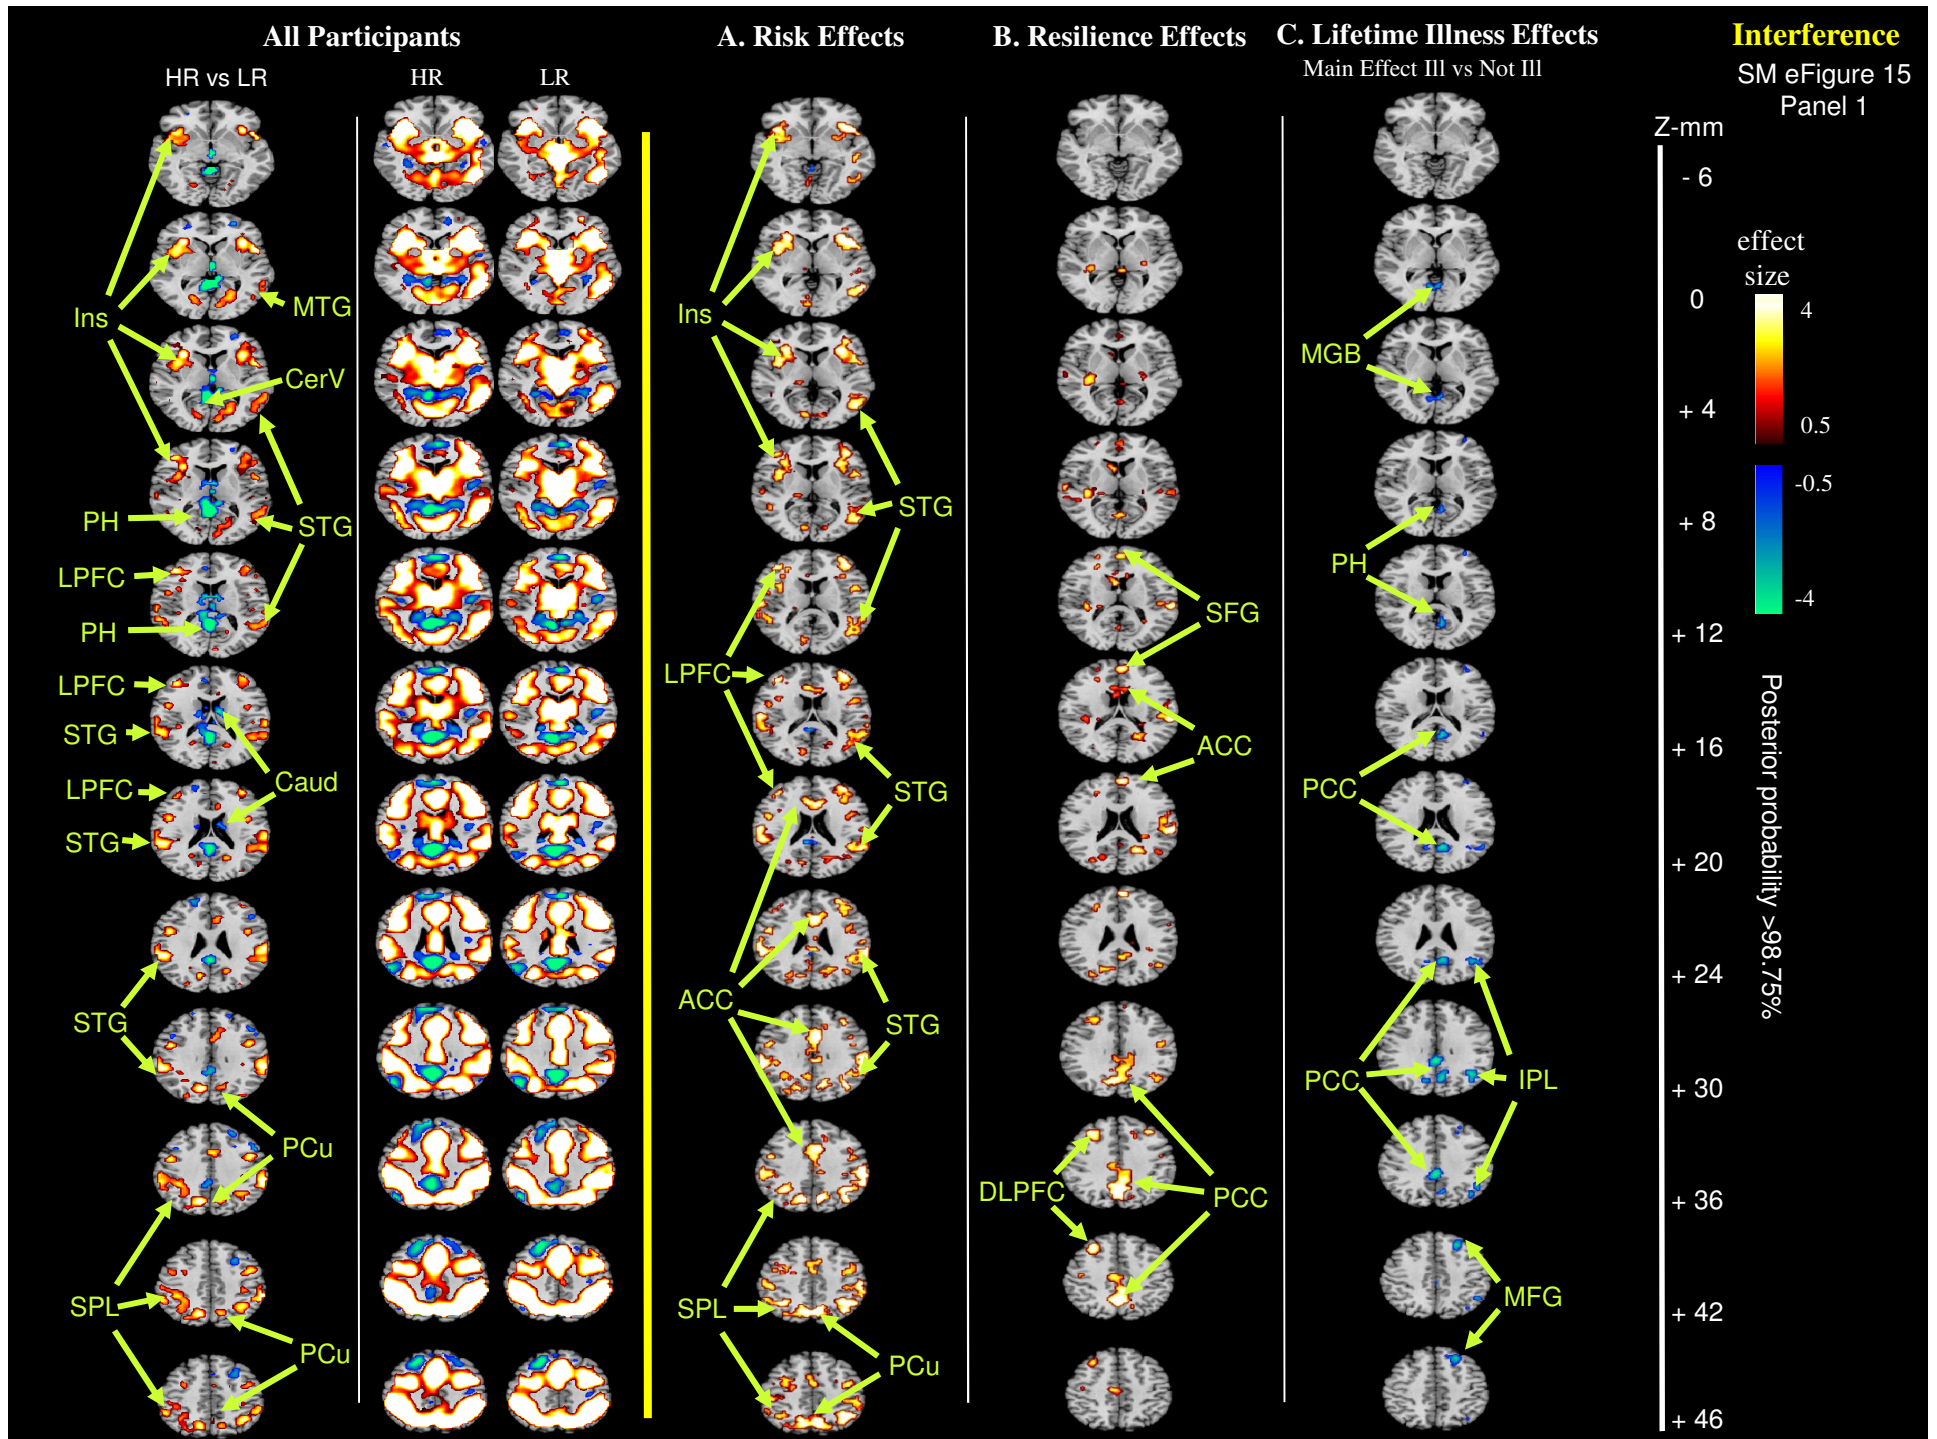



Resilience Effects

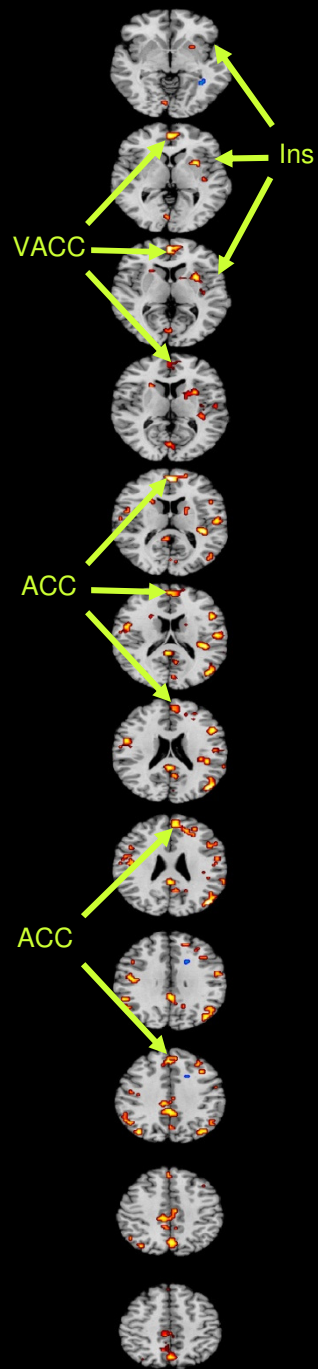

HR Not III LR Not III

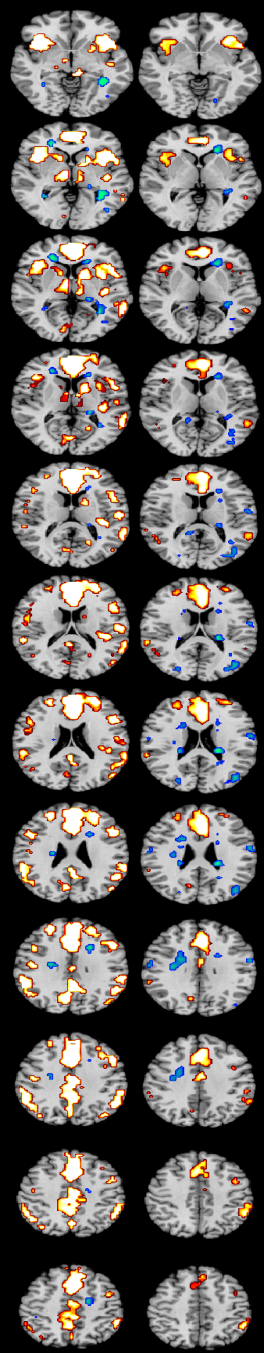

Error-Related Activity

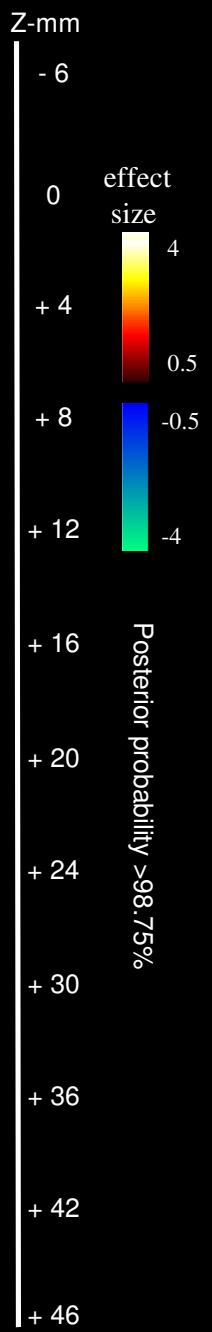

SM eFigure 15  
Panel 2
